# Supplementary material for: Heavy Chronic Intermittent Ethanol Exposure Alters Small Noncoding RNAs in Mouse Sperm and Epididymosomes
Source: Front Genet. 2018 Feb 8;9:32. doi: 10.3389/fgene.2018.00032 (PMC5809758; doi:10.3389/fgene.2018.00032)
Supplement: Supplementary Table 4 — Predicted 5′-UTR, coding, and 3′-UTR targets of ethanol-responsive sperm tDR. [file Table4.XLSX]

## Sheet: Glu-CTC
Column1	Column2	Column3	Column4
Ensembl Gene ID	Gene Symbol	Species	Gene Name
ENSMUSG00000038517	TBKBP1	Mus musculus	TBK1 binding protein 1(Tbkbp1)
ENSMUSG00000039361	PICALM	Mus musculus	phosphatidylinositol binding clathrin assembly protein(Picalm)
ENSMUSG00000026254	EIF4E2	Mus musculus	eukaryotic translation initiation factor 4E member 2(Eif4e2)
ENSMUSG00000024360	ETF1	Mus musculus	eukaryotic translation termination factor 1(Etf1)
ENSMUSG00000066894	vsig10	Mus musculus	V-set and immunoglobulin domain containing 10(Vsig10)
ENSMUSG00000026258	3110079O15Rik	Mus musculus	RIKEN cDNA 3110079O15 gene(3110079O15Rik)
ENSMUSG00000024366	GFRA3	Mus musculus	glial cell line derived neurotrophic factor family receptor alpha 3(Gfra3)
ENSMUSG00000032502	stac	Mus musculus	src homology three (SH3) and cysteine rich domain(Stac)
ENSMUSG00000050199	LGR4	Mus musculus	leucine-rich repeat-containing G protein-coupled receptor 4(Lgr4)
ENSMUSG00000032500	DCLK3	Mus musculus	doublecortin-like kinase 3(Dclk3)
ENSMUSG00000006058	SNF8	Mus musculus	SNF8, ESCRT-II complex subunit, homolog (S. cerevisiae)(Snf8)
ENSMUSG00000024369	NELFE	Mus musculus	negative elongation factor complex member E, Rdbp(Nelfe)
ENSMUSG00000071497	Nutf2-ps1	Mus musculus	nuclear transport factor 2, pseudogene 1(Nutf2-ps1)
ENSMUSG00000018509	cenpv	Mus musculus	centromere protein V(Cenpv)
ENSMUSG00000042444	FAM63B	Mus musculus	family with sequence similarity 63, member B(Fam63b)
ENSMUSG00000019975	IKBIP	Mus musculus	IKBKB interacting protein(Ikbip)
ENSMUSG00000025484	BET1L	Mus musculus	Bet1 golgi vesicular membrane trafficking protein like(Bet1l)
ENSMUSG00000047420	FAM180A	Mus musculus	family with sequence similarity 180, member A(Fam180a)
ENSMUSG00000042448	HOXD1	Mus musculus	homeobox D1(Hoxd1)
ENSMUSG00000025482	ODF3	Mus musculus	outer dense fiber of sperm tails 3(Odf3)
ENSMUSG00000042032	MAT2B	Mus musculus	methionine adenosyltransferase II, beta(Mat2b)
ENSMUSG00000072946	PTGR2	Mus musculus	prostaglandin reductase 2(Ptgr2)
ENSMUSG00000006463	ZDHHC24	Mus musculus	zinc finger, DHHC domain containing 24(Zdhhc24)
ENSMUSG00000086322	E130218I03Rik	Mus musculus	RIKEN cDNA E130218I03 gene(E130218I03Rik)
ENSMUSG00000053399	ADAMTS18	Mus musculus	a disintegrin-like and metallopeptidase (reprolysin type) with thrombospondin type 1 motif, 18(Adamts18)
ENSMUSG00000024352	SPATA24	Mus musculus	spermatogenesis associated 24(Spata24)
ENSMUSG00000024357	SIL1	Mus musculus	endoplasmic reticulum chaperone SIL1 homolog (S. cerevisiae)(Sil1)
ENSMUSG00000047434	XXYLT1	Mus musculus	xyloside xylosyltransferase 1(Xxylt1)
ENSMUSG00000012848	RPS5	Mus musculus	ribosomal protein S5(Rps5)
ENSMUSG00000042439	Zfp532	Mus musculus	zinc finger protein 532(Zfp532)
ENSMUSG00000025495	ptdss2	Mus musculus	phosphatidylserine synthase 2(Ptdss2)
ENSMUSG00000061111	fam195b	Mus musculus	family with sequence similarity 195, member B(Fam195b)
ENSMUSG00000042046	DSTYK	Mus musculus	dual serine/threonine and tyrosine protein kinase(Dstyk)
ENSMUSG00000026271	GPR35	Mus musculus	G protein-coupled receptor 35(Gpr35)
ENSMUSG00000009073	NF2	Mus musculus	neurofibromatosis 2(Nf2)
ENSMUSG00000026270	CAPN10	Mus musculus	calpain 10(Capn10)
ENSMUSG00000054115	SKP2	Mus musculus	S-phase kinase-associated protein 2 (p45)(Skp2)
ENSMUSG00000019590	CYB561	Mus musculus	cytochrome b-561(Cyb561)
ENSMUSG00000042428	MGAT3	Mus musculus	mannoside acetylglucosaminyltransferase 3(Mgat3)
ENSMUSG00000041303	GTF3C3	Mus musculus	general transcription factor IIIC, polypeptide 3(Gtf3c3)
ENSMUSG00000047443	FAM132B	Mus musculus	family with sequence similarity 132, member B(Fam132b)
ENSMUSG00000027332	IVD	Mus musculus	isovaleryl coenzyme A dehydrogenase(Ivd)
ENSMUSG00000042425	FRMPD3	Mus musculus	FERM and PDZ domain containing 3(Frmpd3)
ENSMUSG00000000532	ACVR1B	Mus musculus	activin A receptor, type 1B(Acvr1b)
ENSMUSG00000020814	MXRA7	Mus musculus	matrix-remodelling associated 7(Mxra7)
ENSMUSG00000046792	Zfp787	Mus musculus	zinc finger protein 787(Zfp787)
ENSMUSG00000045594	GLB1	Mus musculus	galactosidase, beta 1(Glb1)
ENSMUSG00000078812	EIF5A	Mus musculus	eukaryotic translation initiation factor 5A(Eif5a)
ENSMUSG00000078816	prkcg	Mus musculus	protein kinase C, gamma(Prkcg)
ENSMUSG00000079481	NHSL2	Mus musculus	NHS-like 2(Nhsl2)
ENSMUSG00000032515	CSRNP1	Mus musculus	cysteine-serine-rich nuclear protein 1(Csrnp1)
ENSMUSG00000026288	INPP5D	Mus musculus	inositol polyphosphate-5-phosphatase D(Inpp5d)
ENSMUSG00000003283	HCK	Mus musculus	hemopoietic cell kinase(Hck)
ENSMUSG00000011305	PLIN5	Mus musculus	perilipin 5(Plin5)
ENSMUSG00000038936	SCCPDH	Mus musculus	saccharopine dehydrogenase (putative)(Sccpdh)
ENSMUSG00000020821	KIF1C	Mus musculus	kinesin family member 1C(Kif1c)
ENSMUSG00000020823	SEC14L1	Mus musculus	SEC14-like lipid binding 1(Sec14l1)
ENSMUSG00000040272	ACCS	Mus musculus	1-aminocyclopropane-1-carboxylate synthase (non-functional)(Accs)
ENSMUSG00000022023	WBP4	Mus musculus	WW domain binding protein 4(Wbp4)
ENSMUSG00000079477	Rab7	Mus musculus	RAB7, member RAS oncogene family(Rab7)
ENSMUSG00000019173	RAB5C	Mus musculus	RAB5C, member RAS oncogene family(Rab5c)
ENSMUSG00000030782	TGFB1I1	Mus musculus	transforming growth factor beta 1 induced transcript 1(Tgfb1i1)
ENSMUSG00000055239	KCMF1	Mus musculus	potassium channel modulatory factor 1(Kcmf1)
ENSMUSG00000033237	ARID2	Mus musculus	AT rich interactive domain 2 (ARID, RFX-like)(Arid2)
ENSMUSG00000048997	ATXN7L2	Mus musculus	ataxin 7-like 2(Atxn7l2)
ENSMUSG00000056234	NCOA4	Mus musculus	nuclear receptor coactivator 4(Ncoa4)
ENSMUSG00000041328	PCF11	Mus musculus	PCF11 cleavage and polyadenylation factor subunit(Pcf11)
ENSMUSG00000071454	DTNB	Mus musculus	dystrobrevin, beta(Dtnb)
ENSMUSG00000038552	FNDC4	Mus musculus	fibronectin type III domain containing 4(Fndc4)
ENSMUSG00000006021	KPTN	Mus musculus	kaptin(Kptn)
ENSMUSG00000024399	LTB	Mus musculus	lymphotoxin B(Ltb)
ENSMUSG00000035151	ELMOD2	Mus musculus	ELMO/CED-12 domain containing 2(Elmod2)
ENSMUSG00000015217	HMGB3	Mus musculus	high mobility group box 3(Hmgb3)
ENSMUSG00000015214	MTMR1	Mus musculus	myotubularin related protein 1(Mtmr1)
ENSMUSG00000022010	TSC22D1	Mus musculus	TSC22 domain family, member 1(Tsc22d1)
ENSMUSG00000079469	PIGB	Mus musculus	phosphatidylinositol glycan anchor biosynthesis, class B(Pigb)
ENSMUSG00000033220	RAC2	Mus musculus	RAS-related C3 botulinum substrate 2(Rac2)
ENSMUSG00000024395	LIMS2	Mus musculus	LIM and senescent cell antigen like domains 2(Lims2)
ENSMUSG00000024393	PRRC2A	Mus musculus	proline-rich coiled-coil 2A(Prrc2a)
ENSMUSG00000022016	AKAP11	Mus musculus	A kinase (PRKA) anchor protein 11(Akap11)
ENSMUSG00000020390	UBE2B	Mus musculus	ubiquitin-conjugating enzyme E2B(Ube2b)
ENSMUSG00000028029	AIMP1	Mus musculus	aminoacyl tRNA synthetase complex-interacting multifunctional protein 1(Aimp1)
ENSMUSG00000038347	Tcte2	Mus musculus	t-complex-associated testis expressed 2(Tcte2)
ENSMUSG00000028023	PITX2	Mus musculus	paired-like homeodomain transcription factor 2(Pitx2)
ENSMUSG00000020396	NEFH	Mus musculus	neurofilament, heavy polypeptide(Nefh)
ENSMUSG00000020397	MED7	Mus musculus	mediator complex subunit 7(Med7)
ENSMUSG00000028412	SLC44A1	Mus musculus	solute carrier family 44, member 1(Slc44a1)
ENSMUSG00000025876	UNC5A	Mus musculus	unc-5 netrin receptor A(Unc5a)
ENSMUSG00000039345	METTL22	Mus musculus	methyltransferase like 22(Mettl22)
ENSMUSG00000008301	PHAX	Mus musculus	phosphorylated adaptor for RNA export(Phax)
ENSMUSG00000019194	SCN1B	Mus musculus	sodium channel, voltage-gated, type I, beta(Scn1b)
ENSMUSG00000035126	WDR78	Mus musculus	WD repeat domain 78(Wdr78)
ENSMUSG00000028410	DNAJA1	Mus musculus	DnaJ heat shock protein family (Hsp40) member A1(Dnaja1)
ENSMUSG00000025469	Msx3	Mus musculus	msh homeobox 3(Msx3)
ENSMUSG00000019189	RNF145	Mus musculus	ring finger protein 145(Rnf145)
ENSMUSG00000067924	Cxx1b	Mus musculus	CAAX box 1B(Cxx1b)
ENSMUSG00000028821	SYF2	Mus musculus	SYF2 homolog, RNA splicing factor (S. cerevisiae)(Syf2)
ENSMUSG00000067925	Cxx1a	Mus musculus	CAAX box 1A(Cxx1a)
ENSMUSG00000025468	CALY	Mus musculus	calcyon neuron-specific vesicular protein(Caly)
ENSMUSG00000038576	SUSD4	Mus musculus	sushi domain containing 4(Susd4)
ENSMUSG00000097394	TMEM134	Mus musculus	transmembrane protein 134(Tmem134)
ENSMUSG00000071477	Zfp777	Mus musculus	zinc finger protein 777(Zfp777)
ENSMUSG00000033697	ARHGAP39	Mus musculus	Rho GTPase activating protein 39(Arhgap39)
ENSMUSG00000053768	CHCHD3	Mus musculus	coiled-coil-helix-coiled-coil-helix domain containing 3(Chchd3)
ENSMUSG00000021901	BAP1	Mus musculus	Brca1 associated protein 1(Bap1)
ENSMUSG00000041351	RAP1GAP	Mus musculus	Rap1 GTPase-activating protein(Rap1gap)
ENSMUSG00000028426	RAD23B	Mus musculus	RAD23 homolog B, nucleotide excision repair protein(Rad23b)
ENSMUSG00000022037	CLU	Mus musculus	clusterin(Clu)
ENSMUSG00000028420	TMEM38B	Mus musculus	transmembrane protein 38B(Tmem38b)
ENSMUSG00000022033	PBK	Mus musculus	PDZ binding kinase(Pbk)
ENSMUSG00000022034	ESCO2	Mus musculus	establishment of sister chromatid cohesion N-acetyltransferase 2(Esco2)
ENSMUSG00000028007	SNX7	Mus musculus	sorting nexin 7(Snx7)
ENSMUSG00000030753	PRKRIR	Mus musculus	protein-kinase, interferon-inducible double stranded RNA dependent inhibitor, repressor of (P58 repressor)(Prkrir)
ENSMUSG00000025474	TUBGCP2	Mus musculus	tubulin, gamma complex associated protein 2(Tubgcp2)
ENSMUSG00000041355	SSR2	Mus musculus	signal sequence receptor, beta(Ssr2)
ENSMUSG00000025867	CPLX2	Mus musculus	complexin 2(Cplx2)
ENSMUSG00000006435	Neurl1a	Mus musculus	neuralized E3 ubiquitin protein ligase 1A(Neurl1a)
ENSMUSG00000033685	UCP2	Mus musculus	uncoupling protein 2 (mitochondrial, proton carrier)(Ucp2)
ENSMUSG00000038323	1700066M21Rik	Mus musculus	RIKEN cDNA 1700066M21 gene(1700066M21Rik)
ENSMUSG00000022451	TWF1	Mus musculus	twinfilin actin binding protein 1(Twf1)
ENSMUSG00000028051	HCN3	Mus musculus	hyperpolarization-activated, cyclic nucleotide-gated K+ 3(Hcn3)
ENSMUSG00000022456	SEPT3	Mus musculus	septin 3(Sept3)
ENSMUSG00000091764	Zfp964	Mus musculus	zinc finger protein 964(Zfp964)
ENSMUSG00000071415	RPL23	Mus musculus	ribosomal protein L23(Rpl23)
ENSMUSG00000028847	TRAPPC3	Mus musculus	trafficking protein particle complex 3(Trappc3)
ENSMUSG00000032977	FAM207A	Mus musculus	family with sequence similarity 207, member A(Fam207a)
ENSMUSG00000069835	SAT2	Mus musculus	spermidine/spermine N1-acetyl transferase 2(Sat2)
ENSMUSG00000028845	TEKT2	Mus musculus	tektin 2(Tekt2)
ENSMUSG00000025402	nab2	Mus musculus	Ngfi-A binding protein 2(Nab2)
ENSMUSG00000028059	ARHGEF2	Mus musculus	rho/rac guanine nucleotide exchange factor (GEF) 2(Arhgef2)
ENSMUSG00000024827	GLDC	Mus musculus	glycine decarboxylase(Gldc)
ENSMUSG00000032589	BSN	Mus musculus	bassoon(Bsn)
ENSMUSG00000090124	Ugt1a7c	Mus musculus	UDP glucuronosyltransferase 1 family, polypeptide A7C(Ugt1a7c)
ENSMUSG00000022462	SLC38A2	Mus musculus	solute carrier family 38, member 2(Slc38a2)
ENSMUSG00000028062	LAMTOR2	Mus musculus	late endosomal/lysosomal adaptor, MAPK and MTOR activator 2(Lamtor2)
ENSMUSG00000079033	2310045n01rik-mef2b	Mus musculus	2310045N01Rik-mef2b readthrough(2310045n01rik-mef2b)
ENSMUSG00000040247	TBC1D10C	Mus musculus	TBC1 domain family, member 10c(Tbc1d10c)
ENSMUSG00000036617	ETL4	Mus musculus	enhancer trap locus 4(Etl4)
ENSMUSG00000015647	LAMA5	Mus musculus	laminin, alpha 5(Lama5)
ENSMUSG00000031865	DCTN1	Mus musculus	dynactin 1(Dctn1)
ENSMUSG00000028836	SLC30A2	Mus musculus	solute carrier family 30 (zinc transporter), member 2(Slc30a2)
ENSMUSG00000028830	AU040320	Mus musculus	expressed sequence AU040320(AU040320)
ENSMUSG00000024811	TNKS2	Mus musculus	tankyrase, TRF1-interacting ankyrin-related ADP-ribose polymerase 2(Tnks2)
ENSMUSG00000008318	RELT	Mus musculus	RELT tumor necrosis factor receptor(Relt)
ENSMUSG00000057530	ECE1	Mus musculus	endothelin converting enzyme 1(Ece1)
ENSMUSG00000031860	PBX4	Mus musculus	pre B cell leukemia homeobox 4(Pbx4)
ENSMUSG00000024817	UHRF2	Mus musculus	ubiquitin-like, containing PHD and RING finger domains 2(Uhrf2)
ENSMUSG00000090112	SHPRH	Mus musculus	SNF2 histone linker PHD RING helicase(Shprh)
ENSMUSG00000040258	NXPH4	Mus musculus	neurexophilin 4(Nxph4)
ENSMUSG00000040785	TTC3	Mus musculus	tetratricopeptide repeat domain 3(Ttc3)
ENSMUSG00000060038	DHPS	Mus musculus	deoxyhypusine synthase(Dhps)
ENSMUSG00000028035	DNAJB4	Mus musculus	DnaJ heat shock protein family (Hsp40) member B4(Dnajb4)
ENSMUSG00000035621	MIDN	Mus musculus	midnolin(Midn)
ENSMUSG00000022472	DESI1	Mus musculus	desumoylating isopeptidase 1(Desi1)
ENSMUSG00000066839	ECSIT	Mus musculus	ECSIT signalling integrator(Ecsit)
ENSMUSG00000010122	SLC47A1	Mus musculus	solute carrier family 47, member 1(Slc47a1)
ENSMUSG00000005354	TXN2	Mus musculus	thioredoxin 2(Txn2)
ENSMUSG00000053329	D10Jhu81e	Mus musculus	DNA segment, Chr 10, Johns Hopkins University 81 expressed(D10Jhu81e)
ENSMUSG00000032998	FOXJ3	Mus musculus	forkhead box J3(Foxj3)
ENSMUSG00000034509	MAD2L1BP	Mus musculus	MAD2L1 binding protein(Mad2l1bp)
ENSMUSG00000031851	NTPCR	Mus musculus	nucleoside-triphosphatase, cancer-related(Ntpcr)
ENSMUSG00000025421	HDHD2	Mus musculus	haloacid dehalogenase-like hydrolase domain containing 2(Hdhd2)
ENSMUSG00000024807	SYVN1	Mus musculus	synovial apoptosis inhibitor 1, synoviolin(Syvn1)
ENSMUSG00000021470	ERCC6L2	Mus musculus	excision repair cross-complementing rodent repair deficiency, complementation group 6 like 2(Ercc6l2)
ENSMUSG00000007216	Zfp775	Mus musculus	zinc finger protein 775(Zfp775)
ENSMUSG00000021474	SFXN1	Mus musculus	sideroflexin 1(Sfxn1)
ENSMUSG00000025427	RNF165	Mus musculus	ring finger protein 165(Rnf165)
ENSMUSG00000058022	ADTRP	Mus musculus	androgen dependent TFPI regulating protein(Adtrp)
ENSMUSG00000005732	RANBP1	Mus musculus	RAN binding protein 1(Ranbp1)
ENSMUSG00000046317	BC107364	Mus musculus	cDNA sequence BC107364(BC107364)
ENSMUSG00000046318	CCBE1	Mus musculus	collagen and calcium binding EGF domains 1(Ccbe1)
ENSMUSG00000069041	SLC25A31	Mus musculus	solute carrier family 25 (mitochondrial carrier; adenine nucleotide translocator), member 31(Slc25a31)
ENSMUSG00000035626	Olfr1509	Mus musculus	olfactory receptor 1509(Olfr1509)
ENSMUSG00000040782	RFWD2	Mus musculus	ring finger and WD repeat domain 2(Rfwd2)
ENSMUSG00000028040	EFNA4	Mus musculus	ephrin A4(Efna4)
ENSMUSG00000049288	LIX1L	Mus musculus	Lix1-like(Lix1l)
ENSMUSG00000040268	PLEKHA1	Mus musculus	pleckstrin homology domain containing, family A (phosphoinositide binding specific) member 1(Plekha1)
ENSMUSG00000041399	1700013G24Rik	Mus musculus	RIKEN cDNA 1700013G24 gene(1700013G24Rik)
ENSMUSG00000031848	LSM4	Mus musculus	LSM4 homolog, U6 small nuclear RNA and mRNA degradation associated(Lsm4)
ENSMUSG00000022483	COL2A1	Mus musculus	collagen, type II, alpha 1(Col2a1)
ENSMUSG00000025436	xrcc6bp1	Mus musculus	XRCC6 binding protein 1(Xrcc6bp1)
ENSMUSG00000031847	1700030J22Rik	Mus musculus	RIKEN cDNA 1700030J22 gene(1700030J22Rik)
ENSMUSG00000053338	TARM1	Mus musculus	T cell-interacting, activating receptor on myeloid cells 1(Tarm1)
ENSMUSG00000003731	KPNA6	Mus musculus	karyopherin (importin) alpha 6(Kpna6)
ENSMUSG00000074607	TOX2	Mus musculus	TOX high mobility group box family member 2(Tox2)
ENSMUSG00000050912	TMEM123	Mus musculus	transmembrane protein 123(Tmem123)
ENSMUSG00000036632	ALG5	Mus musculus	asparagine-linked glycosylation 5 (dolichyl-phosphate beta-glucosyltransferase)(Alg5)
ENSMUSG00000007209	Ceacam9	Mus musculus	carcinoembryonic antigen-related cell adhesion molecule 9(Ceacam9)
ENSMUSG00000069053	Uba1y	Mus musculus	ubiquitin-activating enzyme, Chr Y(Uba1y)
ENSMUSG00000046329	SLC25A23	Mus musculus	solute carrier family 25 (mitochondrial carrier; phosphate carrier), member 23(Slc25a23)
ENSMUSG00000040729	CEP126	Mus musculus	centrosomal protein 126(Cep126)
ENSMUSG00000002105	SLC39A13	Mus musculus	solute carrier family 39 (metal ion transporter), member 13(Slc39a13)
ENSMUSG00000022490	PPP1R1A	Mus musculus	protein phosphatase 1, regulatory (inhibitor) subunit 1A(Ppp1r1a)
ENSMUSG00000040725	HNRNPUL1	Mus musculus	heterogeneous nuclear ribonucleoprotein U-like 1(Hnrnpul1)
ENSMUSG00000032540	ABHD5	Mus musculus	abhydrolase domain containing 5(Abhd5)
ENSMUSG00000004364	CUL3	Mus musculus	cullin 3(Cul3)
ENSMUSG00000070871	CCNYL1	Mus musculus	cyclin Y-like 1(Ccnyl1)
ENSMUSG00000050157	Gm867	Mus musculus	predicted gene 867(Gm867)
ENSMUSG00000017418	ARL5B	Mus musculus	ADP-ribosylation factor-like 5B(Arl5b)
ENSMUSG00000034522	Zfp395	Mus musculus	zinc finger protein 395(Zfp395)
ENSMUSG00000060090	RP2	Mus musculus	retinitis pigmentosa 2 homolog(Rp2)
ENSMUSG00000032946	RASGRP2	Mus musculus	RAS, guanyl releasing protein 2(Rasgrp2)
ENSMUSG00000034518	HMGXB4	Mus musculus	HMG box domain containing 4(Hmgxb4)
ENSMUSG00000043131	mob1a	Mus musculus	MOB kinase activator 1A(Mob1a)
ENSMUSG00000032940	RBM11	Mus musculus	RNA binding motif protein 11(Rbm11)
ENSMUSG00000040714	KLC3	Mus musculus	kinesin light chain 3(Klc3)
ENSMUSG00000068740	CELSR2	Mus musculus	cadherin, EGF LAG seven-pass G-type receptor 2(Celsr2)
ENSMUSG00000075028	Prdm11	Mus musculus	PR domain containing 11(Prdm11)
ENSMUSG00000050164	MCHR1	Mus musculus	melanin-concentrating hormone receptor 1(Mchr1)
ENSMUSG00000049265	KCNK3	Mus musculus	potassium channel, subfamily K, member 3(Kcnk3)
ENSMUSG00000068748	PTPRZ1	Mus musculus	protein tyrosine phosphatase, receptor type Z, polypeptide 1(Ptprz1)
ENSMUSG00000022095	FAM160B2	Mus musculus	family with sequence similarity 160, member B2(Fam160b2)
ENSMUSG00000042476	ABCB4	Mus musculus	ATP-binding cassette, sub-family B (MDR/TAP), member 4(Abcb4)
ENSMUSG00000013465	NELFB	Mus musculus	negative elongation factor complex member B(Nelfb)
ENSMUSG00000022098	BMP1	Mus musculus	bone morphogenetic protein 1(Bmp1)
ENSMUSG00000024858	GRK2	Mus musculus	G protein-coupled receptor kinase 2(Grk2)
ENSMUSG00000019539	RCN3	Mus musculus	reticulocalbin 3, EF-hand calcium binding domain(Rcn3)
ENSMUSG00000043102	QRFP	Mus musculus	pyroglutamylated RFamide peptide(Qrfp)
ENSMUSG00000032952	AP4B1	Mus musculus	adaptor-related protein complex AP-4, beta 1(Ap4b1)
ENSMUSG00000005397	NID1	Mus musculus	nidogen 1(Nid1)
ENSMUSG00000058454	DHCR7	Mus musculus	7-dehydrocholesterol reductase(Dhcr7)
ENSMUSG00000031898	DPEP3	Mus musculus	dipeptidase 3(Dpep3)
ENSMUSG00000040213	KYAT3	Mus musculus	kynurenine aminotransferase 3(Kyat3)
ENSMUSG00000074635	3110070M22Rik	Mus musculus	RIKEN cDNA 3110070M22 gene(3110070M22Rik)
ENSMUSG00000049252	LRP1B	Mus musculus	low density lipoprotein-related protein 1B (deleted in tumors)(Lrp1b)
ENSMUSG00000032562	GNAI2	Mus musculus	guanine nucleotide binding protein (G protein), alpha inhibiting 2(Gnai2)
ENSMUSG00000028078	DCLK2	Mus musculus	doublecortin-like kinase 2(Dclk2)
ENSMUSG00000042462	DCTPP1	Mus musculus	dCTP pyrophosphatase 1(Dctpp1)
ENSMUSG00000060073	PSMA3	Mus musculus	proteasome (prosome, macropain) subunit, alpha type 3(Psma3)
ENSMUSG00000050965	PRKCA	Mus musculus	protein kinase C, alpha(Prkca)
ENSMUSG00000036687	TMEM184A	Mus musculus	transmembrane protein 184a(Tmem184a)
ENSMUSG00000061536	SEC22C	Mus musculus	SEC22 homolog C, vesicle trafficking protein(Sec22c)
ENSMUSG00000034544	RSRC1	Mus musculus	arginine/serine-rich coiled-coil 1(Rsrc1)
ENSMUSG00000028896	RCC1	Mus musculus	regulator of chromosome condensation 1(Rcc1)
ENSMUSG00000002111	SPI1	Mus musculus	spleen focus forming virus (SFFV) proviral integration oncogene(Spi1)
ENSMUSG00000024830	RPS6KB2	Mus musculus	ribosomal protein S6 kinase, polypeptide 2(Rps6kb2)
ENSMUSG00000032965	IFT57	Mus musculus	intraflagellar transport 57(Ift57)
ENSMUSG00000031889	D230025D16Rik	Mus musculus	RIKEN cDNA D230025D16 gene(D230025D16Rik)
ENSMUSG00000028898	TRNAU1AP	Mus musculus	tRNA selenocysteine 1 associated protein 1(Trnau1ap)
ENSMUSG00000043505	GIMAP5	Mus musculus	GTPase, IMAP family member 5(Gimap5)
ENSMUSG00000032553	SRPRB	Mus musculus	signal recognition particle receptor, B subunit(Srprb)
ENSMUSG00000074643	CPNE1	Mus musculus	copine I(Cpne1)
ENSMUSG00000028089	CHD1L	Mus musculus	chromodomain helicase DNA binding protein 1-like(Chd1l)
ENSMUSG00000028893	SESN2	Mus musculus	sestrin 2(Sesn2)
ENSMUSG00000032557	UBA5	Mus musculus	ubiquitin-like modifier activating enzyme 5(Uba5)
ENSMUSG00000075000	NRBF2	Mus musculus	nuclear receptor binding factor 2(Nrbf2)
ENSMUSG00000043929	KLHL15	Mus musculus	kelch-like 15(Klhl15)
ENSMUSG00000031883	Car7	Mus musculus	carbonic anhydrase 7(Car7)
ENSMUSG00000031881	CDH16	Mus musculus	cadherin 16(Cdh16)
ENSMUSG00000038507	PARP12	Mus musculus	poly (ADP-ribose) polymerase family, member 12(Parp12)
ENSMUSG00000005763	CD247	Mus musculus	CD247 antigen(Cd247)
ENSMUSG00000066880	Zfp617	Mus musculus	zinc finger protein 617(Zfp617)
ENSMUSG00000024835	CORO1B	Mus musculus	coronin, actin binding protein 1B(Coro1b)
ENSMUSG00000032199	polr2m	Mus musculus	polymerase (RNA) II (DNA directed) polypeptide M(Polr2m)
ENSMUSG00000048582	GJA3	Mus musculus	gap junction protein, alpha 3(Gja3)
ENSMUSG00000048581	E130311K13Rik	Mus musculus	RIKEN cDNA E130311K13 gene(E130311K13Rik)
ENSMUSG00000050088	1600012H06Rik	Mus musculus	RIKEN cDNA 1600012H06 gene(1600012H06Rik)
ENSMUSG00000047940	STPG2	Mus musculus	sperm tail PG rich repeat containing 2(Stpg2)
ENSMUSG00000035572	DCAF10	Mus musculus	DDB1 and CUL4 associated factor 10(Dcaf10)
ENSMUSG00000043059	Zfp513	Mus musculus	zinc finger protein 513(Zfp513)
ENSMUSG00000024773	ATG2A	Mus musculus	autophagy related 2A(Atg2a)
ENSMUSG00000049225	PDP1	Mus musculus	pyruvate dehyrogenase phosphatase catalytic subunit 1(Pdp1)
ENSMUSG00000047045	TMEM164	Mus musculus	transmembrane protein 164(Tmem164)
ENSMUSG00000064247	PLCXD1	Mus musculus	phosphatidylinositol-specific phospholipase C, X domain containing 1(Plcxd1)
ENSMUSG00000035569	ANKRD11	Mus musculus	ankyrin repeat domain 11(Ankrd11)
ENSMUSG00000044117	2900011O08Rik	Mus musculus	RIKEN cDNA 2900011O08 gene(2900011O08Rik)
ENSMUSG00000063626	UNC5D	Mus musculus	unc-5 netrin receptor D(Unc5d)
ENSMUSG00000035561	ALDH1B1	Mus musculus	aldehyde dehydrogenase 1 family, member B1(Aldh1b1)
ENSMUSG00000024780	CDC37L1	Mus musculus	cell division cycle 37-like 1(Cdc37l1)
ENSMUSG00000034037	FGD5	Mus musculus	FYVE, RhoGEF and PH domain containing 5(Fgd5)
ENSMUSG00000057842	Zfp595	Mus musculus	zinc finger protein 595(Zfp595)
ENSMUSG00000074698	CSNK2A1	Mus musculus	casein kinase 2, alpha 1 polypeptide(Csnk2a1)
ENSMUSG00000004328	HIF3A	Mus musculus	hypoxia inducible factor 3, alpha subunit(Hif3a)
ENSMUSG00000024787	SNX15	Mus musculus	sorting nexin 15(Snx15)
ENSMUSG00000001521	TULP3	Mus musculus	tubby-like protein 3(Tulp3)
ENSMUSG00000024782	AK3	Mus musculus	adenylate kinase 3(Ak3)
ENSMUSG00000034450	Gulo	Mus musculus	gulonolactone (L-) oxidase(Gulo)
ENSMUSG00000056770	SETD3	Mus musculus	SET domain containing 3(Setd3)
ENSMUSG00000063659	zbtb18	Mus musculus	zinc finger and BTB domain containing 18(Zbtb18)
ENSMUSG00000017428	PSMD11	Mus musculus	proteasome (prosome, macropain) 26S subunit, non-ATPase, 11(Psmd11)
ENSMUSG00000020412	ASCC2	Mus musculus	activating signal cointegrator 1 complex subunit 2(Ascc2)
ENSMUSG00000024750	ZFAND5	Mus musculus	zinc finger, AN1-type domain 5(Zfand5)
ENSMUSG00000069769	MSI2	Mus musculus	musashi RNA-binding protein 2(Msi2)
ENSMUSG00000043036	CCDC63	Mus musculus	coiled-coil domain containing 63(Ccdc63)
ENSMUSG00000018906	P4HA2	Mus musculus	procollagen-proline, 2-oxoglutarate 4-dioxygenase (proline 4-hydroxylase), alpha II polypeptide(P4ha2)
ENSMUSG00000057469	E2F6	Mus musculus	E2F transcription factor 6(E2f6)
ENSMUSG00000044573	ACP1	Mus musculus	acid phosphatase 1, soluble(Acp1)
ENSMUSG00000024769	CDC42BPG	Mus musculus	CDC42 binding protein kinase gamma (DMPK-like)(Cdc42bpg)
ENSMUSG00000052609	PLEKHG3	Mus musculus	pleckstrin homology domain containing, family G (with RhoGef domain) member 3(Plekhg3)
ENSMUSG00000034462	PKD2	Mus musculus	polycystic kidney disease 2(Pkd2)
ENSMUSG00000003680	TAF6L	Mus musculus	TATA-box binding protein associated factor 6 like(Taf6l)
ENSMUSG00000057465	SAA2	Mus musculus	serum amyloid A 2(Saa2)
ENSMUSG00000018909	ARRB1	Mus musculus	arrestin, beta 1(Arrb1)
ENSMUSG00000044576	GAREM2	Mus musculus	GRB2 associated regulator of MAPK1 subtype 2(Garem2)
ENSMUSG00000073968	TRIM68	Mus musculus	tripartite motif-containing 68(Trim68)
ENSMUSG00000062210	TNFAIP8	Mus musculus	tumor necrosis factor, alpha-induced protein 8(Tnfaip8)
ENSMUSG00000022517	MGRN1	Mus musculus	mahogunin, ring finger 1(Mgrn1)
ENSMUSG00000070972	DNAJC25	Mus musculus	DnaJ heat shock protein family (Hsp40) member C25(Dnajc25)
ENSMUSG00000044134	FAM109A	Mus musculus	family with sequence similarity 109, member A(Fam109a)
ENSMUSG00000001542	ELL2	Mus musculus	elongation factor RNA polymerase II 2(Ell2)
ENSMUSG00000016346	KCNQ2	Mus musculus	potassium voltage-gated channel, subfamily Q, member 2(Kcnq2)
ENSMUSG00000034471	CASKIN2	Mus musculus	CASK-interacting protein 2(Caskin2)
ENSMUSG00000031822	GSE1	Mus musculus	genetic suppressor element 1, coiled-coil protein(Gse1)
ENSMUSG00000032217	RNF111	Mus musculus	ring finger 111(Rnf111)
ENSMUSG00000031015	SWAP70	Mus musculus	SWA-70 protein(Swap70)
ENSMUSG00000034083	CCDC174	Mus musculus	coiled-coil domain containing 174(Ccdc174)
ENSMUSG00000017861	MYBL2	Mus musculus	myeloblastosis oncogene-like 2(Mybl2)
ENSMUSG00000030352	TSPAN9	Mus musculus	tetraspanin 9(Tspan9)
ENSMUSG00000000901	MMP11	Mus musculus	matrix metallopeptidase 11(Mmp11)
ENSMUSG00000022540	ROGDI	Mus musculus	rogdi homolog(Rogdi)
ENSMUSG00000057897	CAMK2B	Mus musculus	calcium/calmodulin-dependent protein kinase II, beta(Camk2b)
ENSMUSG00000058997	VWA8	Mus musculus	von Willebrand factor A domain containing 8(Vwa8)
ENSMUSG00000041731	PGM5	Mus musculus	phosphoglucomutase 5(Pgm5)
ENSMUSG00000056763	CSPP1	Mus musculus	centrosome and spindle pole associated protein 1(Cspp1)
ENSMUSG00000090206	TEPP	Mus musculus	testis, prostate and placenta expressed(Tepp)
ENSMUSG00000021379	ID4	Mus musculus	inhibitor of DNA binding 4(Id4)
ENSMUSG00000036707	CAB39	Mus musculus	calcium binding protein 39(Cab39)
ENSMUSG00000031833	MAST3	Mus musculus	microtubule associated serine/threonine kinase 3(Mast3)
ENSMUSG00000096146	KCNJ11	Mus musculus	potassium inwardly rectifying channel, subfamily J, member 11(Kcnj11)
ENSMUSG00000068697	MYOZ1	Mus musculus	myozenin 1(Myoz1)
ENSMUSG00000031839	HSBP1	Mus musculus	heat shock factor binding protein 1(Hsbp1)
ENSMUSG00000015745	PLEKHO1	Mus musculus	pleckstrin homology domain containing, family O member 1(Plekho1)
ENSMUSG00000021381	BARX1	Mus musculus	BarH-like homeobox 1(Barx1)
ENSMUSG00000017466	TIMP2	Mus musculus	tissue inhibitor of metalloproteinase 2(Timp2)
ENSMUSG00000009545	KCNQ1	Mus musculus	potassium voltage-gated channel, subfamily Q, member 1(Kcnq1)
ENSMUSG00000046404	YOD1	Mus musculus	YOD1 deubiquitinase(Yod1)
ENSMUSG00000026510	Trp53bp2	Mus musculus	transformation related protein 53 binding protein 2(Trp53bp2)
ENSMUSG00000032235	ice2	Mus musculus	interactor of little elongation complex ELL subunit 2(Ice2)
ENSMUSG00000070939	TGFBRAP1	Mus musculus	transforming growth factor, beta receptor associated protein 1(Tgfbrap1)
ENSMUSG00000044548	DACT1	Mus musculus	dishevelled-binding antagonist of beta-catenin 1(Dact1)
ENSMUSG00000024798	HTR7	Mus musculus	5-hydroxytryptamine (serotonin) receptor 7(Htr7)
ENSMUSG00000071076	jund	Mus musculus	jun D proto-oncogene(Jund)
ENSMUSG00000003810	mast2	Mus musculus	microtubule associated serine/threonine kinase 2(Mast2)
ENSMUSG00000043079	SYNPO	Mus musculus	synaptopodin(Synpo)
ENSMUSG00000060002	CHPT1	Mus musculus	choline phosphotransferase 1(Chpt1)
ENSMUSG00000031807	PGLS	Mus musculus	6-phosphogluconolactonase(Pgls)
ENSMUSG00000022562	OPLAH	Mus musculus	5-oxoprolinase (ATP-hydrolysing)(Oplah)
ENSMUSG00000022561	GPAA1	Mus musculus	GPI anchor attachment protein 1(Gpaa1)
ENSMUSG00000030376	SLC8A2	Mus musculus	solute carrier family 8 (sodium/calcium exchanger), member 2(Slc8a2)
ENSMUSG00000026519	TMEM63A	Mus musculus	transmembrane protein 63a(Tmem63a)
ENSMUSG00000030374	STRN4	Mus musculus	striatin, calmodulin binding protein 4(Strn4)
ENSMUSG00000021391	CENPP	Mus musculus	centromere protein P(Cenpp)
ENSMUSG00000032245	CLN6	Mus musculus	ceroid-lipofuscinosis, neuronal 6(Cln6)
ENSMUSG00000044949	UBTD2	Mus musculus	ubiquitin domain containing 2(Ubtd2)
ENSMUSG00000031021	TMEM9B	Mus musculus	TMEM9 domain family, member B(Tmem9b)
ENSMUSG00000041757	PLEKHA6	Mus musculus	pleckstrin homology domain containing, family A member 6(Plekha6)
ENSMUSG00000021395	SPIN1	Mus musculus	spindlin 1(Spin1)
ENSMUSG00000001583	TNK1	Mus musculus	tyrosine kinase, non-receptor, 1(Tnk1)
ENSMUSG00000031812	MAP1LC3B	Mus musculus	microtubule-associated protein 1 light chain 3 beta(Map1lc3b)
ENSMUSG00000022551	Cyc1	Mus musculus	cytochrome c-1(Cyc1)
ENSMUSG00000035545	LENG8	Mus musculus	leukocyte receptor cluster (LRC) member 8(Leng8)
ENSMUSG00000057863	RPL36	Mus musculus	ribosomal protein L36(Rpl36)
ENSMUSG00000031816	MTHFSD	Mus musculus	methenyltetrahydrofolate synthetase domain containing(Mthfsd)
ENSMUSG00000015759	CNIH1	Mus musculus	cornichon family AMPA receptor auxiliary protein 1(Cnih1)
ENSMUSG00000022555	DGAT1	Mus musculus	diacylglycerol O-acyltransferase 1(Dgat1)
ENSMUSG00000050505	pcdh20	Mus musculus	protocadherin 20(Pcdh20)
ENSMUSG00000033581	IGF2BP2	Mus musculus	insulin-like growth factor 2 mRNA binding protein 2(Igf2bp2)
ENSMUSG00000031442	MCF2L	Mus musculus	mcf.2 transforming sequence-like(Mcf2l)
ENSMUSG00000020473	AEBP1	Mus musculus	AE binding protein 1(Aebp1)
ENSMUSG00000038388	MPP6	Mus musculus	membrane protein, palmitoylated 6 (MAGUK p55 subfamily member 6)(Mpp6)
ENSMUSG00000030739	MYH14	Mus musculus	myosin, heavy polypeptide 14(Myh14)
ENSMUSG00000001089	LUZP1	Mus musculus	leucine zipper protein 1(Luzp1)
ENSMUSG00000029436	MMP17	Mus musculus	matrix metallopeptidase 17(Mmp17)
ENSMUSG00000026942	TRAF2	Mus musculus	TNF receptor-associated factor 2(Traf2)
ENSMUSG00000074217	2210011C24Rik	Mus musculus	RIKEN cDNA 2210011C24 gene(2210011C24Rik)
ENSMUSG00000018572	PHF23	Mus musculus	PHD finger protein 23(Phf23)
ENSMUSG00000037376	TRMT6	Mus musculus	tRNA methyltransferase 6(Trmt6)
ENSMUSG00000070366	PLPP4	Mus musculus	phospholipid phosphatase 4(Plpp4)
ENSMUSG00000020882	CACNB1	Mus musculus	calcium channel, voltage-dependent, beta 1 subunit(Cacnb1)
ENSMUSG00000028443	NUDT2	Mus musculus	nudix (nucleoside diphosphate linked moiety X)-type motif 2(Nudt2)
ENSMUSG00000025920	STAU2	Mus musculus	staufen (RNA binding protein) homolog 2 (Drosophila)(Stau2)
ENSMUSG00000037373	CTBP1	Mus musculus	C-terminal binding protein 1(Ctbp1)
ENSMUSG00000048503	TMEM136	Mus musculus	transmembrane protein 136(Tmem136)
ENSMUSG00000029810	TMEM176B	Mus musculus	transmembrane protein 176B(Tmem176b)
ENSMUSG00000030313	DENND5B	Mus musculus	DENN/MADD domain containing 5B(Dennd5b)
ENSMUSG00000030314	ATG7	Mus musculus	autophagy related 7(Atg7)
ENSMUSG00000033597	CASKIN1	Mus musculus	CASK interacting protein 1(Caskin1)
ENSMUSG00000007594	HAPLN4	Mus musculus	hyaluronan and proteoglycan link protein 4(Hapln4)
ENSMUSG00000030747	DGAT2	Mus musculus	diacylglycerol O-acyltransferase 2(Dgat2)
ENSMUSG00000029423	PIWIL1	Mus musculus	piwi-like RNA-mediated gene silencing 1(Piwil1)
ENSMUSG00000033590	MYO5C	Mus musculus	myosin VC(Myo5c)
ENSMUSG00000038371	SBF2	Mus musculus	SET binding factor 2(Sbf2)
ENSMUSG00000030741	SPNS1	Mus musculus	spinster homolog 1(Spns1)
ENSMUSG00000029428	STX2	Mus musculus	syntaxin 2(Stx2)
ENSMUSG00000026932	NACC2	Mus musculus	nucleus accumbens associated 2, BEN and BTB (POZ) domain containing(Nacc2)
ENSMUSG00000096188	CMTM4	Mus musculus	CKLF-like MARVEL transmembrane domain containing 4(Cmtm4)
ENSMUSG00000029036	ATAD3A	Mus musculus	ATPase family, AAA domain containing 3A(Atad3a)
ENSMUSG00000053716	DUSP7	Mus musculus	dual specificity phosphatase 7(Dusp7)
ENSMUSG00000079557	MARCH2	Mus musculus	membrane-associated ring finger (C3HC4) 2(March2)
ENSMUSG00000011256	ADAM19	Mus musculus	a disintegrin and metallopeptidase domain 19 (meltrin beta)(Adam19)
ENSMUSG00000015247	NIPSNAP3B	Mus musculus	nipsnap homolog 3B (C. elegans)(Nipsnap3b)
ENSMUSG00000026546	CFAP45	Mus musculus	cilia and flagella associated protein 45(Cfap45)
ENSMUSG00000031458	COPRS	Mus musculus	coordinator of PRMT5, differentiation stimulator(Coprs)
ENSMUSG00000029802	ABCG2	Mus musculus	ATP-binding cassette, sub-family G (WHITE), member 2(Abcg2)
ENSMUSG00000038366	LASP1	Mus musculus	LIM and SH3 protein 1(Lasp1)
ENSMUSG00000055128	CGRRF1	Mus musculus	cell growth regulator with ring finger domain 1(Cgrrf1)
ENSMUSG00000030711	SULT1A1	Mus musculus	sulfotransferase family 1A, phenol-preferring, member 1(Sult1a1)
ENSMUSG00000045639	Zfp629	Mus musculus	zinc finger protein 629(Zfp629)
ENSMUSG00000029415	SDAD1	Mus musculus	SDA1 domain containing 1(Sdad1)
ENSMUSG00000002728	NAA20	Mus musculus	N(alpha)-acetyltransferase 20, NatB catalytic subunit(Naa20)
ENSMUSG00000018554	YBX2	Mus musculus	Y box protein 2(Ybx2)
ENSMUSG00000052794	1700030K09Rik	Mus musculus	RIKEN cDNA 1700030K09 gene(1700030K09Rik)
ENSMUSG00000040653	PPP1R14C	Mus musculus	protein phosphatase 1, regulatory (inhibitor) subunit 14c(Ppp1r14c)
ENSMUSG00000061175	FNIP2	Mus musculus	folliculin interacting protein 2(Fnip2)
ENSMUSG00000026201	STK16	Mus musculus	serine/threonine kinase 16(Stk16)
ENSMUSG00000011267	Zfp296	Mus musculus	zinc finger protein 296(Zfp296)
ENSMUSG00000030339	LTBR	Mus musculus	lymphotoxin B receptor(Ltbr)
ENSMUSG00000030726	POLD3	Mus musculus	polymerase (DNA-directed), delta 3, accessory subunit(Pold3)
ENSMUSG00000045268	Zfp691	Mus musculus	zinc finger protein 691(Zfp691)
ENSMUSG00000029407	USO1	Mus musculus	USO1 vesicle docking factor(Uso1)
ENSMUSG00000026955	SAPCD2	Mus musculus	suppressor APC domain containing 2(Sapcd2)
ENSMUSG00000038351	SGSM2	Mus musculus	small G protein signaling modulator 2(Sgsm2)
ENSMUSG00000040669	PHC1	Mus musculus	polyhomeotic-like 1 (Drosophila)(Phc1)
ENSMUSG00000049680	URGCP	Mus musculus	upregulator of cell proliferation(Urgcp)
ENSMUSG00000037349	NUDT22	Mus musculus	nudix (nucleoside diphosphate linked moiety X)-type motif 22(Nudt22)
ENSMUSG00000031478	NEK3	Mus musculus	NIMA (never in mitosis gene a)-related expressed kinase 3(Nek3)
ENSMUSG00000021958	PINX1	Mus musculus	PIN2/TERF1 interacting, telomerase inhibitor 1(Pinx1)
ENSMUSG00000018569	CLDN7	Mus musculus	claudin 7(Cldn7)
ENSMUSG00000031479	VPS36	Mus musculus	vacuolar protein sorting 36(Vps36)
ENSMUSG00000014668	CHFR	Mus musculus	checkpoint with forkhead and ring finger domains(Chfr)
ENSMUSG00000028458	TESK1	Mus musculus	testis specific protein kinase 1(Tesk1)
ENSMUSG00000029821	DFNA5	Mus musculus	deafness, autosomal dominant 5 (human)(Dfna5)
ENSMUSG00000037341	SLC9A7	Mus musculus	solute carrier family 9 (sodium/hydrogen exchanger), member 7(Slc9a7)
ENSMUSG00000028456	UNC13B	Mus musculus	unc-13 homolog B (C. elegans)(Unc13b)
ENSMUSG00000036275	9530068E07Rik	Mus musculus	RIKEN cDNA 9530068E07 gene(9530068E07Rik)
ENSMUSG00000050553	GK2	Mus musculus	glycerol kinase 2(Gk2)
ENSMUSG00000036273	LRRK2	Mus musculus	leucine-rich repeat kinase 2(Lrrk2)
ENSMUSG00000045659	PLEKHA7	Mus musculus	pleckstrin homology domain containing, family A member 7(Plekha7)
ENSMUSG00000029071	DVL1	Mus musculus	dishevelled segment polarity protein 1(Dvl1)
ENSMUSG00000079508	APOO	Mus musculus	apolipoprotein O(Apoo)
ENSMUSG00000020848	doc2b	Mus musculus	double C2, beta(Doc2b)
ENSMUSG00000029471	CAMKK2	Mus musculus	calcium/calmodulin-dependent protein kinase kinase 2, beta(Camkk2)
ENSMUSG00000031486	ADGRA2	Mus musculus	adhesion G protein-coupled receptor A2(Adgra2)
ENSMUSG00000045211	NUDT18	Mus musculus	nudix (nucleoside diphosphate linked moiety X)-type motif 18(Nudt18)
ENSMUSG00000054065	PKP3	Mus musculus	plakophilin 3(Pkp3)
ENSMUSG00000029475	KDM2B	Mus musculus	lysine (K)-specific demethylase 2B(Kdm2b)
ENSMUSG00000020431	ADCY1	Mus musculus	adenylate cyclase 1(Adcy1)
ENSMUSG00000026227	2810459M11Rik	Mus musculus	RIKEN cDNA 2810459M11 gene(2810459M11Rik)
ENSMUSG00000020435	OSBP2	Mus musculus	oxysterol binding protein 2(Osbp2)
ENSMUSG00000021969	ZDHHC20	Mus musculus	zinc finger, DHHC domain containing 20(Zdhhc20)
ENSMUSG00000020437	MYO1G	Mus musculus	myosin IG(Myo1g)
ENSMUSG00000029480	dhx37	Mus musculus	DEAH (Asp-Glu-Ala-His) box polypeptide 37(Dhx37)
ENSMUSG00000057816	1700007G11Rik	Mus musculus	RIKEN cDNA 1700007G11 gene(1700007G11Rik)
ENSMUSG00000021967	MRPL57	Mus musculus	mitochondrial ribosomal protein L57(Mrpl57)
ENSMUSG00000049670	MORN4	Mus musculus	MORN repeat containing 4(Morn4)
ENSMUSG00000028487	BNC2	Mus musculus	basonuclin 2(Bnc2)
ENSMUSG00000027357	CRLS1	Mus musculus	cardiolipin synthase 1(Crls1)
ENSMUSG00000031490	EIF4EBP1	Mus musculus	eukaryotic translation initiation factor 4E binding protein 1(Eif4ebp1)
ENSMUSG00000011751	SPTBN4	Mus musculus	spectrin beta, non-erythrocytic 4(Sptbn4)
ENSMUSG00000026972	ARRDC1	Mus musculus	arrestin domain containing 1(Arrdc1)
ENSMUSG00000059119	NAP1L4	Mus musculus	nucleosome assembly protein 1-like 4(Nap1l4)
ENSMUSG00000003233	DVL3	Mus musculus	dishevelled segment polarity protein 3(Dvl3)
ENSMUSG00000008604	UBQLN4	Mus musculus	ubiquilin 4(Ubqln4)
ENSMUSG00000029466	ANAPC7	Mus musculus	anaphase promoting complex subunit 7(Anapc7)
ENSMUSG00000020441	2310033P09Rik	Mus musculus	RIKEN cDNA 2310033P09 gene(2310033P09Rik)
ENSMUSG00000028479	GNE	Mus musculus	glucosamine (UDP-N-acetyl)-2-epimerase/N-acetylmannosamine kinase(Gne)
ENSMUSG00000026587	ASTN1	Mus musculus	astrotactin 1(Astn1)
ENSMUSG00000045205	DPY19L4	Mus musculus	dpy-19-like 4 (C. elegans)(Dpy19l4)
ENSMUSG00000057805	1700084M14Rik	Mus musculus	Gm5941 pseudogene(1700084M14Rik)
ENSMUSG00000073987	GGH	Mus musculus	gamma-glutamyl hydrolase(Ggh)
ENSMUSG00000029076	SDF4	Mus musculus	stromal cell derived factor 4(Sdf4)
ENSMUSG00000037325	BBS7	Mus musculus	Bardet-Biedl syndrome 7 (human)(Bbs7)
ENSMUSG00000046861	HECTD3	Mus musculus	HECT domain containing 3(Hectd3)
ENSMUSG00000046862	PRAMEF8	Mus musculus	PRAME family member 8(Pramef8)
ENSMUSG00000026584	SCYL3	Mus musculus	SCY1-like 3 (S. cerevisiae)(Scyl3)
ENSMUSG00000073982	RHOG	Mus musculus	ras homolog family member G(Rhog)
ENSMUSG00000019232	ETNPPL	Mus musculus	ethanolamine phosphate phospholyase(Etnppl)
ENSMUSG00000029050	SKI	Mus musculus	ski sarcoma viral oncogene homolog (avian)(Ski)
ENSMUSG00000020451	LIMK2	Mus musculus	LIM motif-containing protein kinase 2(Limk2)
ENSMUSG00000025903	LYPLA1	Mus musculus	lysophospholipase 1(Lypla1)
ENSMUSG00000019943	ATP2B1	Mus musculus	ATPase, Ca++ transporting, plasma membrane 1(Atp2b1)
ENSMUSG00000020453	PATZ1	Mus musculus	POZ (BTB) and AT hook containing zinc finger 1(Patz1)
ENSMUSG00000034021	PDS5B	Mus musculus	PDS5 cohesin associated factor B(Pds5b)
ENSMUSG00000019947	ARID5B	Mus musculus	AT rich interactive domain 5B (MRF1-like)(Arid5b)
ENSMUSG00000049659	AFTPH	Mus musculus	aftiphilin(Aftph)
ENSMUSG00000026249	SERPINE2	Mus musculus	serine (or cysteine) peptidase inhibitor, clade E, member 2(Serpine2)
ENSMUSG00000040618	PCK2	Mus musculus	phosphoenolpyruvate carboxykinase 2 (mitochondrial)(Pck2)
ENSMUSG00000026594	RALGPS2	Mus musculus	Ral GEF with PH domain and SH3 binding motif 2(Ralgps2)
ENSMUSG00000050063	KLK6	Mus musculus	kallikrein related-peptidase 6(Klk6)
ENSMUSG00000046873	YY2	Mus musculus	Yy2 transcription factor(Yy2)
ENSMUSG00000040610	TLX3	Mus musculus	T cell leukemia, homeobox 3(Tlx3)
ENSMUSG00000012405	RPL15	Mus musculus	ribosomal protein L15(Rpl15)
ENSMUSG00000029062	CDK11B	Mus musculus	cyclin-dependent kinase 11B(Cdk11b)
ENSMUSG00000021991	CACNA2D3	Mus musculus	calcium channel, voltage-dependent, alpha2/delta subunit 3(Cacna2d3)
ENSMUSG00000021993	mipep	Mus musculus	mitochondrial intermediate peptidase(Mipep)
ENSMUSG00000025915	SGK3	Mus musculus	serum/glucocorticoid regulated kinase 3(Sgk3)
ENSMUSG00000030303	FAR2	Mus musculus	fatty acyl CoA reductase 2(Far2)
ENSMUSG00000049643	2310022A10Rik	Mus musculus	RIKEN cDNA 2310022A10 gene(2310022A10Rik)
ENSMUSG00000030307	SLC6A11	Mus musculus	solute carrier family 6 (neurotransmitter transporter, GABA), member 11(Slc6a11)
ENSMUSG00000030306	TMTC1	Mus musculus	transmembrane and tetratricopeptide repeat containing 1(Tmtc1)
ENSMUSG00000029860	ZYX	Mus musculus	zyxin(Zyx)
ENSMUSG00000029055	PLCH2	Mus musculus	phospholipase C, eta 2(Plch2)
ENSMUSG00000024269	TPGS2	Mus musculus	tubulin polyglutamylase complex subunit 2(Tpgs2)
ENSMUSG00000010476	EBF3	Mus musculus	early B cell factor 3(Ebf3)
ENSMUSG00000033170	CARD10	Mus musculus	caspase recruitment domain family, member 10(Card10)
ENSMUSG00000025795	RASSF3	Mus musculus	Ras association (RalGDS/AF-6) domain family member 3(Rassf3)
ENSMUSG00000022125	CLN5	Mus musculus	ceroid-lipofuscinosis, neuronal 5(Cln5)
ENSMUSG00000028906	EPB41	Mus musculus	erythrocyte membrane protein band 4.1(Epb41)
ENSMUSG00000042724	MAP3K9	Mus musculus	mitogen-activated protein kinase kinase kinase 9(Map3k9)
ENSMUSG00000025790	SLCO3A1	Mus musculus	solute carrier organic anion transporter family, member 3a1(Slco3a1)
ENSMUSG00000046688	TIFA	Mus musculus	TRAF-interacting protein with forkhead-associated domain(Tifa)
ENSMUSG00000021518	PTDSS1	Mus musculus	phosphatidylserine synthase 1(Ptdss1)
ENSMUSG00000043439	E130012A19Rik	Mus musculus	RIKEN cDNA E130012A19 gene(E130012A19Rik)
ENSMUSG00000042308	SETD1A	Mus musculus	SET domain containing 1A(Setd1a)
ENSMUSG00000042305	TMEM183A	Mus musculus	transmembrane protein 183A(Tmem183a)
ENSMUSG00000053693	MAST1	Mus musculus	microtubule associated serine/threonine kinase 1(Mast1)
ENSMUSG00000027452	ACSS1	Mus musculus	acyl-CoA synthetase short-chain family member 1(Acss1)
ENSMUSG00000025786	ZDHHC3	Mus musculus	zinc finger, DHHC domain containing 3(Zdhhc3)
ENSMUSG00000033768	NRXN2	Mus musculus	neurexin II(Nrxn2)
ENSMUSG00000033767	D930015E06Rik	Mus musculus	RIKEN cDNA D930015E06 gene(D930015E06Rik)
ENSMUSG00000074030	EXOC8	Mus musculus	exocyst complex component 8(Exoc8)
ENSMUSG00000037904	ANKRD9	Mus musculus	ankyrin repeat domain 9(Ankrd9)
ENSMUSG00000032637	ATXN2L	Mus musculus	ataxin 2-like(Atxn2l)
ENSMUSG00000035299	MID1	Mus musculus	midline 1(Mid1)
ENSMUSG00000039959	HIP1	Mus musculus	huntingtin interacting protein 1(Hip1)
ENSMUSG00000022110	SUCLA2	Mus musculus	succinate-Coenzyme A ligase, ADP-forming, beta subunit(Sucla2)
ENSMUSG00000020700	MAP3K3	Mus musculus	mitogen-activated protein kinase kinase kinase 3(Map3k3)
ENSMUSG00000022969	IL10RB	Mus musculus	interleukin 10 receptor, beta(Il10rb)
ENSMUSG00000022965	IFNGR2	Mus musculus	interferon gamma receptor 2(Ifngr2)
ENSMUSG00000043429	CCDC185	Mus musculus	coiled-coil domain containing 185(Ccdc185)
ENSMUSG00000020705	DDX42	Mus musculus	DEAD (Asp-Glu-Ala-Asp) box polypeptide 42(Ddx42)
ENSMUSG00000038816	CTNNAL1	Mus musculus	catenin (cadherin associated protein), alpha-like 1(Ctnnal1)
ENSMUSG00000040811	EML2	Mus musculus	echinoderm microtubule associated protein like 2(Eml2)
ENSMUSG00000042708	SHCBP1L	Mus musculus	Shc SH2-domain binding protein 1-like(Shcbp1l)
ENSMUSG00000024247	PKDCC	Mus musculus	protein kinase domain containing, cytoplasmic(Pkdcc)
ENSMUSG00000006179	PRSS16	Mus musculus	protease, serine 16 (thymus)(Prss16)
ENSMUSG00000055707	KLHL26	Mus musculus	kelch-like 26(Klhl26)
ENSMUSG00000039483	ASB6	Mus musculus	ankyrin repeat and SOCS box-containing 6(Asb6)
ENSMUSG00000027439	GZF1	Mus musculus	GDNF-inducible zinc finger protein 1(Gzf1)
ENSMUSG00000055319	SEC23IP	Mus musculus	Sec23 interacting protein(Sec23ip)
ENSMUSG00000006586	RUNX1T1	Mus musculus	runt-related transcription factor 1; translocated to, 1 (cyclin D-related)(Runx1t1)
ENSMUSG00000033752	MND1	Mus musculus	meiotic nuclear divisions 1(Mnd1)
ENSMUSG00000042323	PBRM1	Mus musculus	polybromo 1(Pbrm1)
ENSMUSG00000054256	MSI1	Mus musculus	musashi RNA-binding protein 1(Msi1)
ENSMUSG00000038807	RAP1GAP2	Mus musculus	RAP1 GTPase activating protein 2(Rap1gap2)
ENSMUSG00000032615	NT5M	Mus musculus	5',3'-nucleotidase, mitochondrial(Nt5m)
ENSMUSG00000032612	USP4	Mus musculus	ubiquitin specific peptidase 4 (proto-oncogene)(Usp4)
ENSMUSG00000024235	MAP3K8	Mus musculus	mitogen-activated protein kinase kinase kinase 8(Map3k8)
ENSMUSG00000026499	ACBD3	Mus musculus	acyl-Coenzyme A binding domain containing 3(Acbd3)
ENSMUSG00000026496	PARP1	Mus musculus	poly (ADP-ribose) polymerase family, member 1(Parp1)
ENSMUSG00000025375	AATK	Mus musculus	apoptosis-associated tyrosine kinase(Aatk)
ENSMUSG00000039934	GSAP	Mus musculus	gamma-secretase activating protein(Gsap)
ENSMUSG00000022947	cbr3	Mus musculus	carbonyl reductase 3(Cbr3)
ENSMUSG00000092035	PEG10	Mus musculus	paternally expressed 10(Peg10)
ENSMUSG00000028101	PIAS3	Mus musculus	protein inhibitor of activated STAT 3(Pias3)
ENSMUSG00000006576	SLC4A3	Mus musculus	solute carrier family 4 (anion exchanger), member 3(Slc4a3)
ENSMUSG00000092060	BEND4	Mus musculus	BEN domain containing 4(Bend4)
ENSMUSG00000079330	lemd1	Mus musculus	LEM domain containing 1(Lemd1)
ENSMUSG00000063146	CLIP2	Mus musculus	CAP-GLY domain containing linker protein 2(Clip2)
ENSMUSG00000035248	ZCCHC6	Mus musculus	zinc finger, CCHC domain containing 6(Zcchc6)
ENSMUSG00000020023	TMCC3	Mus musculus	transmembrane and coiled coil domains 3(Tmcc3)
ENSMUSG00000028532	CACHD1	Mus musculus	cache domain containing 1(Cachd1)
ENSMUSG00000055725	PAQR3	Mus musculus	progestin and adipoQ receptor family member III(Paqr3)
ENSMUSG00000022160	mettl3	Mus musculus	methyltransferase like 3(Mettl3)
ENSMUSG00000038861	PI4KB	Mus musculus	phosphatidylinositol 4-kinase, catalytic, beta polypeptide(Pi4kb)
ENSMUSG00000040177	2310057M21Rik	Mus musculus	RIKEN cDNA 2310057M21 gene(2310057M21Rik)
ENSMUSG00000025340	RABGEF1	Mus musculus	RAB guanine nucleotide exchange factor (GEF) 1(Rabgef1)
ENSMUSG00000059291	RPL11	Mus musculus	ribosomal protein L11(Rpl11)
ENSMUSG00000055720	UBL7	Mus musculus	ubiquitin-like 7 (bone marrow stromal cell-derived)(Ubl7)
ENSMUSG00000038453	SRCIN1	Mus musculus	SRC kinase signaling inhibitor 1(Srcin1)
ENSMUSG00000025758	PLK4	Mus musculus	polo-like kinase 4(Plk4)
ENSMUSG00000048899	RIMKLA	Mus musculus	ribosomal modification protein rimK-like family member A(Rimkla)
ENSMUSG00000039901	9130011E15Rik	Mus musculus	RIKEN cDNA 9130011E15 gene(9130011E15Rik)
ENSMUSG00000028943	ESPN	Mus musculus	espin(Espn)
ENSMUSG00000019082	SLC25A22	Mus musculus	solute carrier family 25 (mitochondrial carrier, glutamate), member 22(Slc25a22)
ENSMUSG00000030870	UBFD1	Mus musculus	ubiquitin family domain containing 1(Ubfd1)
ENSMUSG00000005802	SLC30A4	Mus musculus	solute carrier family 30 (zinc transporter), member 4(Slc30a4)
ENSMUSG00000039914	COQ10A	Mus musculus	coenzyme Q10A(Coq10a)
ENSMUSG00000026927	SDCCAG3	Mus musculus	serologically defined colon cancer antigen 3(Sdccag3)
ENSMUSG00000000628	HK2	Mus musculus	hexokinase 2(Hk2)
ENSMUSG00000039917	rhbdd2	Mus musculus	rhomboid domain containing 2(Rhbdd2)
ENSMUSG00000040187	ARNTL2	Mus musculus	aryl hydrocarbon receptor nuclear translocator-like 2(Arntl2)
ENSMUSG00000054204	FAM150B	Mus musculus	family with sequence similarity 150, member B(Fam150b)
ENSMUSG00000053644	ALDH7A1	Mus musculus	aldehyde dehydrogenase family 7, member A1(Aldh7a1)
ENSMUSG00000018893	MB	Mus musculus	myoglobin(Mb)
ENSMUSG00000054200	FFAR4	Mus musculus	free fatty acid receptor 4(Ffar4)
ENSMUSG00000025747	TYMS	Mus musculus	thymidylate synthase(Tyms)
ENSMUSG00000028931	KCNAB2	Mus musculus	potassium voltage-gated channel, shaker-related subfamily, beta member 2(Kcnab2)
ENSMUSG00000027403	TGM6	Mus musculus	transglutaminase 6(Tgm6)
ENSMUSG00000025353	ORMDL2	Mus musculus	ORM1-like 2 (S. cerevisiae)(Ormdl2)
ENSMUSG00000026921	EGFL7	Mus musculus	EGF-like domain 7(Egfl7)
ENSMUSG00000025329	PADI1	Mus musculus	peptidyl arginine deiminase, type I(Padi1)
ENSMUSG00000033114	SLC35D2	Mus musculus	solute carrier family 35, member D2(Slc35d2)
ENSMUSG00000024283	WAC	Mus musculus	WW domain containing adaptor with coiled-coil(Wac)
ENSMUSG00000028926	CDK14	Mus musculus	cyclin-dependent kinase 14(Cdk14)
ENSMUSG00000040564	apoc1	Mus musculus	apolipoprotein C-I(Apoc1)
ENSMUSG00000025730	RAB40C	Mus musculus	Rab40C, member RAS oncogene family(Rab40c)
ENSMUSG00000038844	KIF16B	Mus musculus	kinesin family member 16B(Kif16b)
ENSMUSG00000089798	1700028K03Rik	Mus musculus	RIKEN cDNA 1700028K03 gene(1700028K03Rik)
ENSMUSG00000025732	FAM195A	Mus musculus	family with sequence similarity 195, member A(Fam195a)
ENSMUSG00000020288	AHSA2	Mus musculus	AHA1, activator of heat shock protein ATPase 2(Ahsa2)
ENSMUSG00000020289	NPRL3	Mus musculus	nitrogen permease regulator-like 3(Nprl3)
ENSMUSG00000033793	ATP6V1H	Mus musculus	ATPase, H+ transporting, lysosomal V1 subunit H(Atp6v1h)
ENSMUSG00000020284	1810043G02Rik	Mus musculus	RIKEN cDNA 1810043G02 gene(1810043G02Rik)
ENSMUSG00000033792	ATP7A	Mus musculus	ATPase, Cu++ transporting, alpha polypeptide(Atp7a)
ENSMUSG00000062031	PGGHG	Mus musculus	protein glucosylgalactosylhydroxylysine glucosidase(Pgghg)
ENSMUSG00000002733	PLEKHA3	Mus musculus	pleckstrin homology domain-containing, family A (phosphoinositide binding specific) member 3(Plekha3)
ENSMUSG00000006542	PRKAG3	Mus musculus	protein kinase, AMP-activated, gamma 3 non-catatlytic subunit(Prkag3)
ENSMUSG00000079343	C1s2	Mus musculus	complement component 1, s subcomponent 2(C1s2)
ENSMUSG00000028914	CASP9	Mus musculus	caspase 9(Casp9)
ENSMUSG00000028527	AK4	Mus musculus	adenylate kinase 4(Ak4)
ENSMUSG00000039457	PPL	Mus musculus	periplakin(Ppl)
ENSMUSG00000024277	MAPRE2	Mus musculus	microtubule-associated protein, RP/EB family, member 2(Mapre2)
ENSMUSG00000035273	HPSE	Mus musculus	heparanase(Hpse)
ENSMUSG00000028525	PDE4B	Mus musculus	phosphodiesterase 4B, cAMP specific(Pde4b)
ENSMUSG00000039456	MORC3	Mus musculus	microrchidia 3(Morc3)
ENSMUSG00000028521	SLC35D1	Mus musculus	solute carrier family 35 (UDP-glucuronic acid/UDP-N-acetylgalactosamine dual transporter), member D1(Slc35d1)
ENSMUSG00000028522	MIER1	Mus musculus	MEIR1 treanscription regulator(Mier1)
ENSMUSG00000020277	PFKL	Mus musculus	phosphofructokinase, liver, B-type(Pfkl)
ENSMUSG00000022905	KPNA1	Mus musculus	karyopherin (importin) alpha 1(Kpna1)
ENSMUSG00000039043	ARPIN	Mus musculus	actin-related protein 2/3 complex inhibitor(Arpin)
ENSMUSG00000025728	PIGQ	Mus musculus	phosphatidylinositol glycan anchor biosynthesis, class Q(Pigq)
ENSMUSG00000033781	ASB13	Mus musculus	ankyrin repeat and SOCS box-containing 13(Asb13)
ENSMUSG00000019054	FIS1	Mus musculus	fission, mitochondrial 1(Fis1)
ENSMUSG00000052102	GNPDA1	Mus musculus	glucosamine-6-phosphate deaminase 1(Gnpda1)
ENSMUSG00000028910	MECR	Mus musculus	mitochondrial trans-2-enoyl-CoA reductase(Mecr)
ENSMUSG00000079349	Magea5	Mus musculus	melanoma antigen, family A, 5(Magea5)
ENSMUSG00000035206	SPPL2B	Mus musculus	signal peptide peptidase like 2B(Sppl2b)
ENSMUSG00000031979	COG2	Mus musculus	component of oligomeric golgi complex 2(Cog2)
ENSMUSG00000041671	PYROXD1	Mus musculus	pyridine nucleotide-disulphide oxidoreductase domain 1(Pyroxd1)
ENSMUSG00000006906	STAMBP	Mus musculus	STAM binding protein(Stambp)
ENSMUSG00000036768	KIF15	Mus musculus	kinesin family member 15(Kif15)
ENSMUSG00000031974	abcb10	Mus musculus	ATP-binding cassette, sub-family B (MDR/TAP), member 10(Abcb10)
ENSMUSG00000028152	TSPAN5	Mus musculus	tetraspanin 5(Tspan5)
ENSMUSG00000052563	D930048N14Rik	Mus musculus	RIKEN cDNA D930048N14 gene(D930048N14Rik)
ENSMUSG00000041268	DMXL2	Mus musculus	Dmx-like 2(Dmxl2)
ENSMUSG00000028150	rorc	Mus musculus	RAR-related orphan receptor gamma(Rorc)
ENSMUSG00000068876	CGN	Mus musculus	cingulin(Cgn)
ENSMUSG00000028980	H6PD	Mus musculus	hexose-6-phosphate dehydrogenase (glucose 1-dehydrogenase)(H6pd)
ENSMUSG00000001700	GRAMD3	Mus musculus	GRAM domain containing 3(Gramd3)
ENSMUSG00000031068	GLRX3	Mus musculus	glutaredoxin 3(Glrx3)
ENSMUSG00000005069	PEX5	Mus musculus	peroxisomal biogenesis factor 5(Pex5)
ENSMUSG00000032046	ABHD12	Mus musculus	abhydrolase domain containing 12(Abhd12)
ENSMUSG00000021595	NSUN2	Mus musculus	NOL1/NOP2/Sun domain family member 2(Nsun2)
ENSMUSG00000034620	TMEM5	Mus musculus	transmembrane protein 5(Tmem5)
ENSMUSG00000053219	RAET1E	Mus musculus	retinoic acid early transcript 1E(Raet1e)
ENSMUSG00000021589	RHOBTB3	Mus musculus	Rho-related BTB domain containing 3(Rhobtb3)
ENSMUSG00000060733	IPMK	Mus musculus	inositol polyphosphate multikinase(Ipmk)
ENSMUSG00000031969	ACAD8	Mus musculus	acyl-Coenzyme A dehydrogenase family, member 8(Acad8)
ENSMUSG00000005078	JKAMP	Mus musculus	JNK1/MAPK8-associated membrane protein(Jkamp)
ENSMUSG00000042377	FAM83G	Mus musculus	family with sequence similarity 83, member G(Fam83g)
ENSMUSG00000022195	6030458C11Rik	Mus musculus	RIKEN cDNA 6030458C11 gene(6030458C11Rik)
ENSMUSG00000016206	H2-M3	Mus musculus	histocompatibility 2, M region locus 3(H2-M3)
ENSMUSG00000031077	FADD	Mus musculus	Fas (TNFRSF6)-associated via death domain(Fadd)
ENSMUSG00000031075	ANO1	Mus musculus	anoctamin 1, calcium activated chloride channel(Ano1)
ENSMUSG00000031994	ADAMTS8	Mus musculus	a disintegrin-like and metallopeptidase (reprolysin type) with thrombospondin type 1 motif, 8(Adamts8)
ENSMUSG00000031995	ST14	Mus musculus	suppression of tumorigenicity 14 (colon carcinoma)(St14)
ENSMUSG00000034607	POF1B	Mus musculus	premature ovarian failure 1B(Pof1b)
ENSMUSG00000031996	APLP2	Mus musculus	amyloid beta (A4) precursor-like protein 2(Aplp2)
ENSMUSG00000052135	FOXO6	Mus musculus	forkhead box O6(Foxo6)
ENSMUSG00000010025	ALDH3A2	Mus musculus	aldehyde dehydrogenase family 3, subfamily A2(Aldh3a2)
ENSMUSG00000057406	whsc1	Mus musculus	Wolf-Hirschhorn syndrome candidate 1 (human)(Whsc1)
ENSMUSG00000040118	CACNA2D1	Mus musculus	calcium channel, voltage-dependent, alpha2/delta subunit 1(Cacna2d1)
ENSMUSG00000071533	PCNP	Mus musculus	PEST proteolytic signal containing nuclear protein(Pcnp)
ENSMUSG00000022577	LY6H	Mus musculus	lymphocyte antigen 6 complex, locus H(Ly6h)
ENSMUSG00000041241	MUL1	Mus musculus	mitochondrial ubiquitin ligase activator of NFKB 1(Mul1)
ENSMUSG00000022579	GPIHBP1	Mus musculus	GPI-anchored HDL-binding protein 1(Gpihbp1)
ENSMUSG00000038884	A230050P20Rik	Mus musculus	RIKEN cDNA A230050P20 gene(A230050P20Rik)
ENSMUSG00000005043	SGSH	Mus musculus	N-sulfoglucosamine sulfohydrolase (sulfamidase)(Sgsh)
ENSMUSG00000032023	Jhy	Mus musculus	juvenile hydrocephalus(Jhy)
ENSMUSG00000032026	REXO2	Mus musculus	RNA exonuclease 2(Rexo2)
ENSMUSG00000031984	2810004N23Rik	Mus musculus	RIKEN cDNA 2810004N23 gene(2810004N23Rik)
ENSMUSG00000032018	SC5D	Mus musculus	sterol-C5-desaturase(Sc5d)
ENSMUSG00000005442	CIC	Mus musculus	capicua transcriptional repressor(Cic)
ENSMUSG00000022580	RHPN1	Mus musculus	rhophilin, Rho GTPase binding protein 1(Rhpn1)
ENSMUSG00000002012	PNCK	Mus musculus	pregnancy upregulated non-ubiquitously expressed CaM kinase(Pnck)
ENSMUSG00000040875	OSBPL10	Mus musculus	oxysterol binding protein-like 10(Osbpl10)
ENSMUSG00000017781	pitpna	Mus musculus	phosphatidylinositol transfer protein, alpha(Pitpna)
ENSMUSG00000039000	UBE3C	Mus musculus	ubiquitin protein ligase E3C(Ube3c)
ENSMUSG00000041258	Zfp236	Mus musculus	zinc finger protein 236(Zfp236)
ENSMUSG00000040124	GORAB	Mus musculus	golgin, RAB6-interacting(Gorab)
ENSMUSG00000005447	PAFAH1B3	Mus musculus	platelet-activating factor acetylhydrolase, isoform 1b, subunit 3(Pafah1b3)
ENSMUSG00000028191	BCL10	Mus musculus	B cell leukemia/lymphoma 10(Bcl10)
ENSMUSG00000090231	CFB	Mus musculus	complement factor B(Cfb)
ENSMUSG00000052534	PBX1	Mus musculus	pre B cell leukemia homeobox 1(Pbx1)
ENSMUSG00000035735	DAGLA	Mus musculus	diacylglycerol lipase, alpha(Dagla)
ENSMUSG00000032698	LMO2	Mus musculus	LIM domain only 2(Lmo2)
ENSMUSG00000052539	MAGI3	Mus musculus	membrane associated guanylate kinase, WW and PDZ domain containing 3(Magi3)
ENSMUSG00000078252	KRTAP17-1	Mus musculus	keratin associated protein 17-1(Krtap17-1)
ENSMUSG00000032010	USP2	Mus musculus	ubiquitin specific peptidase 2(Usp2)
ENSMUSG00000074513	arfip1	Mus musculus	ADP-ribosylation factor interacting protein 1(Arfip1)
ENSMUSG00000007613	TGFBR1	Mus musculus	transforming growth factor, beta receptor I(Tgfbr1)
ENSMUSG00000004264	PHB2	Mus musculus	prohibitin 2(Phb2)
ENSMUSG00000040867	BEGAIN	Mus musculus	brain-enriched guanylate kinase-associated(Begain)
ENSMUSG00000039985	FAM60A	Mus musculus	family with sequence similarity 60, member A(Fam60a)
ENSMUSG00000022992	KANSL2	Mus musculus	KAT8 regulatory NSL complex subunit 2(Kansl2)
ENSMUSG00000021550	2210016F16Rik	Mus musculus	RIKEN cDNA 2210016F16 gene(2210016F16Rik)
ENSMUSG00000043811	RTN4R	Mus musculus	reticulon 4 receptor(Rtn4r)
ENSMUSG00000034663	BMP2K	Mus musculus	BMP2 inducible kinase(Bmp2k)
ENSMUSG00000042340	CTF1	Mus musculus	cardiotrophin 1(Ctf1)
ENSMUSG00000090291	LRRC10B	Mus musculus	leucine rich repeat containing 10B(Lrrc10b)
ENSMUSG00000040855	REPS2	Mus musculus	RALBP1 associated Eps domain containing protein 2(Reps2)
ENSMUSG00000021546	HNRNPK	Mus musculus	heterogeneous nuclear ribonucleoprotein K(Hnrnpk)
ENSMUSG00000001750	TCIRG1	Mus musculus	T cell, immune regulator 1, ATPase, H+ transporting, lysosomal V0 protein A3(Tcirg1)
ENSMUSG00000021549	RASA1	Mus musculus	RAS p21 protein activator 1(Rasa1)
ENSMUSG00000032076	CADM1	Mus musculus	cell adhesion molecule 1(Cadm1)
ENSMUSG00000047767	atg16l2	Mus musculus	autophagy related 16-like 2 (S. cerevisiae)(Atg16l2)
ENSMUSG00000033722	BC034090	Mus musculus	cDNA sequence BC034090(BC034090)
ENSMUSG00000005881	ERGIC3	Mus musculus	ERGIC and golgi 3(Ergic3)
ENSMUSG00000070509	RGMA	Mus musculus	repulsive guidance molecule family member A(Rgma)
ENSMUSG00000050272	DSCAM	Mus musculus	Down syndrome cell adhesion molecule(Dscam)
ENSMUSG00000042369	RBM45	Mus musculus	RNA binding motif protein 45(Rbm45)
ENSMUSG00000050271	D8Ertd82e	Mus musculus	DNA segment, Chr 8, ERATO Doi 82, expressed(D8Ertd82e)
ENSMUSG00000043419	Chd3os	Mus musculus	chromodomain helicase DNA binding protein 3, opposite strand(Chd3os)
ENSMUSG00000010064	SLC38A3	Mus musculus	solute carrier family 38, member 3(Slc38a3)
ENSMUSG00000015575	Atp6v0e	Mus musculus	ATPase, H+ transporting, lysosomal V0 subunit E(Atp6v0e)
ENSMUSG00000003863	PPFIA3	Mus musculus	protein tyrosine phosphatase, receptor type, f polypeptide (PTPRF), interacting protein (liprin), alpha 3(Ppfia3)
ENSMUSG00000043004	GNG2	Mus musculus	guanine nucleotide binding protein (G protein), gamma 2(Gng2)
ENSMUSG00000034645	ZYG11A	Mus musculus	zyg-11 family member A, cell cycle regulator(Zyg11a)
ENSMUSG00000022971	IFNAR2	Mus musculus	interferon (alpha and beta) receptor 2(Ifnar2)
ENSMUSG00000032652	CREBL2	Mus musculus	cAMP responsive element binding protein-like 2(Crebl2)
ENSMUSG00000089704	GALNT2	Mus musculus	UDP-N-acetyl-alpha-D-galactosamine:polypeptide N-acetylgalactosaminyltransferase 2(Galnt2)
ENSMUSG00000078794	DACT3	Mus musculus	dishevelled-binding antagonist of beta-catenin 3(Dact3)
ENSMUSG00000022987	Zfp641	Mus musculus	zinc finger protein 641(Zfp641)
ENSMUSG00000003873	BAX	Mus musculus	BCL2-associated X protein(Bax)
ENSMUSG00000024731	MS4A10	Mus musculus	membrane-spanning 4-domains, subfamily A, member 10(Ms4a10)
ENSMUSG00000034636	ZYG11B	Mus musculus	zyg-ll family member B, cell cycle regulator(Zyg11b)
ENSMUSG00000032058	PPP2R1B	Mus musculus	protein phosphatase 2, regulatory subunit A, beta(Ppp2r1b)
ENSMUSG00000033186	MZT1	Mus musculus	mitotic spindle organizing protein 1(Mzt1)
ENSMUSG00000033705	STARD9	Mus musculus	START domain containing 9(Stard9)
ENSMUSG00000029381	SHROOM3	Mus musculus	shroom family member 3(Shroom3)
ENSMUSG00000034570	INPP5J	Mus musculus	inositol polyphosphate 5-phosphatase J(Inpp5j)
ENSMUSG00000031503	COL4A2	Mus musculus	collagen, type IV, alpha 2(Col4a2)
ENSMUSG00000043843	TMEM145	Mus musculus	transmembrane protein 145(Tmem145)
ENSMUSG00000047843	bri3	Mus musculus	brain protein I3(Bri3)
ENSMUSG00000034575	PAPD7	Mus musculus	PAP associated domain containing 7(Papd7)
ENSMUSG00000087260	LAMTOR5	Mus musculus	late endosomal/lysosomal adaptor, MAPK and MTOR activator 5(Lamtor5)
ENSMUSG00000001672	MARVELD3	Mus musculus	MARVEL (membrane-associating) domain containing 3(Marveld3)
ENSMUSG00000029376	MTHFD2L	Mus musculus	methylenetetrahydrofolate dehydrogenase (NADP+ dependent) 2-like(Mthfd2l)
ENSMUSG00000031511	ARHGEF7	Mus musculus	Rho guanine nucleotide exchange factor (GEF7)(Arhgef7)
ENSMUSG00000057948	UNC13D	Mus musculus	unc-13 homolog D (C. elegans)(Unc13d)
ENSMUSG00000029370	RASSF6	Mus musculus	Ras association (RalGDS/AF-6) domain family member 6(Rassf6)
ENSMUSG00000017314	MPP2	Mus musculus	membrane protein, palmitoylated 2 (MAGUK p55 subfamily member 2)(Mpp2)
ENSMUSG00000074971	FIBIN	Mus musculus	fin bud initiation factor homolog (zebrafish)(Fibin)
ENSMUSG00000062929	CFL2	Mus musculus	cofilin 2, muscle(Cfl2)
ENSMUSG00000054659	PM20D2	Mus musculus	peptidase M20 domain containing 2(Pm20d2)
ENSMUSG00000029364	WSB2	Mus musculus	WD repeat and SOCS box-containing 2(Wsb2)
ENSMUSG00000048439	NUPL2	Mus musculus	nucleoporin like 2(Nupl2)
ENSMUSG00000007655	CAV1	Mus musculus	caveolin 1, caveolae protein(Cav1)
ENSMUSG00000023235	CCL25	Mus musculus	chemokine (C-C motif) ligand 25(Ccl25)
ENSMUSG00000059714	FLOT1	Mus musculus	flotillin 1(Flot1)
ENSMUSG00000000149	GNA12	Mus musculus	guanine nucleotide binding protein, alpha 12(Gna12)
ENSMUSG00000074582	ARFGEF2	Mus musculus	ADP-ribosylation factor guanine nucleotide-exchange factor 2 (brefeldin A-inhibited)(Arfgef2)
ENSMUSG00000001248	GRAMD1A	Mus musculus	GRAM domain containing 1A(Gramd1a)
ENSMUSG00000071847	APCDD1	Mus musculus	adenomatosis polyposis coli down-regulated 1(Apcdd1)
ENSMUSG00000013833	MED16	Mus musculus	mediator complex subunit 16(Med16)
ENSMUSG00000034552	ZSWIM2	Mus musculus	zinc finger SWIM-type containing 2(Zswim2)
ENSMUSG00000037410	TBC1D2B	Mus musculus	TBC1 domain family, member 2B(Tbc1d2b)
ENSMUSG00000031902	NFATC3	Mus musculus	nuclear factor of activated T cells, cytoplasmic, calcineurin dependent 3(Nfatc3)
ENSMUSG00000034557	ZFYVE9	Mus musculus	zinc finger, FYVE domain containing 9(Zfyve9)
ENSMUSG00000096215	SMIM22	Mus musculus	small integral membrane protein 22(Smim22)
ENSMUSG00000034161	SCX	Mus musculus	scleraxis(Scx)
ENSMUSG00000044005	GLS2	Mus musculus	glutaminase 2 (liver, mitochondrial)(Gls2)
ENSMUSG00000034165	CCND3	Mus musculus	cyclin D3(Ccnd3)
ENSMUSG00000031904	SLC7A6	Mus musculus	solute carrier family 7 (cationic amino acid transporter, y+ system), member 6(Slc7a6)
ENSMUSG00000016256	CTSZ	Mus musculus	cathepsin Z(Ctsz)
ENSMUSG00000014329	BICC1	Mus musculus	BicC family RNA binding protein 1(Bicc1)
ENSMUSG00000013822	ELOF1	Mus musculus	ELF1 homolog, elongation factor 1(Elof1)
ENSMUSG00000034563	CCPG1	Mus musculus	cell cycle progression 1(Ccpg1)
ENSMUSG00000043831	LYSMD4	Mus musculus	LysM, putative peptidoglycan-binding, domain containing 4(Lysmd4)
ENSMUSG00000078302	FOXD1	Mus musculus	forkhead box D1(Foxd1)
ENSMUSG00000022619	MAPK8IP2	Mus musculus	mitogen-activated protein kinase 8 interacting protein 2(Mapk8ip2)
ENSMUSG00000024665	FADS2	Mus musculus	fatty acid desaturase 2(Fads2)
ENSMUSG00000024666	TMEM138	Mus musculus	transmembrane protein 138(Tmem138)
ENSMUSG00000031910	HAS3	Mus musculus	hyaluronan synthase 3(Has3)
ENSMUSG00000096225	LHX8	Mus musculus	LIM homeobox protein 8(Lhx8)
ENSMUSG00000021890	EAF1	Mus musculus	ELL associated factor 1(Eaf1)
ENSMUSG00000023259	slc26a6	Mus musculus	solute carrier family 26, member 6(Slc26a6)
ENSMUSG00000021895	ARHGEF3	Mus musculus	Rho guanine nucleotide exchange factor (GEF) 3(Arhgef3)
ENSMUSG00000029389	DDX55	Mus musculus	DEAD (Asp-Glu-Ala-Asp) box polypeptide 55(Ddx55)
ENSMUSG00000029388	EIF2B1	Mus musculus	eukaryotic translation initiation factor 2B, subunit 1 (alpha)(Eif2b1)
ENSMUSG00000032112	TRAPPC4	Mus musculus	trafficking protein particle complex 4(Trappc4)
ENSMUSG00000043885	SLC36A4	Mus musculus	solute carrier family 36 (proton/amino acid symporter), member 4(Slc36a4)
ENSMUSG00000048483	zdhhc22	Mus musculus	zinc finger, DHHC-type containing 22(Zdhhc22)
ENSMUSG00000042292	MKL1	Mus musculus	MKL (megakaryoblastic leukemia)/myocardin-like 1(Mkl1)
ENSMUSG00000031543	ANK1	Mus musculus	ankyrin 1, erythroid(Ank1)
ENSMUSG00000052512	NAV2	Mus musculus	neuron navigator 2(Nav2)
ENSMUSG00000068391	CHRAC1	Mus musculus	chromatin accessibility complex 1(Chrac1)
ENSMUSG00000105096	Gbp10	Mus musculus	guanylate-binding protein 10(Gbp10)
ENSMUSG00000022680	PDXDC1	Mus musculus	pyridoxal-dependent decarboxylase domain containing 1(Pdxdc1)
ENSMUSG00000090744	LOC102642386	Mus musculus	zinc finger protein 431-like(LOC102642386)
ENSMUSG00000070820	Olfr1339	Mus musculus	olfactory receptor 1339(Olfr1339)
ENSMUSG00000031927	1700012B09Rik	Mus musculus	RIKEN cDNA 1700012B09 gene(1700012B09Rik)
ENSMUSG00000017760	CTSA	Mus musculus	cathepsin A(Ctsa)
ENSMUSG00000035673	SBNO2	Mus musculus	strawberry notch homolog 2 (Drosophila)(Sbno2)
ENSMUSG00000017765	SLC12A4	Mus musculus	solute carrier family 12, member 4(Slc12a4)
ENSMUSG00000036835	PSENEN	Mus musculus	presenilin enhancer gamma secretase subunit(Psenen)
ENSMUSG00000031158	TIMM17B	Mus musculus	translocase of inner mitochondrial membrane 17b(Timm17b)
ENSMUSG00000058624	GDA	Mus musculus	guanine deaminase(Gda)
ENSMUSG00000032115	HYOU1	Mus musculus	hypoxia up-regulated 1(Hyou1)
ENSMUSG00000032123	DPAGT1	Mus musculus	dolichyl-phosphate (UDP-N-acetylglucosamine) acetylglucosaminephosphotransferase 1 (GlcNAc-1-P transferase)(Dpagt1)
ENSMUSG00000031556	TM2D2	Mus musculus	TM2 domain containing 2(Tm2d2)
ENSMUSG00000048478	SPATA33	Mus musculus	spermatogenesis associated 33(Spata33)
ENSMUSG00000031554	ADAM5	Mus musculus	a disintegrin and metallopeptidase domain 5(Adam5)
ENSMUSG00000031555	ADAM9	Mus musculus	a disintegrin and metallopeptidase domain 9 (meltrin gamma)(Adam9)
ENSMUSG00000027007	SSFA2	Mus musculus	sperm specific antigen 2(Ssfa2)
ENSMUSG00000026401	Cd55b	Mus musculus	CD55 molecule, decay accelerating factor for complement B(Cd55b)
ENSMUSG00000050212	EVA1B	Mus musculus	eva-1 homolog B (C. elegans)(Eva1b)
ENSMUSG00000031939	TAF1D	Mus musculus	TATA-box binding protein associated factor, RNA polymerase I, D(Taf1d)
ENSMUSG00000068798	RAP1A	Mus musculus	RAS-related protein-1a(Rap1a)
ENSMUSG00000050627	GPD1L	Mus musculus	glycerol-3-phosphate dehydrogenase 1-like(Gpd1l)
ENSMUSG00000002083	BBC3	Mus musculus	BCL2 binding component 3(Bbc3)
ENSMUSG00000017774	MYO1C	Mus musculus	myosin IC(Myo1c)
ENSMUSG00000017776	CRK	Mus musculus	v-crk avian sarcoma virus CT10 oncogene homolog(Crk)
ENSMUSG00000071185	Olfr1357	Mus musculus	olfactory receptor 1357(Olfr1357)
ENSMUSG00000043895	S1PR2	Mus musculus	sphingosine-1-phosphate receptor 2(S1pr2)
ENSMUSG00000001280	SP1	Mus musculus	trans-acting transcription factor 1(Sp1)
ENSMUSG00000034595	PPP1R18	Mus musculus	protein phosphatase 1, regulatory subunit 18(Ppp1r18)
ENSMUSG00000021483	CDK20	Mus musculus	cyclin-dependent kinase 20(Cdk20)
ENSMUSG00000027981	RNPC3	Mus musculus	RNA-binding region (RNP1, RRM) containing 3(Rnpc3)
ENSMUSG00000071177	Serpina1d	Mus musculus	serine (or cysteine) peptidase inhibitor, clade A, member 1D(Serpina1d)
ENSMUSG00000057337	CHST3	Mus musculus	carbohydrate (chondroitin 6/keratan) sulfotransferase 3(Chst3)
ENSMUSG00000071178	Serpina1b	Mus musculus	serine (or cysteine) preptidase inhibitor, clade A, member 1B(Serpina1b)
ENSMUSG00000014791	ELMO3	Mus musculus	engulfment and cell motility 3(Elmo3)
ENSMUSG00000027983	cyp2u1	Mus musculus	cytochrome P450, family 2, subfamily u, polypeptide 1(Cyp2u1)
ENSMUSG00000041607	MBP	Mus musculus	myelin basic protein(Mbp)
ENSMUSG00000031521	AGA	Mus musculus	aspartylglucosaminidase(Aga)
ENSMUSG00000041609	CCDC64	Mus musculus	coiled-coil domain containing 64(Ccdc64)
ENSMUSG00000031520	VEGFC	Mus musculus	vascular endothelial growth factor C(Vegfc)
ENSMUSG00000021098	4930447C04Rik	Mus musculus	RIKEN cDNA 4930447C04 gene(4930447C04Rik)
ENSMUSG00000015846	RXRA	Mus musculus	retinoid X receptor alpha(Rxra)
ENSMUSG00000045176	BORCS6	Mus musculus	BLOC-1 related complex subunit 6(Borcs6)
ENSMUSG00000036814	Slc6a20a	Mus musculus	solute carrier family 6 (neurotransmitter transporter), member 20A(Slc6a20a)
ENSMUSG00000036822	TOPORS	Mus musculus	topoisomerase I binding, arginine/serine-rich(Topors)
ENSMUSG00000057322	RPL38	Mus musculus	ribosomal protein L38(Rpl38)
ENSMUSG00000021493	PDLIM7	Mus musculus	PDZ and LIM domain 7(Pdlim7)
ENSMUSG00000032101	DDX25	Mus musculus	DEAD (Asp-Glu-Ala-Asp) box polypeptide 25(Ddx25)
ENSMUSG00000003585	SEC14L2	Mus musculus	SEC14-like lipid binding 2(Sec14l2)
ENSMUSG00000022656	NECTIN3	Mus musculus	nectin cell adhesion molecule 3(Nectin3)
ENSMUSG00000021087	RTN1	Mus musculus	reticulon 1(Rtn1)
ENSMUSG00000005417	MPRIP	Mus musculus	myosin phosphatase Rho interacting protein(Mprip)
ENSMUSG00000044037	ALS2CL	Mus musculus	ALS2 C-terminal like(Als2cl)
ENSMUSG00000062157	IFNLR1	Mus musculus	interferon lambda receptor 1(Ifnlr1)
ENSMUSG00000050608	MINOS1	Mus musculus	mitochondrial inner membrane organizing system 1(Minos1)
ENSMUSG00000061898	RBAK	Mus musculus	RB-associated KRAB zinc finger(Rbak)
ENSMUSG00000070047	FAT1	Mus musculus	FAT atypical cadherin 1(Fat1)
ENSMUSG00000017756	SLC12A7	Mus musculus	solute carrier family 12, member 7(Slc12a7)
ENSMUSG00000031955	BCAR1	Mus musculus	breast cancer anti-estrogen resistance 1(Bcar1)
ENSMUSG00000031129	SLC9A9	Mus musculus	solute carrier family 9 (sodium/hydrogen exchanger), member 9(Slc9a9)
ENSMUSG00000042790	RNF214	Mus musculus	ring finger protein 214(Rnf214)
ENSMUSG00000030069	prok2	Mus musculus	prokineticin 2(Prok2)
ENSMUSG00000026842	abl1	Mus musculus	c-abl oncogene 1, non-receptor tyrosine kinase(Abl1)
ENSMUSG00000021071	TRIM9	Mus musculus	tripartite motif-containing 9(Trim9)
ENSMUSG00000026843	FUBP3	Mus musculus	far upstream element (FUSE) binding protein 3(Fubp3)
ENSMUSG00000046714	FOXC2	Mus musculus	forkhead box C2(Foxc2)
ENSMUSG00000020785	CAMKK1	Mus musculus	calcium/calmodulin-dependent protein kinase kinase 1, alpha(Camkk1)
ENSMUSG00000017390	ALDOC	Mus musculus	aldolase C, fructose-bisphosphate(Aldoc)
ENSMUSG00000020788	ATP2A3	Mus musculus	ATPase, Ca++ transporting, ubiquitous(Atp2a3)
ENSMUSG00000020374	RASGEF1C	Mus musculus	RasGEF domain family, member 1C(Rasgef1c)
ENSMUSG00000020377	LTC4S	Mus musculus	leukotriene C4 synthase(Ltc4s)
ENSMUSG00000020376	RNF130	Mus musculus	ring finger protein 130(Rnf130)
ENSMUSG00000029718	PCOLCE	Mus musculus	procollagen C-endopeptidase enhancer protein(Pcolce)
ENSMUSG00000031585	GTF2E2	Mus musculus	general transcription factor II E, polypeptide 2 (beta subunit)(Gtf2e2)
ENSMUSG00000030451	HERC2	Mus musculus	HECT and RLD domain containing E3 ubiquitin protein ligase 2(Herc2)
ENSMUSG00000062995	ICA1	Mus musculus	islet cell autoantigen 1(Ica1)
ENSMUSG00000031583	WRN	Mus musculus	Werner syndrome homolog (human)(Wrn)
ENSMUSG00000006519	CYBA	Mus musculus	cytochrome b-245, alpha polypeptide(Cyba)
ENSMUSG00000029713	GNB2	Mus musculus	guanine nucleotide binding protein (G protein), beta 2(Gnb2)
ENSMUSG00000026322	HTR4	Mus musculus	5 hydroxytryptamine (serotonin) receptor 4(Htr4)
ENSMUSG00000021824	AP3M1	Mus musculus	adaptor-related protein complex 3, mu 1 subunit(Ap3m1)
ENSMUSG00000029710	EPHB4	Mus musculus	Eph receptor B4(Ephb4)
ENSMUSG00000034931	DHX8	Mus musculus	DEAH (Asp-Glu-Ala-His) box polypeptide 8(Dhx8)
ENSMUSG00000026430	RASSF5	Mus musculus	Ras association (RalGDS/AF-6) domain family member 5(Rassf5)
ENSMUSG00000028580	PUM1	Mus musculus	pumilio RNA-binding family member 1(Pum1)
ENSMUSG00000028582	CC2D1B	Mus musculus	coiled-coil and C2 domain containing 1B(Cc2d1b)
ENSMUSG00000039431	MTMR7	Mus musculus	myotubularin related protein 7(Mtmr7)
ENSMUSG00000044092	C130050O18Rik	Mus musculus	RIKEN cDNA C130050O18 gene(C130050O18Rik)
ENSMUSG00000030059	TMF1	Mus musculus	TATA element modulatory factor 1(Tmf1)
ENSMUSG00000079418	ATG4A	Mus musculus	autophagy related 4A, cysteine peptidase(Atg4a)
ENSMUSG00000061878	SPHK1	Mus musculus	sphingosine kinase 1(Sphk1)
ENSMUSG00000021068	NIN	Mus musculus	ninein(Nin)
ENSMUSG00000056413	ADAP1	Mus musculus	ArfGAP with dual PH domains 1(Adap1)
ENSMUSG00000038236	HOXA7	Mus musculus	homeobox A7(Hoxa7)
ENSMUSG00000038235	F11R	Mus musculus	F11 receptor(F11r)
ENSMUSG00000030463	4933421I07Rik	Mus musculus	RIKEN cDNA 4933421I07 gene(4933421I07Rik)
ENSMUSG00000062175	TGIF2	Mus musculus	TGFB-induced factor homeobox 2(Tgif2)
ENSMUSG00000009630	PPP2CB	Mus musculus	protein phosphatase 2 (formerly 2A), catalytic subunit, beta isoform(Ppp2cb)
ENSMUSG00000029703	LRWD1	Mus musculus	leucine-rich repeats and WD repeat domain containing 1(Lrwd1)
ENSMUSG00000037463	FBXO27	Mus musculus	F-box protein 27(Fbxo27)
ENSMUSG00000027973	1700006A11Rik	Mus musculus	RIKEN cDNA 1700006A11 gene(1700006A11Rik)
ENSMUSG00000026317	CLN8	Mus musculus	ceroid-lipofuscinosis, neuronal 8(Cln8)
ENSMUSG00000037461	INTS7	Mus musculus	integrator complex subunit 7(Ints7)
ENSMUSG00000020389	CDKL3	Mus musculus	cyclin-dependent kinase-like 3(Cdkl3)
ENSMUSG00000053617	SH3PXD2A	Mus musculus	SH3 and PX domains 2A(Sh3pxd2a)
ENSMUSG00000028572	HOOK1	Mus musculus	hook microtubule tethering protein 1(Hook1)
ENSMUSG00000040543	PITPNM3	Mus musculus	PITPNM family member 3(Pitpnm3)
ENSMUSG00000029314	AGPAT9	Mus musculus	1-acylglycerol-3-phosphate O-acyltransferase 9(Agpat9)
ENSMUSG00000025809	ITGB1	Mus musculus	integrin beta 1 (fibronectin receptor beta)(Itgb1)
ENSMUSG00000030431	TMEM238	Mus musculus	transmembrane protein 238(Tmem238)
ENSMUSG00000026309	ILKAP	Mus musculus	integrin-linked kinase-associated serine/threonine phosphatase 2C(Ilkap)
ENSMUSG00000029310	NUDT9	Mus musculus	nudix (nucleoside diphosphate linked moiety X)-type motif 9(Nudt9)
ENSMUSG00000039419	CNTNAP2	Mus musculus	contactin associated protein-like 2(Cntnap2)
ENSMUSG00000038482	TFDP1	Mus musculus	transcription factor Dp 1(Tfdp1)
ENSMUSG00000026307	SCLY	Mus musculus	selenocysteine lyase(Scly)
ENSMUSG00000020354	SGCD	Mus musculus	sarcoglycan, delta (dystrophin-associated glycoprotein)(Sgcd)
ENSMUSG00000015134	ALDH1A3	Mus musculus	aldehyde dehydrogenase family 1, subfamily A3(Aldh1a3)
ENSMUSG00000034913	SPERT	Mus musculus	spermatid associated(Spert)
ENSMUSG00000039414	HEATR5B	Mus musculus	HEAT repeat containing 5B(Heatr5b)
ENSMUSG00000034918	CDHR2	Mus musculus	cadherin-related family member 2(Cdhr2)
ENSMUSG00000026827	GPD2	Mus musculus	glycerol phosphate dehydrogenase 2, mitochondrial(Gpd2)
ENSMUSG00000026825	DNM1	Mus musculus	dynamin 1(Dnm1)
ENSMUSG00000028560	USP1	Mus musculus	ubiquitin specific peptidase 1(Usp1)
ENSMUSG00000042784	MUC1	Mus musculus	mucin 1, transmembrane(Muc1)
ENSMUSG00000050645	Defb19	Mus musculus	defensin beta 19(Defb19)
ENSMUSG00000030862	CPXM2	Mus musculus	carboxypeptidase X 2 (M14 family)(Cpxm2)
ENSMUSG00000030037	MRPL53	Mus musculus	mitochondrial ribosomal protein L53(Mrpl53)
ENSMUSG00000026811	ST6GALNAC6	Mus musculus	ST6 (alpha-N-acetyl-neuraminyl-2,3-beta-galactosyl-1,3)-N-acetylgalactosaminide alpha-2,6-sialyltransferase 6(St6galnac6)
ENSMUSG00000030036	MOGS	Mus musculus	mannosyl-oligosaccharide glucosidase(Mogs)
ENSMUSG00000025816	SEC61A2	Mus musculus	Sec61, alpha subunit 2 (S. cerevisiae)(Sec61a2)
ENSMUSG00000027957	SLC35A3	Mus musculus	solute carrier family 35 (UDP-N-acetylglucosamine (UDP-GlcNAc) transporter), member 3(Slc35a3)
ENSMUSG00000025813	HOMER2	Mus musculus	homer scaffolding protein 2(Homer2)
ENSMUSG00000025812	PARD3	Mus musculus	par-3 family cell polarity regulator(Pard3)
ENSMUSG00000021048	MTHFD1	Mus musculus	methylenetetrahydrofolate dehydrogenase (NADP+ dependent), methenyltetrahydrofolate cyclohydrolase, formyltetrahydrofolate synthase(Mthfd1)
ENSMUSG00000038256	BCL9	Mus musculus	B cell CLL/lymphoma 9(Bcl9)
ENSMUSG00000026421	CSRP1	Mus musculus	cysteine and glycine-rich protein 1(Csrp1)
ENSMUSG00000004677	MYO9B	Mus musculus	myosin IXb(Myo9b)
ENSMUSG00000039405	PRSS23	Mus musculus	protease, serine 23(Prss23)
ENSMUSG00000030447	CYFIP1	Mus musculus	cytoplasmic FMR1 interacting protein 1(Cyfip1)
ENSMUSG00000028555	TTC39A	Mus musculus	tetratricopeptide repeat domain 39A(Ttc39a)
ENSMUSG00000026427	EIF2D	Mus musculus	eukaryotic translation initiation factor 2D(Eif2d)
ENSMUSG00000027953	SLC50A1	Mus musculus	solute carrier family 50 (sugar transporter), member 1(Slc50a1)
ENSMUSG00000026426	ARL8A	Mus musculus	ADP-ribosylation factor-like 8A(Arl8a)
ENSMUSG00000040521	TSFM	Mus musculus	Ts translation elongation factor, mitochondrial(Tsfm)
ENSMUSG00000034928	RNF44	Mus musculus	ring finger protein 44(Rnf44)
ENSMUSG00000049580	TSKU	Mus musculus	tsukushi, small leucine rich proteoglycan(Tsku)
ENSMUSG00000074102	RBM15B	Mus musculus	RNA binding motif protein 15B(Rbm15b)
ENSMUSG00000015120	UBE2I	Mus musculus	ubiquitin-conjugating enzyme E2I(Ube2i)
ENSMUSG00000079434	NEU2	Mus musculus	neuraminidase 2(Neu2)
ENSMUSG00000026817	AK1	Mus musculus	adenylate kinase 1(Ak1)
ENSMUSG00000015890	AMDHD1	Mus musculus	amidohydrolase domain containing 1(Amdhd1)
ENSMUSG00000020333	ACSL6	Mus musculus	acyl-CoA synthetase long-chain family member 6(Acsl6)
ENSMUSG00000001227	SEMA6B	Mus musculus	sema domain, transmembrane domain (TM), and cytoplasmic domain, (semaphorin) 6B(Sema6b)
ENSMUSG00000023267	GABRR2	Mus musculus	gamma-aminobutyric acid (GABA) C receptor, subunit rho 2(Gabrr2)
ENSMUSG00000037820	TGM2	Mus musculus	transglutaminase 2, C polypeptide(Tgm2)
ENSMUSG00000001228	UHRF1	Mus musculus	ubiquitin-like, containing PHD and RING finger domains, 1(Uhrf1)
ENSMUSG00000001229	DPP9	Mus musculus	dipeptidylpeptidase 9(Dpp9)
ENSMUSG00000026883	DAB2IP	Mus musculus	disabled 2 interacting protein(Dab2ip)
ENSMUSG00000046756	MRPS7	Mus musculus	mitchondrial ribosomal protein S7(Mrps7)
ENSMUSG00000027488	SNTA1	Mus musculus	syntrophin, acidic 1(Snta1)
ENSMUSG00000018819	LSP1	Mus musculus	lymphocyte specific 1(Lsp1)
ENSMUSG00000037434	SLC30A1	Mus musculus	solute carrier family 30 (zinc transporter), member 1(Slc30a1)
ENSMUSG00000002803	BTBD6	Mus musculus	BTB (POZ) domain containing 6(Btbd6)
ENSMUSG00000026470	STX6	Mus musculus	syntaxin 6(Stx6)
ENSMUSG00000003531	dgcr6	Mus musculus	DiGeorge syndrome critical region gene 6(Dgcr6)
ENSMUSG00000001225	SLC26A3	Mus musculus	solute carrier family 26, member 3(Slc26a3)
ENSMUSG00000003534	ddr1	Mus musculus	discoidin domain receptor family, member 1(Ddr1)
ENSMUSG00000049538	ADAMTS16	Mus musculus	a disintegrin-like and metallopeptidase (reprolysin type) with thrombospondin type 1 motif, 16(Adamts16)
ENSMUSG00000049537	TECRL	Mus musculus	trans-2,3-enoyl-CoA reductase-like(Tecrl)
ENSMUSG00000030805	Stx4a	Mus musculus	syntaxin 4A (placental)(Stx4a)
ENSMUSG00000021024	PSMA6	Mus musculus	proteasome (prosome, macropain) subunit, alpha type 6(Psma6)
ENSMUSG00000023277	TWF2	Mus musculus	twinfilin actin binding protein 2(Twf2)
ENSMUSG00000038279	NOP2	Mus musculus	NOP2 nucleolar protein(Nop2)
ENSMUSG00000003131	PAFAH1B2	Mus musculus	platelet-activating factor acetylhydrolase, isoform 1b, subunit 2(Pafah1b2)
ENSMUSG00000020340	cyfip2	Mus musculus	cytoplasmic FMR1 interacting protein 2(Cyfip2)
ENSMUSG00000014748	TEX261	Mus musculus	testis expressed gene 261(Tex261)
ENSMUSG00000020739	NUP85	Mus musculus	nucleoporin 85(Nup85)
ENSMUSG00000014303	GLIS2	Mus musculus	GLIS family zinc finger 2(Glis2)
ENSMUSG00000020732	RAB37	Mus musculus	RAB37, member RAS oncogene family(Rab37)
ENSMUSG00000026872	ZEB2	Mus musculus	zinc finger E-box binding homeobox 2(Zeb2)
ENSMUSG00000027499	PKIA	Mus musculus	protein kinase inhibitor, alpha(Pkia)
ENSMUSG00000048930	TADA3	Mus musculus	transcriptional adaptor 3(Tada3)
ENSMUSG00000026873	PHF19	Mus musculus	PHD finger protein 19(Phf19)
ENSMUSG00000054690	EMCN	Mus musculus	endomucin(Emcn)
ENSMUSG00000034908	SIDT2	Mus musculus	SID1 transmembrane family, member 2(Sidt2)
ENSMUSG00000038280	OSTM1	Mus musculus	osteopetrosis associated transmembrane protein 1(Ostm1)
ENSMUSG00000046761	fam83h	Mus musculus	family with sequence similarity 83, member H(Fam83h)
ENSMUSG00000018401	MTMR4	Mus musculus	myotubularin related protein 4(Mtmr4)
ENSMUSG00000026356	DARS	Mus musculus	aspartyl-tRNA synthetase(Dars)
ENSMUSG00000034903	COBLL1	Mus musculus	Cobl-like 1(Cobll1)
ENSMUSG00000030428	TTYH1	Mus musculus	tweety family member 1(Ttyh1)
ENSMUSG00000064105	CNNM2	Mus musculus	cyclin M2(Cnnm2)
ENSMUSG00000037843	VSTM2L	Mus musculus	V-set and transmembrane domain containing 2-like(Vstm2l)
ENSMUSG00000020728	CEP112	Mus musculus	centrosomal protein 112(Cep112)
ENSMUSG00000030814	BCL7C	Mus musculus	B cell CLL/lymphoma 7C(Bcl7c)
ENSMUSG00000020720	PSMD12	Mus musculus	proteasome (prosome, macropain) 26S subunit, non-ATPase, 12(Psmd12)
ENSMUSG00000027465	TBC1D20	Mus musculus	TBC1 domain family, member 20(Tbc1d20)
ENSMUSG00000036391	sec24a	Mus musculus	Sec24 related gene family, member A (S. cerevisiae)(Sec24a)
ENSMUSG00000026867	GAPVD1	Mus musculus	GTPase activating protein and VPS9 domains 1(Gapvd1)
ENSMUSG00000036390	GADD45A	Mus musculus	growth arrest and DNA-damage-inducible 45 alpha(Gadd45a)
ENSMUSG00000027075	SLC43A1	Mus musculus	solute carrier family 43, member 1(Slc43a1)
ENSMUSG00000045775	SLC16A5	Mus musculus	solute carrier family 16 (monocarboxylic acid transporters), member 5(Slc16a5)
ENSMUSG00000046733	GPRC5A	Mus musculus	G protein-coupled receptor, family C, group 5, member A(Gprc5a)
ENSMUSG00000048924	CCDC125	Mus musculus	coiled-coil domain containing 125(Ccdc125)
ENSMUSG00000021843	KTN1	Mus musculus	kinectin 1(Ktn1)
ENSMUSG00000026455	KLHL12	Mus musculus	kelch-like 12(Klhl12)
ENSMUSG00000020312	SHC2	Mus musculus	SHC (Src homology 2 domain containing) transforming protein 2(Shc2)
ENSMUSG00000018417	MYO1B	Mus musculus	myosin IB(Myo1b)
ENSMUSG00000048425	Olfr686	Mus musculus	olfactory receptor 686(Olfr686)
ENSMUSG00000026457	ADIPOR1	Mus musculus	adiponectin receptor 1(Adipor1)
ENSMUSG00000074925	PTAR1	Mus musculus	protein prenyltransferase alpha subunit repeat containing 1(Ptar1)
ENSMUSG00000000157	Itgb2l	Mus musculus	integrin beta 2-like(Itgb2l)
ENSMUSG00000026344	LYPD1	Mus musculus	Ly6/Plaur domain containing 1(Lypd1)
ENSMUSG00000018012	RAC3	Mus musculus	RAS-related C3 botulinum substrate 3(Rac3)
ENSMUSG00000034112	ATP2C2	Mus musculus	ATPase, Ca++ transporting, type 2C, member 2(Atp2c2)
ENSMUSG00000021000	mia2	Mus musculus	melanoma inhibitory activity 2(Mia2)
ENSMUSG00000029344	TPST2	Mus musculus	protein-tyrosine sulfotransferase 2(Tpst2)
ENSMUSG00000034116	VAV1	Mus musculus	vav 1 oncogene(Vav1)
ENSMUSG00000027475	KIF3B	Mus musculus	kinesin family member 3B(Kif3b)
ENSMUSG00000038299	WDR36	Mus musculus	WD repeat domain 36(Wdr36)
ENSMUSG00000030822	prr14	Mus musculus	proline rich 14(Prr14)
ENSMUSG00000026854	USP20	Mus musculus	ubiquitin specific peptidase 20(Usp20)
ENSMUSG00000054679	SRSF12	Mus musculus	serine/arginine-rich splicing factor 12(Srsf12)
ENSMUSG00000037446	TULP1	Mus musculus	tubby like protein 1(Tulp1)
ENSMUSG00000028597	GPX7	Mus musculus	glutathione peroxidase 7(Gpx7)
ENSMUSG00000003119	CDK12	Mus musculus	cyclin-dependent kinase 12(Cdk12)
ENSMUSG00000030407	QPCTL	Mus musculus	glutaminyl-peptide cyclotransferase-like(Qpctl)
ENSMUSG00000051043	GPRC5C	Mus musculus	G protein-coupled receptor, family C, group 5, member C(Gprc5c)
ENSMUSG00000018428	AKAP1	Mus musculus	A kinase (PRKA) anchor protein 1(Akap1)
ENSMUSG00000020323	PRSS57	Mus musculus	protease, serine 57(Prss57)
ENSMUSG00000028599	TNFRSF1B	Mus musculus	tumor necrosis factor receptor superfamily, member 1b(Tnfrsf1b)
ENSMUSG00000026469	XPR1	Mus musculus	xenotropic and polytropic retrovirus receptor 1(Xpr1)
ENSMUSG00000037857	NUFIP2	Mus musculus	nuclear fragile X mental retardation protein interacting protein 2(Nufip2)
ENSMUSG00000074916	CHST14	Mus musculus	carbohydrate (N-acetylgalactosamine 4-0) sulfotransferase 14(Chst14)
ENSMUSG00000074817	PAPOLB	Mus musculus	poly (A) polymerase beta (testis specific)(Papolb)
ENSMUSG00000023781	HES7	Mus musculus	hairy and enhancer of split 7 (Drosophila)(Hes7)
ENSMUSG00000095276	Gfy	Mus musculus	golgi-associated olfactory signaling regulator(Gfy)
ENSMUSG00000059336	SLC14A1	Mus musculus	solute carrier family 14 (urea transporter), member 1(Slc14a1)
ENSMUSG00000060636	RPL35A	Mus musculus	ribosomal protein L35A(Rpl35a)
ENSMUSG00000060630	Zfp735	Mus musculus	zinc finger protein 735(Zfp735)
ENSMUSG00000020124	USP15	Mus musculus	ubiquitin specific peptidase 15(Usp15)
ENSMUSG00000030541	IDH2	Mus musculus	isocitrate dehydrogenase 2 (NADP+), mitochondrial(Idh2)
ENSMUSG00000027502	RTFDC1	Mus musculus	replication termination factor 2 domain containing 1(Rtfdc1)
ENSMUSG00000056481	CD248	Mus musculus	CD248 antigen, endosialin(Cd248)
ENSMUSG00000030533	UNC45A	Mus musculus	unc-45 myosin chaperone A(Unc45a)
ENSMUSG00000006651	APLP1	Mus musculus	amyloid beta (A4) precursor-like protein 1(Aplp1)
ENSMUSG00000037949	ANO10	Mus musculus	anoctamin 10(Ano10)
ENSMUSG00000020114	CAND1	Mus musculus	cullin associated and neddylation disassociated 1(Cand1)
ENSMUSG00000039168	DAP	Mus musculus	death-associated protein(Dap)
ENSMUSG00000039167	ADGRL4	Mus musculus	adhesion G protein-coupled receptor L4(Adgrl4)
ENSMUSG00000039166	AKAP7	Mus musculus	A kinase (PRKA) anchor protein 7(Akap7)
ENSMUSG00000006262	MOB1B	Mus musculus	MOB kinase activator 1B(Mob1b)
ENSMUSG00000039579	GRIN3A	Mus musculus	glutamate receptor ionotropic, NMDA3A(Grin3a)
ENSMUSG00000019373	COPS3	Mus musculus	COP9 signalosome subunit 3(Cops3)
ENSMUSG00000059323	VPS28	Mus musculus	vacuolar protein sorting 28(Vps28)
ENSMUSG00000056204	PGPEP1	Mus musculus	pyroglutamyl-peptidase I(Pgpep1)
ENSMUSG00000022253	NADK2	Mus musculus	NAD kinase 2, mitochondrial(Nadk2)
ENSMUSG00000020111	MICU1	Mus musculus	mitochondrial calcium uptake 1(Micu1)
ENSMUSG00000027506	TPD52	Mus musculus	tumor protein D52(Tpd52)
ENSMUSG00000019796	LRP11	Mus musculus	low density lipoprotein receptor-related protein 11(Lrp11)
ENSMUSG00000059741	MYL3	Mus musculus	myosin, light polypeptide 3(Myl3)
ENSMUSG00000059742	KCNH7	Mus musculus	potassium voltage-gated channel, subfamily H (eag-related), member 7(Kcnh7)
ENSMUSG00000025223	LDB1	Mus musculus	LIM domain binding 1(Ldb1)
ENSMUSG00000059743	FDPS	Mus musculus	farnesyl diphosphate synthetase(Fdps)
ENSMUSG00000025221	kcnip2	Mus musculus	Kv channel-interacting protein 2(Kcnip2)
ENSMUSG00000019791	HINT3	Mus musculus	histidine triad nucleotide binding protein 3(Hint3)
ENSMUSG00000030523	TRPM1	Mus musculus	transient receptor potential cation channel, subfamily M, member 1(Trpm1)
ENSMUSG00000003099	PPP5C	Mus musculus	protein phosphatase 5, catalytic subunit(Ppp5c)
ENSMUSG00000053062	JAM2	Mus musculus	junction adhesion molecule 2(Jam2)
ENSMUSG00000051864	TBC1D22A	Mus musculus	TBC1 domain family, member 22a(Tbc1d22a)
ENSMUSG00000056458	MOK	Mus musculus	MOK protein kinase(Mok)
ENSMUSG00000047648	FBXO30	Mus musculus	F-box protein 30(Fbxo30)
ENSMUSG00000006273	ATP6V1B2	Mus musculus	ATPase, H+ transporting, lysosomal V1 subunit B2(Atp6v1b2)
ENSMUSG00000037149	DDX1	Mus musculus	DEAD (Asp-Glu-Ala-Asp) box polypeptide 1(Ddx1)
ENSMUSG00000026077	NPAS2	Mus musculus	neuronal PAS domain protein 2(Npas2)
ENSMUSG00000022288	4930447A16Rik	Mus musculus	RIKEN cDNA 4930447A16 gene(4930447A16Rik)
ENSMUSG00000026074	map4k4	Mus musculus	mitogen-activated protein kinase kinase kinase kinase 4(Map4k4)
ENSMUSG00000026072	IL1R1	Mus musculus	interleukin 1 receptor, type I(Il1r1)
ENSMUSG00000037148	ARHGAP10	Mus musculus	Rho GTPase activating protein 10(Arhgap10)
ENSMUSG00000025236	ADPGK	Mus musculus	ADP-dependent glucokinase(Adpgk)
ENSMUSG00000030516	TJP1	Mus musculus	tight junction protein 1(Tjp1)
ENSMUSG00000025239	LIMD1	Mus musculus	LIM domains containing 1(Limd1)
ENSMUSG00000025232	HEXA	Mus musculus	hexosaminidase A(Hexa)
ENSMUSG00000024101	WASH1	Mus musculus	WAS protein family homolog 1(Wash1)
ENSMUSG00000019782	RWDD1	Mus musculus	RWD domain containing 1(Rwdd1)
ENSMUSG00000030519	APBA2	Mus musculus	amyloid beta (A4) precursor protein-binding, family A, member 2(Apba2)
ENSMUSG00000006289	OSGEP	Mus musculus	O-sialoglycoprotein endopeptidase(Osgep)
ENSMUSG00000037151	LRRC20	Mus musculus	leucine rich repeat containing 20(Lrrc20)
ENSMUSG00000039599	Fam149b	Mus musculus	family with sequence similarity 149, member B(Fam149b)
ENSMUSG00000020130	TBC1D15	Mus musculus	TBC1 domain family, member 15(Tbc1d15)
ENSMUSG00000037966	NINJ1	Mus musculus	ninjurin 1(Ninj1)
ENSMUSG00000002409	DYRK1B	Mus musculus	dual-specificity tyrosine-(Y)-phosphorylation regulated kinase 1b(Dyrk1b)
ENSMUSG00000037157	IL22RA1	Mus musculus	interleukin 22 receptor, alpha 1(Il22ra1)
ENSMUSG00000027552	E2F5	Mus musculus	E2F transcription factor 5(E2f5)
ENSMUSG00000033871	PPARGC1B	Mus musculus	peroxisome proliferative activated receptor, gamma, coactivator 1 beta(Ppargc1b)
ENSMUSG00000046138	9930021J03Rik	Mus musculus	RIKEN cDNA 9930021J03 gene(9930021J03Rik)
ENSMUSG00000005982	NAA60	Mus musculus	N(alpha)-acetyltransferase 60, NatF catalytic subunit(Naa60)
ENSMUSG00000025240	SACM1L	Mus musculus	SAC1 suppressor of actin mutations 1-like (yeast)(Sacm1l)
ENSMUSG00000003032	KLF4	Mus musculus	Kruppel-like factor 4 (gut)(Klf4)
ENSMUSG00000040929	RFX3	Mus musculus	regulatory factor X, 3 (influences HLA class II expression)(Rfx3)
ENSMUSG00000041528	RNF123	Mus musculus	ring finger protein 123(Rnf123)
ENSMUSG00000030584	dpf1	Mus musculus	D4, zinc and double PHD fingers family 1(Dpf1)
ENSMUSG00000037999	ARAP2	Mus musculus	ArfGAP with RhoGAP domain, ankyrin repeat and PH domain 2(Arap2)
ENSMUSG00000040488	LTBP4	Mus musculus	latent transforming growth factor beta binding protein 4(Ltbp4)
ENSMUSG00000002307	DAXX	Mus musculus	Fas death domain-associated protein(Daxx)
ENSMUSG00000007036	ABHD16A	Mus musculus	abhydrolase domain containing 16A(Abhd16a)
ENSMUSG00000037990	SH3RF3	Mus musculus	SH3 domain containing ring finger 3(Sh3rf3)
ENSMUSG00000027540	PTPN1	Mus musculus	protein tyrosine phosphatase, non-receptor type 1(Ptpn1)
ENSMUSG00000051890	KLHDC1	Mus musculus	kelch domain containing 1(Klhdc1)
ENSMUSG00000027546	ATP9A	Mus musculus	ATPase, class II, type 9A(Atp9a)
ENSMUSG00000038764	PTPN3	Mus musculus	protein tyrosine phosphatase, non-receptor type 3(Ptpn3)
ENSMUSG00000040918	SLC19A2	Mus musculus	solute carrier family 19 (thiamine transporter), member 2(Slc19a2)
ENSMUSG00000038762	ABCF1	Mus musculus	ATP-binding cassette, sub-family F (GCN20), member 1(Abcf1)
ENSMUSG00000052934	FBXO31	Mus musculus	F-box protein 31(Fbxo31)
ENSMUSG00000029650	SLC46A3	Mus musculus	solute carrier family 46, member 3(Slc46a3)
ENSMUSG00000040479	DGKZ	Mus musculus	diacylglycerol kinase zeta(Dgkz)
ENSMUSG00000019338	Zfp687	Mus musculus	zinc finger protein 687(Zfp687)
ENSMUSG00000026021	SUMO1	Mus musculus	small ubiquitin-like modifier 1(Sumo1)
ENSMUSG00000022212	CPNE6	Mus musculus	copine VI(Cpne6)
ENSMUSG00000007029	VARS	Mus musculus	valyl-tRNA synthetase(Vars)
ENSMUSG00000051896	TEX37	Mus musculus	testis expressed 37(Tex37)
ENSMUSG00000027570	COL9A3	Mus musculus	collagen, type IX, alpha 3(Col9a3)
ENSMUSG00000002320	TM9SF1	Mus musculus	transmembrane 9 superfamily member 1(Tm9sf1)
ENSMUSG00000035877	ZHX3	Mus musculus	zinc fingers and homeoboxes 3(Zhx3)
ENSMUSG00000027575	ARFGAP1	Mus musculus	ADP-ribosylation factor GTPase activating protein 1(Arfgap1)
ENSMUSG00000020109	DNAJB12	Mus musculus	DnaJ heat shock protein family (Hsp40) member B12(Dnajb12)
ENSMUSG00000067279	PPP1R3C	Mus musculus	protein phosphatase 1, regulatory (inhibitor) subunit 3C(Ppp1r3c)
ENSMUSG00000022244	AMACR	Mus musculus	alpha-methylacyl-CoA racemase(Amacr)
ENSMUSG00000002329	MDP1	Mus musculus	magnesium-dependent phosphatase 1(Mdp1)
ENSMUSG00000068917	CLK2	Mus musculus	CDC-like kinase 2(Clk2)
ENSMUSG00000041540	SOX5	Mus musculus	SRY (sex determining region Y)-box 5(Sox5)
ENSMUSG00000029669	TSPAN12	Mus musculus	tetraspanin 12(Tspan12)
ENSMUSG00000042608	STK40	Mus musculus	serine/threonine kinase 40(Stk40)
ENSMUSG00000047696	Ccdc144b	Mus musculus	coiled-coil domain containing 144B(Ccdc144b)
ENSMUSG00000046168	KCNRG	Mus musculus	potassium channel regulator(Kcnrg)
ENSMUSG00000038780	SMURF1	Mus musculus	SMAD specific E3 ubiquitin protein ligase 1(Smurf1)
ENSMUSG00000005973	RCN1	Mus musculus	reticulocalbin 1(Rcn1)
ENSMUSG00000022237	ANKRD33B	Mus musculus	ankyrin repeat domain 33B(Ankrd33b)
ENSMUSG00000039831	ARHGAP29	Mus musculus	Rho GTPase activating protein 29(Arhgap29)
ENSMUSG00000060621	NKPD1	Mus musculus	NTPase, KAP family P-loop domain containing 1(Nkpd1)
ENSMUSG00000035863	PALM	Mus musculus	paralemmin(Palm)
ENSMUSG00000046999	1110032F04Rik	Mus musculus	RIKEN cDNA 1110032F04 gene(1110032F04Rik)
ENSMUSG00000025665	RPS6KA6	Mus musculus	ribosomal protein S6 kinase polypeptide 6(Rps6ka6)
ENSMUSG00000075571	Defb30	Mus musculus	defensin beta 30(Defb30)
ENSMUSG00000062859	TCP11	Mus musculus	t-complex protein 11(Tcp11)
ENSMUSG00000007041	CLIC1	Mus musculus	chloride intracellular channel 1(Clic1)
ENSMUSG00000068921	DAP3	Mus musculus	death associated protein 3(Dap3)
ENSMUSG00000078185	CHML	Mus musculus	choroideremia-like(Chml)
ENSMUSG00000032309	FBXO22	Mus musculus	F-box protein 22(Fbxo22)
ENSMUSG00000074890	lcmt2	Mus musculus	leucine carboxyl methyltransferase 2(Lcmt2)
ENSMUSG00000032305	FAM219B	Mus musculus	family with sequence similarity 219, member B(Fam219b)
ENSMUSG00000024566	ATP9B	Mus musculus	ATPase, class II, type 9B(Atp9b)
ENSMUSG00000038717	ATP5L	Mus musculus	ATP synthase, H+ transporting, mitochondrial F0 complex, subunit G(Atp5l)
ENSMUSG00000061313	DDHD2	Mus musculus	DDHD domain containing 2(Ddhd2)
ENSMUSG00000034762	GLIS1	Mus musculus	GLIS family zinc finger 1(Glis1)
ENSMUSG00000024560	CXXC1	Mus musculus	CXXC finger 1 (PHD domain)(Cxxc1)
ENSMUSG00000001844	ZDHHC4	Mus musculus	zinc finger, DHHC domain containing 4(Zdhhc4)
ENSMUSG00000066613	Zfp932	Mus musculus	zinc finger protein 932(Zfp932)
ENSMUSG00000028648	NDUFS5	Mus musculus	NADH dehydrogenase (ubiquinone) Fe-S protein 5(Ndufs5)
ENSMUSG00000028646	RRAGC	Mus musculus	Ras-related GTP binding C(Rragc)
ENSMUSG00000002458	RGS19	Mus musculus	regulator of G-protein signaling 19(Rgs19)
ENSMUSG00000039844	RAPGEF1	Mus musculus	Rap guanine nucleotide exchange factor (GEF) 1(Rapgef1)
ENSMUSG00000002342	TMEM161A	Mus musculus	transmembrane protein 161A(Tmem161a)
ENSMUSG00000002455	PRPF6	Mus musculus	pre-mRNA splicing factor 6(Prpf6)
ENSMUSG00000028640	TFAP2C	Mus musculus	transcription factor AP-2, gamma(Tfap2c)
ENSMUSG00000079227	CCR5	Mus musculus	chemokine (C-C motif) receptor 5(Ccr5)
ENSMUSG00000030083	ABTB1	Mus musculus	ankyrin repeat and BTB (POZ) domain containing 1(Abtb1)
ENSMUSG00000030087	KLF15	Mus musculus	Kruppel-like factor 15(Klf15)
ENSMUSG00000024150	MCFD2	Mus musculus	multiple coagulation factor deficiency 2(Mcfd2)
ENSMUSG00000050390	C77080	Mus musculus	expressed sequence C77080(C77080)
ENSMUSG00000024556	ME2	Mus musculus	malic enzyme 2, NAD(+)-dependent, mitochondrial(Me2)
ENSMUSG00000028636	PPCS	Mus musculus	phosphopantothenoylcysteine synthetase(Ppcs)
ENSMUSG00000081984	DNAJB3	Mus musculus	DnaJ heat shock protein family (Hsp40) member B3(Dnajb3)
ENSMUSG00000032705	EXD2	Mus musculus	exonuclease 3'-5' domain containing 2(Exd2)
ENSMUSG00000028637	CCDC30	Mus musculus	coiled-coil domain containing 30(Ccdc30)
ENSMUSG00000034758	TLE6	Mus musculus	transducin-like enhancer of split 6(Tle6)
ENSMUSG00000024558	MAPK4	Mus musculus	mitogen-activated protein kinase 4(Mapk4)
ENSMUSG00000030074	GXYLT2	Mus musculus	glucoside xylosyltransferase 2(Gxylt2)
ENSMUSG00000005124	WISP1	Mus musculus	WNT1 inducible signaling pathway protein 1(Wisp1)
ENSMUSG00000014075	TCTEX1D2	Mus musculus	Tctex1 domain containing 2(Tctex1d2)
ENSMUSG00000040952	RPS19	Mus musculus	ribosomal protein S19(Rps19)
ENSMUSG00000039850	ENDOV	Mus musculus	endonuclease V(Endov)
ENSMUSG00000033009	OGFOD1	Mus musculus	2-oxoglutarate and iron-dependent oxygenase domain containing 1(Ogfod1)
ENSMUSG00000012123	AIM1L	Mus musculus	absent in melanoma 1-like(Aim1l)
ENSMUSG00000062825	ACTG1	Mus musculus	actin, gamma, cytoplasmic 1(Actg1)
ENSMUSG00000068959	Zfp619	Mus musculus	zinc finger protein 619(Zfp619)
ENSMUSG00000033007	ASIC4	Mus musculus	acid-sensing (proton-gated) ion channel family member 4(Asic4)
ENSMUSG00000036098	MYRF	Mus musculus	myelin regulatory factor(Myrf)
ENSMUSG00000038738	SHANK1	Mus musculus	SH3/ankyrin domain gene 1(Shank1)
ENSMUSG00000002365	SNX9	Mus musculus	sorting nexin 9(Snx9)
ENSMUSG00000043342	HOXD9	Mus musculus	homeobox D9(Hoxd9)
ENSMUSG00000002477	SNRPD1	Mus musculus	small nuclear ribonucleoprotein D1(Snrpd1)
ENSMUSG00000038732	MBOAT1	Mus musculus	membrane bound O-acyltransferase domain containing 1(Mboat1)
ENSMUSG00000028661	EPHA8	Mus musculus	Eph receptor A8(Epha8)
ENSMUSG00000015474	PPT2	Mus musculus	palmitoyl-protein thioesterase 2(Ppt2)
ENSMUSG00000033845	MRPL15	Mus musculus	mitochondrial ribosomal protein L15(Mrpl15)
ENSMUSG00000024579	PCYOX1L	Mus musculus	prenylcysteine oxidase 1 like(Pcyox1l)
ENSMUSG00000005936	KCTD20	Mus musculus	potassium channel tetramerisation domain containing 20(Kctd20)
ENSMUSG00000002871	TPRA1	Mus musculus	transmembrane protein, adipocyte asscociated 1(Tpra1)
ENSMUSG00000063458	1700112E06Rik	Mus musculus	RIKEN cDNA 1700112E06 gene(1700112E06Rik)
ENSMUSG00000030590	FAM98C	Mus musculus	family with sequence similarity 98, member C(Fam98c)
ENSMUSG00000052911	LAMB2	Mus musculus	laminin, beta 2(Lamb2)
ENSMUSG00000030091	NUP210	Mus musculus	nucleoporin 210(Nup210)
ENSMUSG00000039879	HECA	Mus musculus	hdc homolog, cell cycle regulator(Heca)
ENSMUSG00000039878	SLC39A5	Mus musculus	solute carrier family 39 (metal ion transporter), member 5(Slc39a5)
ENSMUSG00000030093	WNT7A	Mus musculus	wingless-type MMTV integration site family, member 7A(Wnt7a)
ENSMUSG00000032726	BMP8A	Mus musculus	bone morphogenetic protein 8a(Bmp8a)
ENSMUSG00000024188	LUC7L	Mus musculus	Luc7-like(Luc7l)
ENSMUSG00000024187	FAM234A	Mus musculus	family with sequence similarity 234, member A(Fam234a)
ENSMUSG00000049489	Fam58b	Mus musculus	family with sequence similarity 58, member B(Fam58b)
ENSMUSG00000030098	GRIP2	Mus musculus	glutamate receptor interacting protein 2(Grip2)
ENSMUSG00000052917	SENP7	Mus musculus	SUMO1/sentrin specific peptidase 7(Senp7)
ENSMUSG00000042216	SGSM1	Mus musculus	small G protein signaling modulator 1(Sgsm1)
ENSMUSG00000074886	GRK6	Mus musculus	G protein-coupled receptor kinase 6(Grk6)
ENSMUSG00000015461	ATF6B	Mus musculus	activating transcription factor 6 beta(Atf6b)
ENSMUSG00000042213	ZFAND4	Mus musculus	zinc finger, AN1-type domain 4(Zfand4)
ENSMUSG00000033016	NFATC1	Mus musculus	nuclear factor of activated T cells, cytoplasmic, calcineurin dependent 1(Nfatc1)
ENSMUSG00000049482	CTU2	Mus musculus	cytosolic thiouridylase subunit 2(Ctu2)
ENSMUSG00000026095	ASNSD1	Mus musculus	asparagine synthetase domain containing 1(Asnsd1)
ENSMUSG00000006219	FBLIM1	Mus musculus	filamin binding LIM protein 1(Fblim1)
ENSMUSG00000026097	ORMDL1	Mus musculus	ORM1-like 1 (S. cerevisiae)(Ormdl1)
ENSMUSG00000028607	cpt2	Mus musculus	carnitine palmitoyltransferase 2(Cpt2)
ENSMUSG00000004100	PPAN	Mus musculus	peter pan homolog (Drosophila)(Ppan)
ENSMUSG00000042289	HSD3B7	Mus musculus	hydroxy-delta-5-steroid dehydrogenase, 3 beta- and steroid delta-isomerase 7(Hsd3b7)
ENSMUSG00000017670	elmo2	Mus musculus	engulfment and cell motility 2(Elmo2)
ENSMUSG00000024526	CIDEA	Mus musculus	cell death-inducing DNA fragmentation factor, alpha subunit-like effector A(Cidea)
ENSMUSG00000071654	UQCC3	Mus musculus	ubiquinol-cytochrome c reductase complex assembly factor 3(Uqcc3)
ENSMUSG00000032340	NEO1	Mus musculus	neogenin(Neo1)
ENSMUSG00000069237	FAM8A1	Mus musculus	family with sequence similarity 8, member A1(Fam8a1)
ENSMUSG00000031169	porcn	Mus musculus	porcupine homolog (Drosophila)(Porcn)
ENSMUSG00000028602	TNFRSF8	Mus musculus	tumor necrosis factor receptor superfamily, member 8(Tnfrsf8)
ENSMUSG00000016942	tmprss6	Mus musculus	transmembrane serine protease 6(Tmprss6)
ENSMUSG00000039887	ALG14	Mus musculus	asparagine-linked glycosylation 14(Alg14)
ENSMUSG00000021215	NET1	Mus musculus	neuroepithelial cell transforming gene 1(Net1)
ENSMUSG00000034724	CNOT6L	Mus musculus	CCR4-NOT transcription complex, subunit 6-like(Cnot6l)
ENSMUSG00000017679	TTPAL	Mus musculus	tocopherol (alpha) transfer protein-like(Ttpal)
ENSMUSG00000037001	Zfp39	Mus musculus	zinc finger protein 39(Zfp39)
ENSMUSG00000031174	RPGR	Mus musculus	retinitis pigmentosa GTPase regulator(Rpgr)
ENSMUSG00000058239	USF2	Mus musculus	upstream transcription factor 2(Usf2)
ENSMUSG00000040990	SH3KBP1	Mus musculus	SH3-domain kinase binding protein 1(Sh3kbp1)
ENSMUSG00000033039	MICALL1	Mus musculus	microtubule associated monooxygenase, calponin and LIM domain containing -like 1(Micall1)
ENSMUSG00000054309	CPSF3	Mus musculus	cleavage and polyadenylation specificity factor 3(Cpsf3)
ENSMUSG00000005917	OTX1	Mus musculus	orthodenticle homeobox 1(Otx1)
ENSMUSG00000040998	NPNT	Mus musculus	nephronectin(Npnt)
ENSMUSG00000040007	BAHD1	Mus musculus	bromo adjacent homology domain containing 1(Bahd1)
ENSMUSG00000037013	SS18	Mus musculus	synovial sarcoma translocation, Chromosome 18(Ss18)
ENSMUSG00000024516	SEC11C	Mus musculus	SEC11 homolog C, signal peptidase complex subunit(Sec11c)
ENSMUSG00000079277	HOXD3	Mus musculus	homeobox D3(Hoxd3)
ENSMUSG00000033032	AFAP1L1	Mus musculus	actin filament associated protein 1-like 1(Afap1l1)
ENSMUSG00000017664	SLC35C2	Mus musculus	solute carrier family 35, member C2(Slc35c2)
ENSMUSG00000024121	ATP6V0C	Mus musculus	ATPase, H+ transporting, lysosomal V0 subunit C(Atp6v0c)
ENSMUSG00000024122	PDPK1	Mus musculus	3-phosphoinositide dependent protein kinase 1(Pdpk1)
ENSMUSG00000021209	PPP4R4	Mus musculus	protein phosphatase 4, regulatory subunit 4(Ppp4r4)
ENSMUSG00000024124	Prss30	Mus musculus	protease, serine 30(Prss30)
ENSMUSG00000037012	HK1	Mus musculus	hexokinase 1(Hk1)
ENSMUSG00000071252	2210408I21Rik	Mus musculus	RIKEN cDNA 2210408I21 gene(2210408I21Rik)
ENSMUSG00000032743	D430042O09Rik	Mus musculus	RIKEN cDNA D430042O09 gene(D430042O09Rik)
ENSMUSG00000036887	C1QA	Mus musculus	complement component 1, q subcomponent, alpha polypeptide(C1qa)
ENSMUSG00000036057	PTPN23	Mus musculus	protein tyrosine phosphatase, non-receptor type 23(Ptpn23)
ENSMUSG00000006235	EPOR	Mus musculus	erythropoietin receptor(Epor)
ENSMUSG00000021235	COQ6	Mus musculus	coenzyme Q6 monooxygenase(Coq6)
ENSMUSG00000046922	GPR6	Mus musculus	G protein-coupled receptor 6(Gpr6)
ENSMUSG00000075297	H60b	Mus musculus	histocompatibility 60b(H60b)
ENSMUSG00000091002	TCERG1L	Mus musculus	transcription elongation regulator 1-like(Tcerg1l)
ENSMUSG00000055401	FBXO6	Mus musculus	F-box protein 6(Fbxo6)
ENSMUSG00000060279	AP2A1	Mus musculus	adaptor-related protein complex 2, alpha 1 subunit(Ap2a1)
ENSMUSG00000032363	ADAMTS7	Mus musculus	a disintegrin-like and metallopeptidase (reprolysin type) with thrombospondin type 1 motif, 7(Adamts7)
ENSMUSG00000042269	FAM92B	Mus musculus	family with sequence similarity 92, member B(Fam92b)
ENSMUSG00000089857	Zfp882	Mus musculus	zinc finger protein 882(Zfp882)
ENSMUSG00000040018	Cox15	Mus musculus	cytochrome c oxidase assembly protein 15(Cox15)
ENSMUSG00000041084	OSTC	Mus musculus	oligosaccharyltransferase complex subunit (non-catalytic)(Ostc)
ENSMUSG00000024134	SIX2	Mus musculus	sine oculis-related homeobox 2(Six2)
ENSMUSG00000034730	ADGRB1	Mus musculus	adhesion G protein-coupled receptor B1(Adgrb1)
ENSMUSG00000024535	SNX24	Mus musculus	sorting nexing 24(Snx24)
ENSMUSG00000033805	EPHX4	Mus musculus	epoxide hydrolase 4(Ephx4)
ENSMUSG00000024530	SLMO1	Mus musculus	slowmo homolog 1 (Drosophila)(Slmo1)
ENSMUSG00000033053	1700028P14Rik	Mus musculus	RIKEN cDNA 1700028P14 gene(1700028P14Rik)
ENSMUSG00000032350	GCLC	Mus musculus	glutamate-cysteine ligase, catalytic subunit(Gclc)
ENSMUSG00000050382	KIF7	Mus musculus	kinesin family member 7(Kif7)
ENSMUSG00000024143	RHOQ	Mus musculus	ras homolog family member Q(Rhoq)
ENSMUSG00000051314	FFAR2	Mus musculus	free fatty acid receptor 2(Ffar2)
ENSMUSG00000017686	RHOT1	Mus musculus	ras homolog family member T1(Rhot1)
ENSMUSG00000071669	SNX29	Mus musculus	sorting nexin 29(Snx29)
ENSMUSG00000021127	ZFP36L1	Mus musculus	zinc finger protein 36, C3H type-like 1(Zfp36l1)
ENSMUSG00000054727	1700013H16Rik	Mus musculus	RIKEN cDNA 1700013H16 gene(1700013H16Rik)
ENSMUSG00000045812	Olfr984	Mus musculus	olfactory receptor 984(Olfr984)
ENSMUSG00000064030	PYM1	Mus musculus	PYM homolog 1, exon junction complex associated factor(Pym1)
ENSMUSG00000049420	TMEM200A	Mus musculus	transmembrane protein 200A(Tmem200a)
ENSMUSG00000026739	BMI1	Mus musculus	Bmi1 polycomb ring finger oncogene(Bmi1)
ENSMUSG00000050714	ZBTB26	Mus musculus	zinc finger and BTB domain containing 26(Zbtb26)
ENSMUSG00000022780	mfi2	Mus musculus	antigen p97 (melanoma associated) identified by monoclonal antibodies 133.2 and 96.5(Mfi2)
ENSMUSG00000037058	PAIP2	Mus musculus	polyadenylate-binding protein-interacting protein 2(Paip2)
ENSMUSG00000090841	MYL6	Mus musculus	myosin, light polypeptide 6, alkali, smooth muscle and non-muscle(Myl6)
ENSMUSG00000027868	TBX15	Mus musculus	T-box 15(Tbx15)
ENSMUSG00000015966	IL17RB	Mus musculus	interleukin 17 receptor B(Il17rb)
ENSMUSG00000042197	Zfp451	Mus musculus	zinc finger protein 451(Zfp451)
ENSMUSG00000027111	ITGA6	Mus musculus	integrin alpha 6(Itga6)
ENSMUSG00000049439	CYP20A1	Mus musculus	cytochrome P450, family 20, subfamily a, polypeptide 1(Cyp20a1)
ENSMUSG00000061393	ACVR2B	Mus musculus	activin receptor IIB(Acvr2b)
ENSMUSG00000030120	MLF2	Mus musculus	myeloid leukemia factor 2(Mlf2)
ENSMUSG00000030123	PLXND1	Mus musculus	plexin D1(Plxnd1)
ENSMUSG00000022770	DLG1	Mus musculus	discs, large homolog 1 (Drosophila)(Dlg1)
ENSMUSG00000032268	TMPRSS5	Mus musculus	transmembrane protease, serine 5 (spinesin)(Tmprss5)
ENSMUSG00000032265	FAM46A	Mus musculus	family with sequence similarity 46, member A(Fam46a)
ENSMUSG00000077450	RAB11B	Mus musculus	RAB11B, member RAS oncogene family(Rab11b)
ENSMUSG00000015971	ACTR8	Mus musculus	ARP8 actin-related protein 8(Actr8)
ENSMUSG00000031657	HEATR3	Mus musculus	HEAT repeat containing 3(Heatr3)
ENSMUSG00000030127	COPS7A	Mus musculus	COP9 signalosome subunit 7A(Cops7a)
ENSMUSG00000048376	F2R	Mus musculus	coagulation factor II (thrombin) receptor(F2r)
ENSMUSG00000036941	ELAC1	Mus musculus	elaC ribonuclease Z 1(Elac1)
ENSMUSG00000036940	KDM1A	Mus musculus	lysine (K)-specific demethylase 1A(Kdm1a)
ENSMUSG00000048371	PDP2	Mus musculus	pyruvate dehyrogenase phosphatase catalytic subunit 2(Pdp2)
ENSMUSG00000058743	KCNJ14	Mus musculus	potassium inwardly-rectifying channel, subfamily J, member 14(Kcnj14)
ENSMUSG00000036955	kif1bp	Mus musculus	KIF1 binding protein(Kif1bp)
ENSMUSG00000061360	PHF5A	Mus musculus	PHD finger protein 5A(Phf5a)
ENSMUSG00000044303	CDKN2A	Mus musculus	cyclin-dependent kinase inhibitor 2A(Cdkn2a)
ENSMUSG00000091476	Gm16432	Mus musculus	predicted gene 16432(Gm16432)
ENSMUSG00000090862	RPS13	Mus musculus	ribosomal protein S13(Rps13)
ENSMUSG00000021149	GTPBP4	Mus musculus	GTP binding protein 4(Gtpbp4)
ENSMUSG00000037031	tspan15	Mus musculus	tetraspanin 15(Tspan15)
ENSMUSG00000049404	RARRES1	Mus musculus	retinoic acid receptor responder (tazarotene induced) 1(Rarres1)
ENSMUSG00000058740	kcnt1	Mus musculus	potassium channel, subfamily T, member 1(Kcnt1)
ENSMUSG00000035314	GDPD5	Mus musculus	glycerophosphodiester phosphodiesterase domain containing 5(Gdpd5)
ENSMUSG00000024619	CDX1	Mus musculus	caudal type homeobox 1(Cdx1)
ENSMUSG00000030134	RASGEF1A	Mus musculus	RasGEF domain family, member 1A(Rasgef1a)
ENSMUSG00000035311	GNPTAB	Mus musculus	N-acetylglucosamine-1-phosphate transferase, alpha and beta subunits(Gnptab)
ENSMUSG00000035310	LIN54	Mus musculus	lin-54 homolog (C. elegans)(Lin54)
ENSMUSG00000004113	CACNA1B	Mus musculus	calcium channel, voltage-dependent, N type, alpha 1B subunit(Cacna1b)
ENSMUSG00000031666	RBL2	Mus musculus	retinoblastoma-like 2(Rbl2)
ENSMUSG00000027886	1700013F07Rik	Mus musculus	RIKEN cDNA 1700013F07 gene(1700013F07Rik)
ENSMUSG00000069565	DAZAP1	Mus musculus	DAZ associated protein 1(Dazap1)
ENSMUSG00000021143	PACS2	Mus musculus	phosphofurin acidic cluster sorting protein 2(Pacs2)
ENSMUSG00000049411	TMEM241	Mus musculus	transmembrane protein 241(Tmem241)
ENSMUSG00000032280	TLE3	Mus musculus	transducin-like enhancer of split 3(Tle3)
ENSMUSG00000041165	SPEM1	Mus musculus	sperm maturation 1(Spem1)
ENSMUSG00000032289	THSD4	Mus musculus	thrombospondin, type I, domain containing 4(Thsd4)
ENSMUSG00000037552	PLEKHG2	Mus musculus	pleckstrin homology domain containing, family G (with RhoGef domain) member 2(Plekhg2)
ENSMUSG00000037025	FOXA2	Mus musculus	forkhead box A2(Foxa2)
ENSMUSG00000022791	TNK2	Mus musculus	tyrosine kinase, non-receptor, 2(Tnk2)
ENSMUSG00000032285	DNAJA4	Mus musculus	DnaJ heat shock protein family (Hsp40) member A4(Dnaja4)
ENSMUSG00000030142	CLEC4E	Mus musculus	C-type lectin domain family 4, member e(Clec4e)
ENSMUSG00000050747	TRIM15	Mus musculus	tripartite motif-containing 15(Trim15)
ENSMUSG00000050335	LGALS3	Mus musculus	lectin, galactose binding, soluble 3(Lgals3)
ENSMUSG00000044702	PALB2	Mus musculus	partner and localizer of BRCA2(Palb2)
ENSMUSG00000026766	MMADHC	Mus musculus	methylmalonic aciduria (cobalamin deficiency) cblD type, with homocystinuria(Mmadhc)
ENSMUSG00000020621	rdh14	Mus musculus	retinol dehydrogenase 14 (all-trans and 9-cis)(Rdh14)
ENSMUSG00000027893	AHCYL1	Mus musculus	S-adenosylhomocysteine hydrolase-like 1(Ahcyl1)
ENSMUSG00000044709	GEMIN7	Mus musculus	gem (nuclear organelle) associated protein 7(Gemin7)
ENSMUSG00000047227	Gm527	Mus musculus	predicted gene 527(Gm527)
ENSMUSG00000021156	ZMYND11	Mus musculus	zinc finger, MYND domain containing 11(Zmynd11)
ENSMUSG00000014859	E2F4	Mus musculus	E2F transcription factor 4(E2f4)
ENSMUSG00000030156	CD69	Mus musculus	CD69 antigen(Cd69)
ENSMUSG00000029275	GFI1	Mus musculus	growth factor independent 1(Gfi1)
ENSMUSG00000021763	BC067074	Mus musculus	cDNA sequence BC067074(BC067074)
ENSMUSG00000028677	RNF220	Mus musculus	ring finger protein 220(Rnf220)
ENSMUSG00000041153	OSGIN2	Mus musculus	oxidative stress induced growth inhibitor family member 2(Osgin2)
ENSMUSG00000054764	MTNR1A	Mus musculus	melatonin receptor 1A(Mtnr1a)
ENSMUSG00000015094	NPDC1	Mus musculus	neural proliferation, differentiation and control 1(Npdc1)
ENSMUSG00000028284	MAP3K7	Mus musculus	mitogen-activated protein kinase kinase kinase 7(Map3k7)
ENSMUSG00000028282	CASP8AP2	Mus musculus	caspase 8 associated protein 2(Casp8ap2)
ENSMUSG00000041920	SLC16A6	Mus musculus	solute carrier family 16 (monocarboxylic acid transporters), member 6(Slc16a6)
ENSMUSG00000031608	GALNT7	Mus musculus	UDP-N-acetyl-alpha-D-galactosamine: polypeptide N-acetylgalactosaminyltransferase 7(Galnt7)
ENSMUSG00000041923	NOL4	Mus musculus	nucleolar protein 4(Nol4)
ENSMUSG00000020634	UBXN2A	Mus musculus	UBX domain protein 2A(Ubxn2a)
ENSMUSG00000031605	KLHL2	Mus musculus	kelch-like 2, Mayven(Klhl2)
ENSMUSG00000044715	GSKIP	Mus musculus	GSK3B interacting protein(Gskip)
ENSMUSG00000041926	RNPEP	Mus musculus	arginyl aminopeptidase (aminopeptidase B)(Rnpep)
ENSMUSG00000022744	CLDND1	Mus musculus	claudin domain containing 1(Cldnd1)
ENSMUSG00000017204	GSDMA	Mus musculus	gasdermin A(Gsdma)
ENSMUSG00000021768	DUSP13	Mus musculus	dual specificity phosphatase 13(Dusp13)
ENSMUSG00000020635	FKBP1B	Mus musculus	FK506 binding protein 1b(Fkbp1b)
ENSMUSG00000020636	ALLC	Mus musculus	allantoicase(Allc)
ENSMUSG00000004562	ARHGEF40	Mus musculus	Rho guanine nucleotide exchange factor (GEF) 40(Arhgef40)
ENSMUSG00000030161	GABARAPL1	Mus musculus	gamma-aminobutyric acid (GABA) A receptor-associated protein-like 1(Gabarapl1)
ENSMUSG00000035325	SEC31A	Mus musculus	Sec31 homolog A (S. cerevisiae)(Sec31a)
ENSMUSG00000028684	UROD	Mus musculus	uroporphyrinogen decarboxylase(Urod)
ENSMUSG00000001763	TSPAN33	Mus musculus	tetraspanin 33(Tspan33)
ENSMUSG00000036902	NETO2	Mus musculus	neuropilin (NRP) and tolloid (TLL)-like 2(Neto2)
ENSMUSG00000037085	TRMT12	Mus musculus	tRNA methyltranferase 12(Trmt12)
ENSMUSG00000015092	EDF1	Mus musculus	endothelial differentiation-related factor 1(Edf1)
ENSMUSG00000015085	ENTPD2	Mus musculus	ectonucleoside triphosphate diphosphohydrolase 2(Entpd2)
ENSMUSG00000021175	CDCA7L	Mus musculus	cell division cycle associated 7 like(Cdca7l)
ENSMUSG00000031201	BRCC3	Mus musculus	BRCA1/BRCA2-containing complex, subunit 3(Brcc3)
ENSMUSG00000034681	RNPS1	Mus musculus	ribonucleic acid binding protein S1(Rnps1)
ENSMUSG00000073702	RPL31	Mus musculus	ribosomal protein L31(Rpl31)
ENSMUSG00000028274	RNGTT	Mus musculus	RNA guanylyltransferase and 5'-phosphatase(Rngtt)
ENSMUSG00000055884	fancm	Mus musculus	Fanconi anemia, complementation group M(Fancm)
ENSMUSG00000034685	FAM171A2	Mus musculus	family with sequence similarity 171, member A2(Fam171a2)
ENSMUSG00000048337	NPY4R	Mus musculus	neuropeptide Y receptor Y4(Npy4r)
ENSMUSG00000004952	rasa4	Mus musculus	RAS p21 protein activator 4(Rasa4)
ENSMUSG00000047284	neurl4	Mus musculus	neuralized E3 ubiquitin protein ligase 4(Neurl4)
ENSMUSG00000020646	MBOAT2	Mus musculus	membrane bound O-acyltransferase domain containing 2(Mboat2)
ENSMUSG00000021171	ESYT2	Mus musculus	extended synaptotagmin-like protein 2(Esyt2)
ENSMUSG00000029270	FAM69A	Mus musculus	family with sequence similarity 69, member A(Fam69a)
ENSMUSG00000041939	MVK	Mus musculus	mevalonate kinase(Mvk)
ENSMUSG00000073705	apitd1	Mus musculus	apoptosis-inducing, TAF9-like domain 1(Apitd1)
ENSMUSG00000026718	STAM	Mus musculus	signal transducing adaptor molecule (SH3 domain and ITAM motif) 1(Stam)
ENSMUSG00000002957	AP2A2	Mus musculus	adaptor-related protein complex 2, alpha 2 subunit(Ap2a2)
ENSMUSG00000028693	NASP	Mus musculus	nuclear autoantigenic sperm protein (histone-binding)(Nasp)
ENSMUSG00000026715	SERPINC1	Mus musculus	serine (or cysteine) peptidase inhibitor, clade C (antithrombin), member 1(Serpinc1)
ENSMUSG00000022762	NCAM2	Mus musculus	neural cell adhesion molecule 2(Ncam2)
ENSMUSG00000035354	UVRAG	Mus musculus	UV radiation resistance associated gene(Uvrag)
ENSMUSG00000037072	sep15	Mus musculus	selenoprotein 15(Sep15)
ENSMUSG00000027180	FBXO3	Mus musculus	F-box protein 3(Fbxo3)
ENSMUSG00000024991	EIF3A	Mus musculus	eukaryotic translation initiation factor 3, subunit A(Eif3a)
ENSMUSG00000001794	CAPNS1	Mus musculus	calpain, small subunit 1(Capns1)
ENSMUSG00000021188	TRIP11	Mus musculus	thyroid hormone receptor interactor 11(Trip11)
ENSMUSG00000021189	ATXN3	Mus musculus	ataxin 3(Atxn3)
ENSMUSG00000027177	HIPK3	Mus musculus	homeodomain interacting protein kinase 3(Hipk3)
ENSMUSG00000044345	MARVELD1	Mus musculus	MARVEL (membrane-associating) domain containing 1(Marveld1)
ENSMUSG00000021182	CCDC88C	Mus musculus	coiled-coil domain containing 88C(Ccdc88c)
ENSMUSG00000031622	SIN3B	Mus musculus	transcriptional regulator, SIN3B (yeast)(Sin3b)
ENSMUSG00000003458	NCSTN	Mus musculus	nicastrin(Ncstn)
ENSMUSG00000022769	SDF2L1	Mus musculus	stromal cell-derived factor 2-like 1(Sdf2l1)
ENSMUSG00000020661	DNMT3A	Mus musculus	DNA methyltransferase 3A(Dnmt3a)
ENSMUSG00000070730	RMDN3	Mus musculus	regulator of microtubule dynamics 3(Rmdn3)
ENSMUSG00000021792	FAM213A	Mus musculus	family with sequence similarity 213, member A(Fam213a)
ENSMUSG00000015957	WNT11	Mus musculus	wingless-type MMTV integration site family, member 11(Wnt11)
ENSMUSG00000067786	NNAT	Mus musculus	neuronatin(Nnat)
ENSMUSG00000026728	VIM	Mus musculus	vimentin(Vim)
ENSMUSG00000022751	NIT2	Mus musculus	nitrilase family, member 2(Nit2)
ENSMUSG00000035342	LZTS2	Mus musculus	leucine zipper, putative tumor suppressor 2(Lzts2)
ENSMUSG00000037062	SH3GLB1	Mus musculus	SH3-domain GRB2-like B1 (endophilin)(Sh3glb1)
ENSMUSG00000050700	EMILIN3	Mus musculus	elastin microfibril interfacer 3(Emilin3)
ENSMUSG00000001786	FBXO7	Mus musculus	F-box protein 7(Fbxo7)
ENSMUSG00000029248	THEGL	Mus musculus	theg spermatid protein like(Thegl)
ENSMUSG00000045034	ANKRD34B	Mus musculus	ankyrin repeat domain 34B(Ankrd34b)
ENSMUSG00000028294	CFAP206	Mus musculus	cilia and flagella associated protein 206(Cfap206)
ENSMUSG00000047264	Zfp358	Mus musculus	zinc finger protein 358(Zfp358)
ENSMUSG00000056174	COL8A2	Mus musculus	collagen, type VIII, alpha 2(Col8a2)
ENSMUSG00000021192	GOLGA5	Mus musculus	golgi autoantigen, golgin subfamily a, 5(Golga5)
ENSMUSG00000031636	PDLIM3	Mus musculus	PDZ and LIM domain 3(Pdlim3)
ENSMUSG00000021720	RNF180	Mus musculus	ring finger protein 180(Rnf180)
ENSMUSG00000022701	CCDC191	Mus musculus	coiled-coil domain containing 191(Ccdc191)
ENSMUSG00000020070	RUFY2	Mus musculus	RUN and FYVE domain-containing 2(Rufy2)
ENSMUSG00000029617	CCZ1	Mus musculus	CCZ1 vacuolar protein trafficking and biogenesis associated(Ccz1)
ENSMUSG00000000740	RPL13	Mus musculus	ribosomal protein L13(Rpl13)
ENSMUSG00000041115	IQSEC2	Mus musculus	IQ motif and Sec7 domain 2(Iqsec2)
ENSMUSG00000008090	FGFRL1	Mus musculus	fibroblast growth factor receptor-like 1(Fgfrl1)
ENSMUSG00000056167	CNOT10	Mus musculus	CCR4-NOT transcription complex, subunit 10(Cnot10)
ENSMUSG00000018770	ATP5G3	Mus musculus	ATP synthase, H+ transporting, mitochondrial F0 complex, subunit C3 (subunit 9)(Atp5g3)
ENSMUSG00000020078	VPS26A	Mus musculus	VPS26 retromer complex component A(Vps26a)
ENSMUSG00000015053	GATA2	Mus musculus	GATA binding protein 2(Gata2)
ENSMUSG00000028245	NSMAF	Mus musculus	neutral sphingomyelinase (N-SMase) activation associated factor(Nsmaf)
ENSMUSG00000046618	olfml2a	Mus musculus	olfactomedin-like 2A(Olfml2a)
ENSMUSG00000020672	SNTG2	Mus musculus	syntrophin, gamma 2(Sntg2)
ENSMUSG00000029602	RASAL1	Mus musculus	RAS protein activator like 1 (GAP1 like)(Rasal1)
ENSMUSG00000053129	GSX1	Mus musculus	GS homeobox 1(Gsx1)
ENSMUSG00000020687	CDC27	Mus musculus	cell division cycle 27(Cdc27)
ENSMUSG00000028236	SDR16C5	Mus musculus	short chain dehydrogenase/reductase family 16C, member 5(Sdr16c5)
ENSMUSG00000007783	CPT1C	Mus musculus	carnitine palmitoyltransferase 1c(Cpt1c)
ENSMUSG00000001334	FNDC5	Mus musculus	fibronectin type III domain containing 5(Fndc5)
ENSMUSG00000020086	H2AFY2	Mus musculus	H2A histone family, member Y2(H2afy2)
ENSMUSG00000057286	st6galnac2	Mus musculus	ST6 (alpha-N-acetyl-neuraminyl-2,3-beta-galactosyl-1,3)-N-acetylgalactosaminide alpha-2,6-sialyltransferase 2(St6galnac2)
ENSMUSG00000038180	SPAG4	Mus musculus	sperm associated antigen 4(Spag4)
ENSMUSG00000027184	CAPRIN1	Mus musculus	cell cycle associated protein 1(Caprin1)
ENSMUSG00000020085	AIFM2	Mus musculus	apoptosis-inducing factor, mitochondrion-associated 2(Aifm2)
ENSMUSG00000038178	SLC43A2	Mus musculus	solute carrier family 43, member 2(Slc43a2)
ENSMUSG00000025289	PRDX4	Mus musculus	peroxiredoxin 4(Prdx4)
ENSMUSG00000038172	TTC39B	Mus musculus	tetratricopeptide repeat domain 39B(Ttc39b)
ENSMUSG00000094626	CECR6	Mus musculus	cat eye syndrome chromosome region, candidate 6(Cecr6)
ENSMUSG00000027593	RALY	Mus musculus	hnRNP-associated with lethal yellow(Raly)
ENSMUSG00000045440	INSM2	Mus musculus	insulinoma-associated 2(Insm2)
ENSMUSG00000029221	SLC30A9	Mus musculus	solute carrier family 30 (zinc transporter), member 9(Slc30a9)
ENSMUSG00000020682	mmp28	Mus musculus	matrix metallopeptidase 28 (epilysin)(Mmp28)
ENSMUSG00000027596	A	Mus musculus	nonagouti(a)
ENSMUSG00000000738	SPG7	Mus musculus	spastic paraplegia 7 homolog (human)(Spg7)
ENSMUSG00000020092	PALD1	Mus musculus	phosphatase domain containing, paladin 1(Pald1)
ENSMUSG00000026005	RPE	Mus musculus	ribulose-5-phosphate-3-epimerase(Rpe)
ENSMUSG00000020697	LIG3	Mus musculus	ligase III, DNA, ATP-dependent(Lig3)
ENSMUSG00000029632	NDUFA4	Mus musculus	NADH dehydrogenase (ubiquinone) 1 alpha subcomplex, 4(Ndufa4)
ENSMUSG00000065990	AURKAIP1	Mus musculus	aurora kinase A interacting protein 1(Aurkaip1)
ENSMUSG00000020097	SGPL1	Mus musculus	sphingosine phosphate lyase 1(Sgpl1)
ENSMUSG00000035392	DENND1A	Mus musculus	DENN/MADD domain containing 1A(Dennd1a)
ENSMUSG00000035390	BRSK1	Mus musculus	BR serine/threonine kinase 1(Brsk1)
ENSMUSG00000074472	Zfp872	Mus musculus	zinc finger protein 872(Zfp872)
ENSMUSG00000012640	Zfp715	Mus musculus	zinc finger protein 715(Zfp715)
ENSMUSG00000041515	IRF8	Mus musculus	interferon regulatory factor 8(Irf8)
ENSMUSG00000018363	SMURF2	Mus musculus	SMAD specific E3 ubiquitin protein ligase 2(Smurf2)
ENSMUSG00000008859	RALA	Mus musculus	v-ral simian leukemia viral oncogene A (ras related)(Rala)
ENSMUSG00000020694	TLK2	Mus musculus	tousled-like kinase 2 (Arabidopsis)(Tlk2)
ENSMUSG00000034269	SETD5	Mus musculus	SET domain containing 5(Setd5)
ENSMUSG00000056501	CEBPB	Mus musculus	CCAAT/enhancer binding protein (C/EBP), beta(Cebpb)
ENSMUSG00000053111	fank1	Mus musculus	fibronectin type 3 and ankyrin repeat domains 1(Fank1)
ENSMUSG00000022710	USP7	Mus musculus	ubiquitin specific peptidase 7(Usp7)
ENSMUSG00000039501	ZNFX1	Mus musculus	zinc finger, NFX1-type containing 1(Znfx1)
ENSMUSG00000029625	CPSF4	Mus musculus	cleavage and polyadenylation specific factor 4(Cpsf4)
ENSMUSG00000029621	ARPC1A	Mus musculus	actin related protein 2/3 complex, subunit 1A(Arpc1a)
ENSMUSG00000033530	TTC7B	Mus musculus	tetratricopeptide repeat domain 7B(Ttc7b)
ENSMUSG00000049882	VCPKMT	Mus musculus	valosin containing protein lysine (K) methyltransferase(Vcpkmt)
ENSMUSG00000041506	RRP9	Mus musculus	RRP9, small subunit (SSU) processome component, homolog (yeast)(Rrp9)
ENSMUSG00000109523	GDF1	Mus musculus	growth differentiation factor 1(Gdf1)
ENSMUSG00000039509	NUP133	Mus musculus	nucleoporin 133(Nup133)
ENSMUSG00000044783	HJURP	Mus musculus	Holliday junction recognition protein(Hjurp)
ENSMUSG00000056121	FEZ2	Mus musculus	fasciculation and elongation protein zeta 2 (zygin II)(Fez2)
ENSMUSG00000026771	SPOPL	Mus musculus	speckle-type POZ protein-like(Spopl)
ENSMUSG00000037134	PRMT9	Mus musculus	protein arginine methyltransferase 9(Prmt9)
ENSMUSG00000033542	ARHGEF5	Mus musculus	Rho guanine nucleotide exchange factor (GEF) 5(Arhgef5)
ENSMUSG00000034205	LOXL2	Mus musculus	lysyl oxidase-like 2(Loxl2)
ENSMUSG00000028207	ASPH	Mus musculus	aspartate-beta-hydroxylase(Asph)
ENSMUSG00000044795	CYB5D1	Mus musculus	cytochrome b5 domain containing 1(Cyb5d1)
ENSMUSG00000033545	ZNRF1	Mus musculus	zinc and ring finger 1(Znrf1)
ENSMUSG00000059810	RGS3	Mus musculus	regulator of G-protein signaling 3(Rgs3)
ENSMUSG00000038141	Tmem181a	Mus musculus	transmembrane protein 181A(Tmem181a)
ENSMUSG00000056962	JMJD6	Mus musculus	jumonji domain containing 6(Jmjd6)
ENSMUSG00000063870	CHD4	Mus musculus	chromodomain helicase DNA binding protein 4(Chd4)
ENSMUSG00000009739	POU6F1	Mus musculus	POU domain, class 6, transcription factor 1(Pou6f1)
ENSMUSG00000014402	TSG101	Mus musculus	tumor susceptibility gene 101(Tsg101)
ENSMUSG00000031697	ORC6	Mus musculus	origin recognition complex, subunit 6(Orc6)
ENSMUSG00000067724	GBX1	Mus musculus	gastrulation brain homeobox 1(Gbx1)
ENSMUSG00000027833	SHOX2	Mus musculus	short stature homeobox 2(Shox2)
ENSMUSG00000000776	POLR3D	Mus musculus	polymerase (RNA) III (DNA directed) polypeptide D(Polr3d)
ENSMUSG00000075502	KBTBD6	Mus musculus	kelch repeat and BTB (POZ) domain containing 6(Kbtbd6)
ENSMUSG00000023861	MPC1	Mus musculus	mitochondrial pyruvate carrier 1(Mpc1)
ENSMUSG00000055805	FMNL1	Mus musculus	formin-like 1(Fmnl1)
ENSMUSG00000008036	AP2S1	Mus musculus	adaptor-related protein complex 2, sigma 1 subunit(Ap2s1)
ENSMUSG00000026792	LRSAM1	Mus musculus	leucine rich repeat and sterile alpha motif containing 1(Lrsam1)
ENSMUSG00000037112	SIK2	Mus musculus	salt inducible kinase 2(Sik2)
ENSMUSG00000020057	DRAM1	Mus musculus	DNA-damage regulated autophagy modulator 1(Dram1)
ENSMUSG00000007777	0610009B22Rik	Mus musculus	RIKEN cDNA 0610009B22 gene(0610009B22Rik)
ENSMUSG00000053963	STUM	Mus musculus	mechanosensory transduction mediator(Stum)
ENSMUSG00000009741	UBP1	Mus musculus	upstream binding protein 1(Ubp1)
ENSMUSG00000026798	COQ4	Mus musculus	coenzyme Q4(Coq4)
ENSMUSG00000039556	PPP1R3F	Mus musculus	protein phosphatase 1, regulatory (inhibitor) subunit 3F(Ppp1r3f)
ENSMUSG00000037509	ARHGEF4	Mus musculus	Rho guanine nucleotide exchange factor (GEF) 4(Arhgef4)
ENSMUSG00000026796	FAM129B	Mus musculus	family with sequence similarity 129, member B(Fam129b)
ENSMUSG00000034226	rhov	Mus musculus	ras homolog family member V(Rhov)
ENSMUSG00000025702	MARCH8	Mus musculus	membrane-associated ring finger (C3HC4) 8(March8)
ENSMUSG00000027849	SYT6	Mus musculus	synaptotagmin VI(Syt6)
ENSMUSG00000042671	RGS8	Mus musculus	regulator of G-protein signaling 8(Rgs8)
ENSMUSG00000107252	Gm5767	Mus musculus	predicted gene 5767(Gm5767)
ENSMUSG00000021714	CENPK	Mus musculus	centromere protein K(Cenpk)
ENSMUSG00000030109	SLC6A12	Mus musculus	solute carrier family 6 (neurotransmitter transporter, betaine/GABA), member 12(Slc6a12)
ENSMUSG00000000759	TUBGCP3	Mus musculus	tubulin, gamma complex associated protein 3(Tubgcp3)
ENSMUSG00000025716	MYO3A	Mus musculus	myosin IIIA(Myo3a)
ENSMUSG00000023886	SMOC2	Mus musculus	SPARC related modular calcium binding 2(Smoc2)
ENSMUSG00000061751	KALRN	Mus musculus	kalirin, RhoGEF kinase(Kalrn)
ENSMUSG00000027859	NGF	Mus musculus	nerve growth factor(Ngf)
ENSMUSG00000042680	GAREM1	Mus musculus	GRB2 associated regulator of MAPK1 subtype 1(Garem1)
ENSMUSG00000059820	AU019823	Mus musculus	expressed sequence AU019823(AU019823)
ENSMUSG00000055826	Tescl	Mus musculus	tescalcin-like(Tescl)
ENSMUSG00000042682	selk	Mus musculus	selenoprotein K(Selk)
ENSMUSG00000033579	FA2H	Mus musculus	fatty acid 2-hydroxylase(Fa2h)
ENSMUSG00000030649	ANAPC15	Mus musculus	anaphase prompoting complex C subunit 15(Anapc15)
ENSMUSG00000018196	GLRX2	Mus musculus	glutaredoxin 2 (thioltransferase)(Glrx2)
ENSMUSG00000063382	BCL9L	Mus musculus	B cell CLL/lymphoma 9-like(Bcl9l)
ENSMUSG00000072889	NFXL1	Mus musculus	nuclear transcription factor, X-box binding-like 1(Nfxl1)
ENSMUSG00000034826	NUP54	Mus musculus	nucleoporin 54(Nup54)
ENSMUSG00000029581	FSCN1	Mus musculus	fascin actin-bundling protein 1(Fscn1)
ENSMUSG00000020260	POFUT2	Mus musculus	protein O-fucosyltransferase 2(Pofut2)
ENSMUSG00000029580	ACTB	Mus musculus	actin, beta(Actb)
ENSMUSG00000020261	SLC36A1	Mus musculus	solute carrier family 36 (proton/amino acid symporter), member 1(Slc36a1)
ENSMUSG00000028707	DMBX1	Mus musculus	diencephalon/mesencephalon homeobox 1(Dmbx1)
ENSMUSG00000026197	ZFAND2B	Mus musculus	zinc finger, AN1 type domain 2B(Zfand2b)
ENSMUSG00000020263	appl2	Mus musculus	adaptor protein, phosphotyrosine interaction, PH domain and leucine zipper containing 2(Appl2)
ENSMUSG00000035953	TMEM55B	Mus musculus	transmembrane protein 55b(Tmem55b)
ENSMUSG00000009394	SYN2	Mus musculus	synapsin II(Syn2)
ENSMUSG00000079579	Gm6760	Mus musculus	predicted gene 6760(Gm6760)
ENSMUSG00000059474	MBTD1	Mus musculus	mbt domain containing 1(Mbtd1)
ENSMUSG00000020267	HINT1	Mus musculus	histidine triad nucleotide binding protein 1(Hint1)
ENSMUSG00000001510	DLX3	Mus musculus	distal-less homeobox 3(Dlx3)
ENSMUSG00000060538	TMEM219	Mus musculus	transmembrane protein 219(Tmem219)
ENSMUSG00000020905	USP43	Mus musculus	ubiquitin specific peptidase 43(Usp43)
ENSMUSG00000041477	DCP1B	Mus musculus	decapping mRNA 1B(Dcp1b)
ENSMUSG00000034818	CELF5	Mus musculus	CUGBP, Elav-like family member 5(Celf5)
ENSMUSG00000072872	RYBP	Mus musculus	RING1 and YY1 binding protein(Rybp)
ENSMUSG00000025504	EPS8L2	Mus musculus	EPS8-like 2(Eps8l2)
ENSMUSG00000030638	SH3GL3	Mus musculus	SH3-domain GRB2-like 3(Sh3gl3)
ENSMUSG00000027641	RBL1	Mus musculus	retinoblastoma-like 1 (p107)(Rbl1)
ENSMUSG00000055912	TMEM150A	Mus musculus	transmembrane protein 150A(Tmem150a)
ENSMUSG00000048668	RHNO1	Mus musculus	RAD9-HUS1-RAD1 interacting nuclear orphan 1(Rhno1)
ENSMUSG00000027646	SRC	Mus musculus	Rous sarcoma oncogene(Src)
ENSMUSG00000020900	MYH10	Mus musculus	myosin, heavy polypeptide 10, non-muscle(Myh10)
ENSMUSG00000022394	L3MBTL2	Mus musculus	l(3)mbt-like 2 (Drosophila)(L3mbtl2)
ENSMUSG00000072487	MROH5	Mus musculus	maestro heat-like repeat family member 5(Mroh5)
ENSMUSG00000029596	SDSL	Mus musculus	serine dehydratase-like(Sdsl)
ENSMUSG00000037278	TMEM97	Mus musculus	transmembrane protein 97(Tmem97)
ENSMUSG00000022391	RANGAP1	Mus musculus	RAN GTPase activating protein 1(Rangap1)
ENSMUSG00000007850	HNRNPH1	Mus musculus	heterogeneous nuclear ribonucleoprotein H1(Hnrnph1)
ENSMUSG00000039298	CDK5RAP2	Mus musculus	CDK5 regulatory subunit associated protein 2(Cdk5rap2)
ENSMUSG00000038671	ARFRP1	Mus musculus	ADP-ribosylation factor related protein 1(Arfrp1)
ENSMUSG00000056596	TRNP1	Mus musculus	TMF1-regulated nuclear protein 1(Trnp1)
ENSMUSG00000055116	ARNTL	Mus musculus	aryl hydrocarbon receptor nuclear translocator-like(Arntl)
ENSMUSG00000019891	DCBLD1	Mus musculus	discoidin, CUB and LCCL domain containing 1(Dcbld1)
ENSMUSG00000027630	TBL1XR1	Mus musculus	transducin (beta)-like 1X-linked receptor 1(Tbl1xr1)
ENSMUSG00000034801	SOS2	Mus musculus	son of sevenless homolog 2 (Drosophila)(Sos2)
ENSMUSG00000006784	TTC25	Mus musculus	tetratricopeptide repeat domain 25(Ttc25)
ENSMUSG00000020248	NFYB	Mus musculus	nuclear transcription factor-Y beta(Nfyb)
ENSMUSG00000035930	CHST4	Mus musculus	carbohydrate (chondroitin 6/keratan) sulfotransferase 4(Chst4)
ENSMUSG00000040322	SLC25A24	Mus musculus	solute carrier family 25 (mitochondrial carrier, phosphate carrier), member 24(Slc25a24)
ENSMUSG00000026177	SLC11A1	Mus musculus	solute carrier family 11 (proton-coupled divalent metal ion transporters), member 1(Slc11a1)
ENSMUSG00000027639	SAMHD1	Mus musculus	SAM domain and HD domain, 1(Samhd1)
ENSMUSG00000029560	SNX8	Mus musculus	sorting nexin 8(Snx8)
ENSMUSG00000054459	VSNL1	Mus musculus	visinin-like 1(Vsnl1)
ENSMUSG00000079592	C1QTNF5	Mus musculus	C1q and tumor necrosis factor related protein 5(C1qtnf5)
ENSMUSG00000024909	EFEMP2	Mus musculus	epidermal growth factor-containing fibulin-like extracellular matrix protein 2(Efemp2)
ENSMUSG00000059456	PTK2B	Mus musculus	PTK2 protein tyrosine kinase 2 beta(Ptk2b)
ENSMUSG00000068015	LRCH1	Mus musculus	leucine-rich repeats and calponin homology (CH) domain containing 1(Lrch1)
ENSMUSG00000027624	EPB41L1	Mus musculus	erythrocyte membrane protein band 4.1 like 1(Epb41l1)
ENSMUSG00000019883	ECHDC1	Mus musculus	enoyl Coenzyme A hydratase domain containing 1(Echdc1)
ENSMUSG00000048644	CTXN1	Mus musculus	cortexin 1(Ctxn1)
ENSMUSG00000059852	KCNG2	Mus musculus	potassium voltage-gated channel, subfamily G, member 2(Kcng2)
ENSMUSG00000002500	RPL3L	Mus musculus	ribosomal protein L3-like(Rpl3l)
ENSMUSG00000030657	XYLT1	Mus musculus	xylosyltransferase 1(Xylt1)
ENSMUSG00000007837	prrg2	Mus musculus	proline-rich Gla (G-carboxyglutamic acid) polypeptide 2(Prrg2)
ENSMUSG00000053470	KDM3A	Mus musculus	lysine (K)-specific demethylase 3A(Kdm3a)
ENSMUSG00000020232	HMG20B	Mus musculus	high mobility group 20B(Hmg20b)
ENSMUSG00000039693	MSANTD3	Mus musculus	Myb/SANT-like DNA-binding domain containing 3(Msantd3)
ENSMUSG00000062797	HIKESHI	Mus musculus	heat shock protein nuclear import factor(Hikeshi)
ENSMUSG00000037296	LSM1	Mus musculus	LSM1 homolog, mRNA degradation associated(Lsm1)
ENSMUSG00000039703	NPLOC4	Mus musculus	NPL4 homolog, ubiquitin recognition factor(Nploc4)
ENSMUSG00000019873	REEP3	Mus musculus	receptor accessory protein 3(Reep3)
ENSMUSG00000007805	TWIST2	Mus musculus	twist basic helix-loop-helix transcription factor 2(Twist2)
ENSMUSG00000038658	RIC1	Mus musculus	RAB6A GEF complex partner 1(Ric1)
ENSMUSG00000030685	kctd13	Mus musculus	potassium channel tetramerisation domain containing 13(Kctd13)
ENSMUSG00000025145	LRRC45	Mus musculus	leucine rich repeat containing 45(Lrrc45)
ENSMUSG00000020937	PLCD3	Mus musculus	phospholipase C, delta 3(Plcd3)
ENSMUSG00000019470	XAB2	Mus musculus	XPA binding protein 2(Xab2)
ENSMUSG00000029544	CABP1	Mus musculus	calcium binding protein 1(Cabp1)
ENSMUSG00000025557	SLC15A1	Mus musculus	solute carrier family 15 (oligopeptide transporter), member 1(Slc15a1)
ENSMUSG00000032402	SMAD3	Mus musculus	SMAD family member 3(Smad3)
ENSMUSG00000026159	AGFG1	Mus musculus	ArfGAP with FG repeats 1(Agfg1)
ENSMUSG00000041420	MEIS3	Mus musculus	Meis homeobox 3(Meis3)
ENSMUSG00000000416	CTTNBP2	Mus musculus	cortactin binding protein 2(Cttnbp2)
ENSMUSG00000030681	MVP	Mus musculus	major vault protein(Mvp)
ENSMUSG00000026155	SMAP1	Mus musculus	small ArfGAP 1(Smap1)
ENSMUSG00000026154	SDHAF4	Mus musculus	succinate dehydrogenase complex assembly factor 4(Sdhaf4)
ENSMUSG00000093904	TOMM20	Mus musculus	translocase of outer mitochondrial membrane 20 homolog (yeast)(Tomm20)
ENSMUSG00000030678	MAZ	Mus musculus	MYC-associated zinc finger protein (purine-binding transcription factor)(Maz)
ENSMUSG00000025155	DUS1L	Mus musculus	dihydrouridine synthase 1-like (S. cerevisiae)(Dus1l)
ENSMUSG00000038664	HERC1	Mus musculus	HECT and RLD domain containing E3 ubiquitin protein ligase family member 1(Herc1)
ENSMUSG00000012443	KIF11	Mus musculus	kinesin family member 11(Kif11)
ENSMUSG00000040373	CACNG5	Mus musculus	calcium channel, voltage-dependent, gamma subunit 5(Cacng5)
ENSMUSG00000020949	FKBP3	Mus musculus	FK506 binding protein 3(Fkbp3)
ENSMUSG00000025154	ARHGAP19	Mus musculus	Rho GTPase activating protein 19(Arhgap19)
ENSMUSG00000052395	RFT1	Mus musculus	RFT1 homolog(Rft1)
ENSMUSG00000019866	AIM1	Mus musculus	absent in melanoma 1(Aim1)
ENSMUSG00000019478	RAB4A	Mus musculus	RAB4A, member RAS oncogene family(Rab4a)
ENSMUSG00000029556	HNF1A	Mus musculus	HNF1 homeobox A(Hnf1a)
ENSMUSG00000029550	SPPL3	Mus musculus	signal peptide peptidase 3(Sppl3)
ENSMUSG00000020212	MDM1	Mus musculus	transformed mouse 3T3 cell double minute 1(Mdm1)
ENSMUSG00000072825	CEP170B	Mus musculus	centrosomal protein 170B(Cep170b)
ENSMUSG00000019851	PERP	Mus musculus	PERP, TP53 apoptosis effector(Perp)
ENSMUSG00000027677	TTC14	Mus musculus	tetratricopeptide repeat domain 14(Ttc14)
ENSMUSG00000019852	ARFGEF3	Mus musculus	ARFGEF family member 3(Arfgef3)
ENSMUSG00000020918	KAT2A	Mus musculus	K(lysine) acetyltransferase 2A(Kat2a)
ENSMUSG00000019854	REPS1	Mus musculus	RalBP1 associated Eps domain containing protein(Reps1)
ENSMUSG00000052384	NRROS	Mus musculus	negative regulator of reactive oxygen species(Nrros)
ENSMUSG00000066037	HNRNPR	Mus musculus	heterogeneous nuclear ribonucleoprotein R(Hnrnpr)
ENSMUSG00000075467	DNLZ	Mus musculus	DNL-type zinc finger(Dnlz)
ENSMUSG00000020923	UBTF	Mus musculus	upstream binding transcription factor, RNA polymerase I(Ubtf)
ENSMUSG00000030697	PPP4C	Mus musculus	protein phosphatase 4, catalytic subunit(Ppp4c)
ENSMUSG00000027669	GNB4	Mus musculus	guanine nucleotide binding protein (G protein), beta 4(Gnb4)
ENSMUSG00000002546	GOLGA2	Mus musculus	golgi autoantigen, golgin subfamily a, 2(Golga2)
ENSMUSG00000025137	PCYT2	Mus musculus	phosphate cytidylyltransferase 2, ethanolamine(Pcyt2)
ENSMUSG00000033382	TRAPPC8	Mus musculus	trafficking protein particle complex 8(Trappc8)
ENSMUSG00000025521	TMEM192	Mus musculus	transmembrane protein 192(Tmem192)
ENSMUSG00000029534	ST7	Mus musculus	suppression of tumorigenicity 7(St7)
ENSMUSG00000026142	RHBDD1	Mus musculus	rhomboid domain containing 1(Rhbdd1)
ENSMUSG00000022332	KHDRBS3	Mus musculus	KH domain containing, RNA binding, signal transduction associated 3(Khdrbs3)
ENSMUSG00000026141	COL19A1	Mus musculus	collagen, type XIX, alpha 1(Col19a1)
ENSMUSG00000019429	FFAR3	Mus musculus	free fatty acid receptor 3(Ffar3)
ENSMUSG00000001988	NPAS1	Mus musculus	neuronal PAS domain protein 1(Npas1)
ENSMUSG00000006315	TMEM147	Mus musculus	transmembrane protein 147(Tmem147)
ENSMUSG00000075376	RC3H2	Mus musculus	ring finger and CCCH-type zinc finger domains 2(Rc3h2)
ENSMUSG00000055567	UNC80	Mus musculus	unc-80, NALCN activator(Unc80)
ENSMUSG00000075486	COMMD6	Mus musculus	COMM domain containing 6(Commd6)
ENSMUSG00000031711	Zfp330	Mus musculus	zinc finger protein 330(Zfp330)
ENSMUSG00000032839	TRPC1	Mus musculus	transient receptor potential cation channel, subfamily C, member 1(Trpc1)
ENSMUSG00000091625	LSM5	Mus musculus	LSM5 homolog, U6 small nuclear RNA and mRNA degradation associated(Lsm5)
ENSMUSG00000039233	TBCE	Mus musculus	tubulin-specific chaperone E(Tbce)
ENSMUSG00000028782	ADGRB2	Mus musculus	adhesion G protein-coupled receptor B2(Adgrb2)
ENSMUSG00000051515	FAM181B	Mus musculus	family with sequence similarity 181, member B(Fam181b)
ENSMUSG00000068085	Cyp2d11	Mus musculus	cytochrome P450, family 2, subfamily d, polypeptide 11(Cyp2d11)
ENSMUSG00000015357	CLPX	Mus musculus	caseinolytic mitochondrial matrix peptidase chaperone subunit(Clpx)
ENSMUSG00000039747	ORAI2	Mus musculus	ORAI calcium release-activated calcium modulator 2(Orai2)
ENSMUSG00000024960	plcb3	Mus musculus	phospholipase C, beta 3(Plcb3)
ENSMUSG00000001985	GRIK3	Mus musculus	glutamate receptor, ionotropic, kainate 3(Grik3)
ENSMUSG00000021318	GLI3	Mus musculus	GLI-Kruppel family member GLI3(Gli3)
ENSMUSG00000021319	SFRP4	Mus musculus	secreted frizzled-related protein 4(Sfrp4)
ENSMUSG00000028789	AZIN2	Mus musculus	antizyme inhibitor 2(Azin2)
ENSMUSG00000034891	SNCB	Mus musculus	synuclein, beta(Sncb)
ENSMUSG00000034893	COG3	Mus musculus	component of oligomeric golgi complex 3(Cog3)
ENSMUSG00000025076	CASP7	Mus musculus	caspase 7(Casp7)
ENSMUSG00000024456	DIAPH1	Mus musculus	diaphanous related formin 1(Diaph1)
ENSMUSG00000031701	DNAJA2	Mus musculus	DnaJ heat shock protein family (Hsp40) member A2(Dnaja2)
ENSMUSG00000062300	NECTIN2	Mus musculus	nectin cell adhesion molecule 2(Nectin2)
ENSMUSG00000091636	AKAIN1	Mus musculus	A kinase (PRKA) anchor inhibitor 1(Akain1)
ENSMUSG00000024064	GALNT14	Mus musculus	UDP-N-acetyl-alpha-D-galactosamine:polypeptide N-acetylgalactosaminyltransferase 14(Galnt14)
ENSMUSG00000028771	PTPN12	Mus musculus	protein tyrosine phosphatase, non-receptor type 12(Ptpn12)
ENSMUSG00000038623	TM6SF1	Mus musculus	transmembrane 6 superfamily member 1(Tm6sf1)
ENSMUSG00000002233	RHOC	Mus musculus	ras homolog family member C(Rhoc)
ENSMUSG00000028776	TINAGL1	Mus musculus	tubulointerstitial nephritis antigen-like 1(Tinagl1)
ENSMUSG00000024952	RPS6KA4	Mus musculus	ribosomal protein S6 kinase, polypeptide 4(Rps6ka4)
ENSMUSG00000078570	1110065P20Rik	Mus musculus	RIKEN cDNA 1110065P20 gene(1110065P20Rik)
ENSMUSG00000038622	MED30	Mus musculus	mediator complex subunit 30(Med30)
ENSMUSG00000039728	SLC6A5	Mus musculus	solute carrier family 6 (neurotransmitter transporter, glycine), member 5(Slc6a5)
ENSMUSG00000044350	lacc1	Mus musculus	laccase (multicopper oxidoreductase) domain containing 1(Lacc1)
ENSMUSG00000071324	ARMC2	Mus musculus	armadillo repeat containing 2(Armc2)
ENSMUSG00000036606	PLXNB2	Mus musculus	plexin B2(Plxnb2)
ENSMUSG00000002980	bcam	Mus musculus	basal cell adhesion molecule(Bcam)
ENSMUSG00000042121	SSH1	Mus musculus	slingshot homolog 1 (Drosophila)(Ssh1)
ENSMUSG00000002984	TOMM40	Mus musculus	translocase of outer mitochondrial membrane 40 homolog (yeast)(Tomm40)
ENSMUSG00000043241	UPF2	Mus musculus	UPF2 regulator of nonsense transcripts homolog (yeast)(Upf2)
ENSMUSG00000063320	1190007I07Rik	Mus musculus	RIKEN cDNA 1190007I07 gene(1190007I07Rik)
ENSMUSG00000058799	NAP1L1	Mus musculus	nucleosome assembly protein 1-like 1(Nap1l1)
ENSMUSG00000002222	RMND5A	Mus musculus	required for meiotic nuclear division 5 homolog A(Rmnd5a)
ENSMUSG00000024983	VTI1A	Mus musculus	vesicle transport through interaction with t-SNAREs 1A(Vti1a)
ENSMUSG00000032417	RWDD2A	Mus musculus	RWD domain containing 2A(Rwdd2a)
ENSMUSG00000024431	NR3C1	Mus musculus	nuclear receptor subfamily 3, group C, member 1(Nr3c1)
ENSMUSG00000042901	AIDA	Mus musculus	axin interactor, dorsalization associated(Aida)
ENSMUSG00000032827	PPP1R9A	Mus musculus	protein phosphatase 1, regulatory (inhibitor) subunit 9A(Ppp1r9a)
ENSMUSG00000024043	ARHGAP28	Mus musculus	Rho GTPase activating protein 28(Arhgap28)
ENSMUSG00000010290	AI597479	Mus musculus	expressed sequence AI597479(AI597479)
ENSMUSG00000071726	Gm5941	Mus musculus	predicted gene 5941(Gm5941)
ENSMUSG00000028759	HP1BP3	Mus musculus	heterochromatin protein 1, binding protein 3(Hp1bp3)
ENSMUSG00000043252	TMEM64	Mus musculus	transmembrane protein 64(Tmem64)
ENSMUSG00000039205	CIZ1	Mus musculus	CDKN1A interacting zinc finger protein 1(Ciz1)
ENSMUSG00000028753	VWA5B1	Mus musculus	von Willebrand factor A domain containing 5B1(Vwa5b1)
ENSMUSG00000070526	Peg12	Mus musculus	paternally expressed 12(Peg12)
ENSMUSG00000043257	PIGV	Mus musculus	phosphatidylinositol glycan anchor biosynthesis, class V(Pigv)
ENSMUSG00000035504	REEP6	Mus musculus	receptor accessory protein 6(Reep6)
ENSMUSG00000029090	adgra3	Mus musculus	adhesion G protein-coupled receptor A3(Adgra3)
ENSMUSG00000027203	DUT	Mus musculus	deoxyuridine triphosphatase(Dut)
ENSMUSG00000027204	FBN1	Mus musculus	fibrillin 1(Fbn1)
ENSMUSG00000029095	ABLIM2	Mus musculus	actin-binding LIM protein 2(Ablim2)
ENSMUSG00000070570	SLC17A7	Mus musculus	solute carrier family 17 (sodium-dependent inorganic phosphate cotransporter), member 7(Slc17a7)
ENSMUSG00000027207	GALK2	Mus musculus	galactokinase 2(Galk2)
ENSMUSG00000035509	FBXL21	Mus musculus	F-box and leucine-rich repeat protein 21(Fbxl21)
ENSMUSG00000053441	ADAMTS19	Mus musculus	a disintegrin-like and metallopeptidase (reprolysin type) with thrombospondin type 1 motif, 19(Adamts19)
ENSMUSG00000032870	SMAP2	Mus musculus	small ArfGAP 2(Smap2)
ENSMUSG00000032872	CYB5R4	Mus musculus	cytochrome b5 reductase 4(Cyb5r4)
ENSMUSG00000048271	RBM33	Mus musculus	RNA binding motif protein 33(Rbm33)
ENSMUSG00000005233	SPC25	Mus musculus	SPC25, NDC80 kinetochore complex component, homolog (S. cerevisiae)(Spc25)
ENSMUSG00000051557	PUSL1	Mus musculus	pseudouridylate synthase-like 1(Pusl1)
ENSMUSG00000027612	MMP24	Mus musculus	matrix metallopeptidase 24(Mmp24)
ENSMUSG00000028745	CAPZB	Mus musculus	capping protein (actin filament) muscle Z-line, beta(Capzb)
ENSMUSG00000032482	CSPG5	Mus musculus	chondroitin sulfate proteoglycan 5(Cspg5)
ENSMUSG00000032485	SCAP	Mus musculus	SREBF chaperone(Scap)
ENSMUSG00000024426	ATAT1	Mus musculus	alpha tubulin acetyltransferase 1(Atat1)
ENSMUSG00000029089	PACRGL	Mus musculus	PARK2 co-regulated-like(Pacrgl)
ENSMUSG00000036186	FAM69B	Mus musculus	family with sequence similarity 69, member B(Fam69b)
ENSMUSG00000024411	AQP4	Mus musculus	aquaporin 4(Aqp4)
ENSMUSG00000036990	OTUD4	Mus musculus	OTU domain containing 4(Otud4)
ENSMUSG00000008450	NUTF2	Mus musculus	nuclear transport factor 2(Nutf2)
ENSMUSG00000006360	CRIP1	Mus musculus	cysteine-rich protein 1 (intestinal)(Crip1)
ENSMUSG00000051951	XKR4	Mus musculus	X-linked Kx blood group related 4(Xkr4)
ENSMUSG00000024913	LRP5	Mus musculus	low density lipoprotein receptor-related protein 5(Lrp5)
ENSMUSG00000024026	GLO1	Mus musculus	glyoxalase 1(Glo1)
ENSMUSG00000034854	MFSD12	Mus musculus	major facilitator superfamily domain containing 12(Mfsd12)
ENSMUSG00000105340	MAPKAPK5	Mus musculus	MAP kinase-activated protein kinase 5(Mapkapk5)
ENSMUSG00000035900	GRAMD4	Mus musculus	GRAM domain containing 4(Gramd4)
ENSMUSG00000027601	MTFR1	Mus musculus	mitochondrial fission regulator 1(Mtfr1)
ENSMUSG00000055531	CPSF6	Mus musculus	cleavage and polyadenylation specific factor 6(Cpsf6)
ENSMUSG00000068036	AFDN	Mus musculus	afadin, adherens junction formation factor(Afdn)
ENSMUSG00000039262	PRRC2B	Mus musculus	proline-rich coiled-coil 2B(Prrc2b)
ENSMUSG00000039263	NPEPL1	Mus musculus	aminopeptidase-like 1(Npepl1)
ENSMUSG00000036198	ARHGAP36	Mus musculus	Rho GTPase activating protein 36(Arhgap36)
ENSMUSG00000041482	PIEZO2	Mus musculus	piezo-type mechanosensitive ion channel component 2(Piezo2)
ENSMUSG00000036980	TAF6	Mus musculus	TATA-box binding protein associated factor 6(Taf6)
ENSMUSG00000024943	SMC5	Mus musculus	structural maintenance of chromosomes 5(Smc5)
ENSMUSG00000024948	MAP4K2	Mus musculus	mitogen-activated protein kinase kinase kinase kinase 2(Map4k2)
ENSMUSG00000025085	ABLIM1	Mus musculus	actin-binding LIM protein 1(Ablim1)
ENSMUSG00000024947	MEN1	Mus musculus	multiple endocrine neoplasia 1(Men1)
ENSMUSG00000039257	VSTM2B	Mus musculus	V-set and transmembrane domain containing 2B(Vstm2b)
ENSMUSG00000032852	RSPO4	Mus musculus	R-spondin 4(Rspo4)
ENSMUSG00000024942	CAPN1	Mus musculus	calpain 1(Capn1)
ENSMUSG00000025090	CCDC172	Mus musculus	coiled-coil domain containing 172(Ccdc172)
ENSMUSG00000039768	DNAJC11	Mus musculus	DnaJ heat shock protein family (Hsp40) member C11(Dnajc11)
ENSMUSG00000002265	PEG3	Mus musculus	paternally expressed 3(Peg3)
ENSMUSG00000039252	LGI2	Mus musculus	leucine-rich repeat LGI family, member 2(Lgi2)
ENSMUSG00000041488	STX3	Mus musculus	syntaxin 3(Stx3)
ENSMUSG00000060961	SLC4A4	Mus musculus	solute carrier family 4 (anion exchanger), member 4(Slc4a4)
ENSMUSG00000043614	VPS37D	Mus musculus	vacuolar protein sorting 37D(Vps37d)
ENSMUSG00000039254	POMT1	Mus musculus	protein-O-mannosyltransferase 1(Pomt1)
ENSMUSG00000032458	COPB2	Mus musculus	coatomer protein complex, subunit beta 2 (beta prime)(Copb2)
ENSMUSG00000005621	Zfp592	Mus musculus	zinc finger protein 592(Zfp592)
ENSMUSG00000025094	SLC18A2	Mus musculus	solute carrier family 18 (vesicular monoamine), member 2(Slc18a2)
ENSMUSG00000031298	ADGRG2	Mus musculus	adhesion G protein-coupled receptor G2(Adgrg2)
ENSMUSG00000074749	KIZ	Mus musculus	kizuna centrosomal protein(Kiz)
ENSMUSG00000039774	GALNT12	Mus musculus	UDP-N-acetyl-alpha-D-galactosamine:polypeptide N-acetylgalactosaminyltransferase 12(Galnt12)
ENSMUSG00000021326	TRIM27	Mus musculus	tripartite motif-containing 27(Trim27)
ENSMUSG00000070568	Slc6a21	Mus musculus	solute carrier family 6 member 21(Slc6a21)
ENSMUSG00000055553	KXD1	Mus musculus	KxDL motif containing 1(Kxd1)
ENSMUSG00000059409	PPP2R5D	Mus musculus	protein phosphatase 2, regulatory subunit B', delta(Ppp2r5d)
ENSMUSG00000061665	CD2AP	Mus musculus	CD2-associated protein(Cd2ap)
ENSMUSG00000060121	GEMIN2	Mus musculus	gem (nuclear organelle) associated protein 2(Gemin2)
ENSMUSG00000026638	IRF6	Mus musculus	interferon regulatory factor 6(Irf6)
ENSMUSG00000030255	SSPN	Mus musculus	sarcospan(Sspn)
ENSMUSG00000029176	ANAPC4	Mus musculus	anaphase promoting complex subunit 4(Anapc4)
ENSMUSG00000094559	Cyp2d34	Mus musculus	cytochrome P450, family 2, subfamily d, polypeptide 34(Cyp2d34)
ENSMUSG00000031783	POLR2C	Mus musculus	polymerase (RNA) II (DNA directed) polypeptide C(Polr2c)
ENSMUSG00000054863	FAM19A5	Mus musculus	family with sequence similarity 19, member A5(Fam19a5)
ENSMUSG00000050855	Zfp940	Mus musculus	zinc finger protein 940(Zfp940)
ENSMUSG00000014980	tsen15	Mus musculus	tRNA splicing endonuclease subunit 15(Tsen15)
ENSMUSG00000042594	SH2B3	Mus musculus	SH2B adaptor protein 3(Sh2b3)
ENSMUSG00000031392	IRAK1	Mus musculus	interleukin-1 receptor-associated kinase 1(Irak1)
ENSMUSG00000021266	WARS	Mus musculus	tryptophanyl-tRNA synthetase(Wars)
ENSMUSG00000031399	FAM3A	Mus musculus	family with sequence similarity 3, member A(Fam3a)
ENSMUSG00000026634	ANGEL2	Mus musculus	angel homolog 2 (Drosophila)(Angel2)
ENSMUSG00000029182	1700001C02Rik	Mus musculus	RIKEN cDNA 1700001C02 gene(1700001C02Rik)
ENSMUSG00000021260	hhipl1	Mus musculus	hedgehog interacting protein-like 1(Hhipl1)
ENSMUSG00000031788	KIFC3	Mus musculus	kinesin family member C3(Kifc3)
ENSMUSG00000027257	PACSIN3	Mus musculus	protein kinase C and casein kinase substrate in neurons 3(Pacsin3)
ENSMUSG00000026632	TATDN3	Mus musculus	TatD DNase domain containing 3(Tatdn3)
ENSMUSG00000031791	TMEM38A	Mus musculus	transmembrane protein 38A(Tmem38a)
ENSMUSG00000062376	BORCS7	Mus musculus	BLOC-1 related complex subunit 7(Borcs7)
ENSMUSG00000043183	SIMC1	Mus musculus	SUMO-interacting motifs containing 1(Simc1)
ENSMUSG00000029165	AGBL5	Mus musculus	ATP/GTP binding protein-like 5(Agbl5)
ENSMUSG00000051223	BZW1	Mus musculus	basic leucine zipper and W2 domains 1(Bzw1)
ENSMUSG00000041040	FAM117B	Mus musculus	family with sequence similarity 117, member B(Fam117b)
ENSMUSG00000041879	IPO9	Mus musculus	importin 9(Ipo9)
ENSMUSG00000036136	FAM110C	Mus musculus	family with sequence similarity 110, member C(Fam110c)
ENSMUSG00000021279	CDC42BPB	Mus musculus	CDC42 binding protein kinase beta(Cdc42bpb)
ENSMUSG00000021276	cinp	Mus musculus	cyclin-dependent kinase 2 interacting protein(Cinp)
ENSMUSG00000021275	TECPR2	Mus musculus	tectonin beta-propeller repeat containing 2(Tecpr2)
ENSMUSG00000048232	FBXO10	Mus musculus	F-box protein 10(Fbxo10)
ENSMUSG00000021271	Zfp839	Mus musculus	zinc finger protein 839(Zfp839)
ENSMUSG00000027778	IFT80	Mus musculus	intraflagellar transport 80(Ift80)
ENSMUSG00000027777	SCHIP1	Mus musculus	schwannomin interacting protein 1(Schip1)
ENSMUSG00000030269	MTMR14	Mus musculus	myotubularin related protein 14(Mtmr14)
ENSMUSG00000048234	RNF149	Mus musculus	ring finger protein 149(Rnf149)
ENSMUSG00000026643	NMT2	Mus musculus	N-myristoyltransferase 2(Nmt2)
ENSMUSG00000017119	NBR1	Mus musculus	neighbor of Brca1 gene 1(Nbr1)
ENSMUSG00000056091	ST3GAL5	Mus musculus	ST3 beta-galactoside alpha-2,3-sialyltransferase 5(St3gal5)
ENSMUSG00000026641	USF1	Mus musculus	upstream transcription factor 1(Usf1)
ENSMUSG00000026616	CR2	Mus musculus	complement receptor 2(Cr2)
ENSMUSG00000060147	Serpinb6a	Mus musculus	serine (or cysteine) peptidase inhibitor, clade B, member 6a(Serpinb6a)
ENSMUSG00000026617	BPNT1	Mus musculus	bisphosphate 3'-nucleotidase 1(Bpnt1)
ENSMUSG00000029196	TADA2B	Mus musculus	transcriptional adaptor 2B(Tada2b)
ENSMUSG00000021684	PDE8B	Mus musculus	phosphodiesterase 8B(Pde8b)
ENSMUSG00000032375	APH1B	Mus musculus	aph1 homolog B, gamma secretase subunit(Aph1b)
ENSMUSG00000037685	ATP8A1	Mus musculus	ATPase, aminophospholipid transporter (APLT), class I, type 8A, member 1(Atp8a1)
ENSMUSG00000044408	SPTSSA	Mus musculus	serine palmitoyltransferase, small subunit A(Sptssa)
ENSMUSG00000042572	UBE2Q1	Mus musculus	ubiquitin-conjugating enzyme E2Q family member 1(Ube2q1)
ENSMUSG00000002297	DBF4	Mus musculus	DBF4 zinc finger(Dbf4)
ENSMUSG00000044405	ADIG	Mus musculus	adipogenin(Adig)
ENSMUSG00000049303	SYT12	Mus musculus	synaptotagmin XII(Syt12)
ENSMUSG00000042570	MIER2	Mus musculus	MIER family member 2(Mier2)
ENSMUSG00000031377	BMX	Mus musculus	BMX non-receptor tyrosine kinase(Bmx)
ENSMUSG00000031370	zrsr2	Mus musculus	zinc finger (CCCH type), RNA binding motif and serine/arginine rich 2(Zrsr2)
ENSMUSG00000027239	MDK	Mus musculus	midkine(Mdk)
ENSMUSG00000027746	UFM1	Mus musculus	ubiquitin-fold modifier 1(Ufm1)
ENSMUSG00000029186	PI4K2B	Mus musculus	phosphatidylinositol 4-kinase type 2 beta(Pi4k2b)
ENSMUSG00000026627	TMEM206	Mus musculus	transmembrane protein 206(Tmem206)
ENSMUSG00000057766	ANKRD29	Mus musculus	ankyrin repeat domain 29(Ankrd29)
ENSMUSG00000029188	SLC34A2	Mus musculus	solute carrier family 34 (sodium phosphate), member 2(Slc34a2)
ENSMUSG00000036565	TTYH3	Mus musculus	tweety family member 3(Ttyh3)
ENSMUSG00000029189	SEL1L3	Mus musculus	sel-1 suppressor of lin-12-like 3 (C. elegans)(Sel1l3)
ENSMUSG00000032387	RBPMS2	Mus musculus	RNA binding protein with multiple splicing 2(Rbpms2)
ENSMUSG00000058831	OPN1SW	Mus musculus	opsin 1 (cone pigments), short-wave-sensitive (color blindness, tritan)(Opn1sw)
ENSMUSG00000049313	SORL1	Mus musculus	sortilin-related receptor, LDLR class A repeats-containing(Sorl1)
ENSMUSG00000042589	CUX2	Mus musculus	cut-like homeobox 2(Cux2)
ENSMUSG00000031362	Xlr4c	Mus musculus	X-linked lymphocyte-regulated 4C(Xlr4c)
ENSMUSG00000031360	CTPS2	Mus musculus	cytidine 5'-triphosphate synthase 2(Ctps2)
ENSMUSG00000027223	MAPK8IP1	Mus musculus	mitogen-activated protein kinase 8 interacting protein 1(Mapk8ip1)
ENSMUSG00000036151	TM6SF2	Mus musculus	transmembrane 6 superfamily member 2(Tm6sf2)
ENSMUSG00000067649	MAGEB18	Mus musculus	melanoma antigen family B, 18(Mageb18)
ENSMUSG00000029192	TBC1D14	Mus musculus	TBC1 domain family, member 14(Tbc1d14)
ENSMUSG00000026623	LPGAT1	Mus musculus	lysophosphatidylglycerol acyltransferase 1(Lpgat1)
ENSMUSG00000024871	Doc2g	Mus musculus	double C2, gamma(Doc2g)
ENSMUSG00000043153	ISPD	Mus musculus	isoprenoid synthase domain containing(Ispd)
ENSMUSG00000064307	LRRC51	Mus musculus	leucine rich repeat containing 51(Lrrc51)
ENSMUSG00000044469	TNFAIP8L1	Mus musculus	tumor necrosis factor, alpha-induced protein 8-like 1(Tnfaip8l1)
ENSMUSG00000024870	RAB1B	Mus musculus	RAB1B, member RAS oncogene family(Rab1b)
ENSMUSG00000055491	pprc1	Mus musculus	peroxisome proliferative activated receptor, gamma, coactivator-related 1(Pprc1)
ENSMUSG00000024873	CNIH2	Mus musculus	cornichon family AMPA receptor auxiliary protein 2(Cnih2)
ENSMUSG00000051278	ZGRF1	Mus musculus	zinc finger, GRF-type containing 1(Zgrf1)
ENSMUSG00000045915	CCDC42	Mus musculus	coiled-coil domain containing 42(Ccdc42)
ENSMUSG00000055493	EPM2A	Mus musculus	epilepsy, progressive myoclonic epilepsy, type 2 gene alpha(Epm2a)
ENSMUSG00000029131	DNAJB6	Mus musculus	DnaJ heat shock protein family (Hsp40) member B6(Dnajb6)
ENSMUSG00000022886	Prl2a1	Mus musculus	prolactin family 2, subfamily a, member 1(Prl2a1)
ENSMUSG00000004865	SRPK1	Mus musculus	serine/arginine-rich protein specific kinase 1(Srpk1)
ENSMUSG00000004864	mapk13	Mus musculus	mitogen-activated protein kinase 13(Mapk13)
ENSMUSG00000027298	TYRO3	Mus musculus	TYRO3 protein tyrosine kinase 3(Tyro3)
ENSMUSG00000056069	FAM105A	Mus musculus	family with sequence similarity 105, member A(Fam105a)
ENSMUSG00000036106	PRR5	Mus musculus	proline rich 5 (renal)(Prr5)
ENSMUSG00000024099	NDUFV2	Mus musculus	NADH dehydrogenase (ubiquinone) flavoprotein 2(Ndufv2)
ENSMUSG00000007411	MARK3	Mus musculus	MAP/microtubule affinity regulating kinase 3(Mark3)
ENSMUSG00000029126	NSG1	Mus musculus	neuron specific gene family member 1(Nsg1)
ENSMUSG00000029122	EVC	Mus musculus	Ellis van Creveld gene syndrome(Evc)
ENSMUSG00000029125	STX18	Mus musculus	syntaxin 18(Stx18)
ENSMUSG00000050824	SSTR5	Mus musculus	somatostatin receptor 5(Sstr5)
ENSMUSG00000044860	Gm1123	Mus musculus	predicted gene 1123(Gm1123)
ENSMUSG00000026604	PTPN14	Mus musculus	protein tyrosine phosphatase, non-receptor type 14(Ptpn14)
ENSMUSG00000029121	CRMP1	Mus musculus	collapsin response mediator protein 1(Crmp1)
ENSMUSG00000074793	HSPA12B	Mus musculus	heat shock protein 12B(Hspa12b)
ENSMUSG00000021678	F2RL1	Mus musculus	coagulation factor II (thrombin) receptor-like 1(F2rl1)
ENSMUSG00000021676	IQGAP2	Mus musculus	IQ motif containing GTPase activating protein 2(Iqgap2)
ENSMUSG00000011884	GLTP	Mus musculus	glycolipid transfer protein(Gltp)
ENSMUSG00000027288	ZFP106	Mus musculus	zinc finger protein 106(Zfp106)
ENSMUSG00000057103	Nat8f1	Mus musculus	N-acetyltransferase 8 (GCN5-related) family member 1(Nat8f1)
ENSMUSG00000027286	LRRC57	Mus musculus	leucine rich repeat containing 57(Lrrc57)
ENSMUSG00000063529	STMND1	Mus musculus	stathmin domain containing 1(Stmnd1)
ENSMUSG00000028799	Zfp362	Mus musculus	zinc finger protein 362(Zfp362)
ENSMUSG00000044447	DOCK5	Mus musculus	dedicator of cytokinesis 5(Dock5)
ENSMUSG00000031337	MTM1	Mus musculus	X-linked myotubular myopathy gene 1(Mtm1)
ENSMUSG00000000826	DNAJC5	Mus musculus	DnaJ heat shock protein family (Hsp40) member C5(Dnajc5)
ENSMUSG00000035458	TNNI3	Mus musculus	troponin I, cardiac 3(Tnni3)
ENSMUSG00000004843	CHMP2B	Mus musculus	charged multivesicular body protein 2B(Chmp2b)
ENSMUSG00000027787	NMD3	Mus musculus	NMD3 ribosome export adaptor(Nmd3)
ENSMUSG00000041805	Pramel1	Mus musculus	preferentially expressed antigen in melanoma-like 1(Pramel1)
ENSMUSG00000025017	pik3ap1	Mus musculus	phosphoinositide-3-kinase adaptor protein 1(Pik3ap1)
ENSMUSG00000023911	FLYWCH2	Mus musculus	FLYWCH family member 2(Flywch2)
ENSMUSG00000022865	CXADR	Mus musculus	coxsackie virus and adenovirus receptor(Cxadr)
ENSMUSG00000014599	CSF1	Mus musculus	colony stimulating factor 1 (macrophage)(Csf1)
ENSMUSG00000021280	EXOC3L4	Mus musculus	exocyst complex component 3-like 4(Exoc3l4)
ENSMUSG00000021281	TNFAIP2	Mus musculus	tumor necrosis factor, alpha-induced protein 2(Tnfaip2)
ENSMUSG00000023007	PRPF40B	Mus musculus	pre-mRNA processing factor 40B(Prpf40b)
ENSMUSG00000020515	CNOT8	Mus musculus	CCR4-NOT transcription complex, subunit 8(Cnot8)
ENSMUSG00000057134	ADO	Mus musculus	2-aminoethanethiol (cysteamine) dioxygenase(Ado)
ENSMUSG00000027272	UBR1	Mus musculus	ubiquitin protein ligase E3 component n-recognin 1(Ubr1)
ENSMUSG00000014592	CAMTA1	Mus musculus	calmodulin binding transcription activator 1(Camta1)
ENSMUSG00000004070	HMOX2	Mus musculus	heme oxygenase 2(Hmox2)
ENSMUSG00000038094	ATP13A4	Mus musculus	ATPase type 13A4(Atp13a4)
ENSMUSG00000024079	eif2ak2	Mus musculus	eukaryotic translation initiation factor 2-alpha kinase 2(Eif2ak2)
ENSMUSG00000089917	UCKL1	Mus musculus	uridine-cytidine kinase 1-like 1(Uckl1)
ENSMUSG00000023015	RACGAP1	Mus musculus	Rac GTPase-activating protein 1(Racgap1)
ENSMUSG00000023017	asic1	Mus musculus	acid-sensing (proton-gated) ion channel 1(Asic1)
ENSMUSG00000078485	PLEKHN1	Mus musculus	pleckstrin homology domain containing, family N member 1(Plekhn1)
ENSMUSG00000004837	GRAP	Mus musculus	GRB2-related adaptor protein(Grap)
ENSMUSG00000029147	PPM1G	Mus musculus	protein phosphatase 1G (formerly 2C), magnesium-dependent, gamma isoform(Ppm1g)
ENSMUSG00000020520	GALNT10	Mus musculus	UDP-N-acetyl-alpha-D-galactosamine:polypeptide N-acetylgalactosaminyltransferase 10(Galnt10)
ENSMUSG00000041815	POLDIP3	Mus musculus	polymerase (DNA-directed), delta interacting protein 3(Poldip3)
ENSMUSG00000025008	TCTN3	Mus musculus	tectonic family member 3(Tctn3)
ENSMUSG00000022856	TMEM41A	Mus musculus	transmembrane protein 41a(Tmem41a)
ENSMUSG00000062352	ITGB1BP1	Mus musculus	integrin beta 1 binding protein 1(Itgb1bp1)
ENSMUSG00000041028	GHITM	Mus musculus	growth hormone inducible transmembrane protein(Ghitm)
ENSMUSG00000021294	KIF26A	Mus musculus	kinesin family member 26A(Kif26a)
ENSMUSG00000036111	LMO1	Mus musculus	LIM domain only 1(Lmo1)
ENSMUSG00000023909	PAQR4	Mus musculus	progestin and adipoQ receptor family member IV(Paqr4)
ENSMUSG00000025968	NDUFS1	Mus musculus	NADH dehydrogenase (ubiquinone) Fe-S protein 1(Ndufs1)
ENSMUSG00000068551	Zfp467	Mus musculus	zinc finger protein 467(Zfp467)
ENSMUSG00000022433	csnk1e	Mus musculus	casein kinase 1, epsilon(Csnk1e)
ENSMUSG00000026121	SEMA4C	Mus musculus	sema domain, immunoglobulin domain (Ig), transmembrane domain (TM) and short cytoplasmic domain, (semaphorin) 4C(Sema4c)
ENSMUSG00000057156	HOMEZ	Mus musculus	homeodomain leucine zipper-encoding gene(Homez)
ENSMUSG00000022842	ECE2	Mus musculus	endothelin converting enzyme 2(Ece2)
ENSMUSG00000028389	ZFP37	Mus musculus	zinc finger protein 37(Zfp37)
ENSMUSG00000020577	TSPAN13	Mus musculus	tetraspanin 13(Tspan13)
ENSMUSG00000022849	HSPBAP1	Mus musculus	Hspb associated protein 1(Hspbap1)
ENSMUSG00000029513	PRKAB1	Mus musculus	protein kinase, AMP-activated, beta 1 non-catalytic subunit(Prkab1)
ENSMUSG00000025193	CUTC	Mus musculus	cutC copper transporter(Cutc)
ENSMUSG00000020572	NAMPT	Mus musculus	nicotinamide phosphoribosyltransferase(Nampt)
ENSMUSG00000023025	LARP4	Mus musculus	La ribonucleoprotein domain family, member 4(Larp4)
ENSMUSG00000023026	DIP2B	Mus musculus	disco interacting protein 2 homolog B(Dip2b)
ENSMUSG00000019826	ZBTB24	Mus musculus	zinc finger and BTB domain containing 24(Zbtb24)
ENSMUSG00000025198	ERLIN1	Mus musculus	ER lipid raft associated 1(Erlin1)
ENSMUSG00000020570	Sypl	Mus musculus	synaptophysin-like protein(Sypl)
ENSMUSG00000025195	dnmbp	Mus musculus	dynamin binding protein(Dnmbp)
ENSMUSG00000023973	CNPY3	Mus musculus	canopy FGF signaling regulator 3(Cnpy3)
ENSMUSG00000025196	CPN1	Mus musculus	carboxypeptidase N, polypeptide 1(Cpn1)
ENSMUSG00000022436	sh3bp1	Mus musculus	SH3-domain binding protein 1(Sh3bp1)
ENSMUSG00000023020	COX14	Mus musculus	cytochrome c oxidase assembly protein 14(Cox14)
ENSMUSG00000073643	WDFY1	Mus musculus	WD repeat and FYVE domain containing 1(Wdfy1)
ENSMUSG00000079610	ankrd39	Mus musculus	ankyrin repeat domain 39(Ankrd39)
ENSMUSG00000025977	BOLL	Mus musculus	bol, boule-like (Drosophila)(Boll)
ENSMUSG00000042524	SUN2	Mus musculus	Sad1 and UNC84 domain containing 2(Sun2)
ENSMUSG00000026111	UNC50	Mus musculus	unc-50 homolog (C. elegans)(Unc50)
ENSMUSG00000059901	ADAMTS14	Mus musculus	a disintegrin-like and metallopeptidase (reprolysin type) with thrombospondin type 1 motif, 14(Adamts14)
ENSMUSG00000045348	NYAP1	Mus musculus	neuronal tyrosine-phosphorylated phosphoinositide 3-kinase adaptor 1(Nyap1)
ENSMUSG00000049764	Zfp280b	Mus musculus	zinc finger protein 280B(Zfp280b)
ENSMUSG00000045349	SH2D5	Mus musculus	SH2 domain containing 5(Sh2d5)
ENSMUSG00000029504	DDX51	Mus musculus	DEAD (Asp-Glu-Ala-Asp) box polypeptide 51(Ddx51)
ENSMUSG00000039621	PREX1	Mus musculus	phosphatidylinositol-3,4,5-trisphosphate-dependent Rac exchange factor 1(Prex1)
ENSMUSG00000023034	NR4A1	Mus musculus	nuclear receptor subfamily 4, group A, member 1(Nr4a1)
ENSMUSG00000038039	GCC2	Mus musculus	GRIP and coiled-coil domain containing 2(Gcc2)
ENSMUSG00000034377	TULP4	Mus musculus	tubby like protein 4(Tulp4)
ENSMUSG00000039629	STRIP2	Mus musculus	striatin interacting protein 2(Strip2)
ENSMUSG00000023032	SLC4A8	Mus musculus	solute carrier family 4 (anion exchanger), member 8(Slc4a8)
ENSMUSG00000014504	SRP19	Mus musculus	signal recognition particle 19(Srp19)
ENSMUSG00000023036	PCDHGC4	Mus musculus	protocadherin gamma subfamily C, 4(Pcdhgc4)
ENSMUSG00000023961	ENPP4	Mus musculus	ectonucleotide pyrophosphatase/phosphodiesterase 4(Enpp4)
ENSMUSG00000033419	SNAP91	Mus musculus	synaptosomal-associated protein 91(Snap91)
ENSMUSG00000029911	SSBP1	Mus musculus	single-stranded DNA binding protein 1(Ssbp1)
ENSMUSG00000022449	ADAMTS20	Mus musculus	a disintegrin-like and metallopeptidase (reprolysin type) with thrombospondin type 1 motif, 20(Adamts20)
ENSMUSG00000023030	SLC11A2	Mus musculus	solute carrier family 11 (proton-coupled divalent metal ion transporters), member 2(Slc11a2)
ENSMUSG00000056019	Zfp709	Mus musculus	zinc finger protein 709(Zfp709)
ENSMUSG00000004880	LBR	Mus musculus	lamin B receptor(Lbr)
ENSMUSG00000070287	SLC35G2	Mus musculus	solute carrier family 35, member G2(Slc35g2)
ENSMUSG00000000325	arvcf	Mus musculus	armadillo repeat gene deleted in velo-cardio-facial syndrome(Arvcf)
ENSMUSG00000084845	TMEM240	Mus musculus	transmembrane protein 240(Tmem240)
ENSMUSG00000001440	KPNB1	Mus musculus	karyopherin (importin) beta 1(Kpnb1)
ENSMUSG00000020190	MKNK2	Mus musculus	MAP kinase-interacting serine/threonine kinase 2(Mknk2)
ENSMUSG00000019806	AIG1	Mus musculus	androgen-induced 1(Aig1)
ENSMUSG00000035498	CDCP1	Mus musculus	CUB domain containing protein 1(Cdcp1)
ENSMUSG00000045333	Zfp423	Mus musculus	zinc finger protein 423(Zfp423)
ENSMUSG00000025171	UBTD1	Mus musculus	ubiquitin domain containing 1(Ubtd1)
ENSMUSG00000038069	CDKN2AIP	Mus musculus	CDKN2A interacting protein(Cdkn2aip)
ENSMUSG00000008958	vps72	Mus musculus	vacuolar protein sorting 72(Vps72)
ENSMUSG00000020553	PCTP	Mus musculus	phosphatidylcholine transfer protein(Pctp)
ENSMUSG00000000320	ALOX12	Mus musculus	arachidonate 12-lipoxygenase(Alox12)
ENSMUSG00000038068	RNF144B	Mus musculus	ring finger protein 144B(Rnf144b)
ENSMUSG00000029119	man2b2	Mus musculus	mannosidase 2, alpha B2(Man2b2)
ENSMUSG00000022416	CACNA1I	Mus musculus	calcium channel, voltage-dependent, alpha 1I subunit(Cacna1i)
ENSMUSG00000025178	PI4K2A	Mus musculus	phosphatidylinositol 4-kinase type 2 alpha(Pi4k2a)
ENSMUSG00000034361	CPNE2	Mus musculus	copine II(Cpne2)
ENSMUSG00000028358	Zfp618	Mus musculus	zinc finger protein 618(Zfp618)
ENSMUSG00000028356	AMBP	Mus musculus	alpha 1 microglobulin/bikunin(Ambp)
ENSMUSG00000023944	HSP90AB1	Mus musculus	heat shock protein 90 alpha (cytosolic), class B member 1(Hsp90ab1)
ENSMUSG00000023942	SLC29A1	Mus musculus	solute carrier family 29 (nucleoside transporters), member 1(Slc29a1)
ENSMUSG00000019814	LTV1	Mus musculus	LTV1 ribosome biogenesis factor(Ltv1)
ENSMUSG00000025162	CSNK1D	Mus musculus	casein kinase 1, delta(Csnk1d)
ENSMUSG00000079635	Rhox4c	Mus musculus	reproductive homeobox 4C(Rhox4c)
ENSMUSG00000023050	MAP3K12	Mus musculus	mitogen-activated protein kinase kinase kinase 12(Map3k12)
ENSMUSG00000081534	SLC48A1	Mus musculus	solute carrier family 48 (heme transporter), member 1(Slc48a1)
ENSMUSG00000000884	GNB1L	Mus musculus	guanine nucleotide binding protein (G protein), beta polypeptide 1-like(Gnb1l)
ENSMUSG00000018677	SLC25A39	Mus musculus	solute carrier family 25, member 39(Slc25a39)
ENSMUSG00000000881	DLG3	Mus musculus	discs, large homolog 3 (Drosophila)(Dlg3)
ENSMUSG00000026670	UAP1	Mus musculus	UDP-N-acetylglucosamine pyrophosphorylase 1(Uap1)
ENSMUSG00000037236	MATR3	Mus musculus	matrin 3(Matr3)
ENSMUSG00000037235	MXD4	Mus musculus	Max dimerization protein 4(Mxd4)
ENSMUSG00000028343	ERP44	Mus musculus	endoplasmic reticulum protein 44(Erp44)
ENSMUSG00000039671	ZMYND8	Mus musculus	zinc finger, MYND-type containing 8(Zmynd8)
ENSMUSG00000038000	ACD	Mus musculus	adrenocortical dysplasia(Acd)
ENSMUSG00000036570	FXYD1	Mus musculus	FXYD domain-containing ion transport regulator 1(Fxyd1)
ENSMUSG00000038005	Hpf1	Mus musculus	histone PARylation factor 1(Hpf1)
ENSMUSG00000034341	WBP2	Mus musculus	WW domain binding protein 2(Wbp2)
ENSMUSG00000034343	UBE2F	Mus musculus	ubiquitin-conjugating enzyme E2F (putative)(Ube2f)
ENSMUSG00000030226	LMO3	Mus musculus	LIM domain only 3(Lmo3)
[truncated: 41 more rows]
