# Supplementary material for: Heavy Chronic Intermittent Ethanol Exposure Alters Small Noncoding RNAs in Mouse Sperm and Epididymosomes
Source: Front Genet. 2018 Feb 8;9:32. doi: 10.3389/fgene.2018.00032 (PMC5809758; doi:10.3389/fgene.2018.00032)
Supplement: Supplementary Table 6 — List of RNA modifications examined with UHPLC-MS/MS. [file Table6.XLSX]

## Sheet: Sheet1
Symbol	Type of RNA modification	Parent nuceloside
ac4C	N4-acetylcytidine	cytidine
Cm	2-O'-methylcytidine
f5C	5-formylcytidine
m5C	5-methylcytidine
m3C	3-methylcytidine
Am	2-O'-methyladenosine	adenosine
m1A	1-methyladenosine
m6A	N6-methyladenosine
Um	2-O'-methyluridine	uridine
m3U	3-methyluridine
m5U	5-methyluridine
s2U	2-thiouridine
mnm5U	5-methylaminomethyluridine
mcm5U	5-methoxycarbonylmethyluridine
mnm5s2U	5-methylaminomethyl-2-thiouridine
cmnm5U	5-carboxymethylaminomethyluridine
	pseudouridine	guanosine
Gm	2-O'-methylguanosine
m22G	N2-dimethylguanosine
m2G	N2-methylguanosine
m7G	7-methylguanosine
